# Supplementary material for: Synthesis and Conformational Analysis of Hydantoin-Based Universal Peptidomimetics
Source: PubMed Central journal article supplement (PMC10407853; doi:10.1021/acs.joc.2c01903), 2022-10-13
Supplement: jo2c01903_si_001.pdf [file jo2c01903_si_001.pdf]

# SUPPORTING INFORMATION

## Synthesis and Conformational Analysis of Hydantoin-Based Universal Peptidomimetics

Alessio M. Caramiello,<sup>†</sup> Maria Cristina Bellucci,<sup>§</sup> Gaetano Cristina,<sup>†</sup> Carlo Castellano,<sup>¶</sup> Fiorella Meneghetti,<sup>¥</sup> Matteo Mori,<sup>¥</sup> Francesco Secundo,<sup>‡</sup> Fiorenza Viani,<sup>‡</sup> Alessandro Sacchetti,<sup>†,\*</sup>  
Alessandro Volonterio<sup>†,‡,\*</sup>

<sup>†</sup> Department of Chemistry, Material and Chemical Engineering “Giulio Natta”, Politecnico di Milano, via mancinelli 7, 20311 Milano, ITALY.

<sup>§</sup> Department of Food, Environmental and Nutritional Sciences, Università degli Studi di Milano, via Celoria 2, 20133 Milano, Italy .

<sup>¥</sup> Department of Pharmaceutical Sciences, Università degli Studi di Milano, via Mangiagalli 25, 20133 Milano, Italy.

<sup>¶</sup> Department of Chemistry, Università degli Studi di Milano, via Golgi 19, 20133 Milano.

<sup>‡</sup> Consiglio Nazionale delle Ricerche, Istituto di Scienze e Tecnologie Chimiche “G. Natta” (SCITEC), via Mario Bianco 9, 20131 Milan, Italy

[alessandro.volonterio@polimi.it](mailto:alessandro.volonterio@polimi.it); [alessandro.sacchetti@polimi.it](mailto:alessandro.sacchetti@polimi.it)

### **Table of contents**

|                 |                                                                                               |
|-----------------|-----------------------------------------------------------------------------------------------|
| Pages S2-S117   | Copies of the <sup>1</sup> H NMR, <sup>13</sup> C NMR and ESI MS spectra of all new compounds |
| Page S118       | Figure S1. Results from Monte Carlo/MM conformational analysis.                               |
| Pages S119-S123 | Figures S2-S6. Copies of the VT <sup>1</sup> H NMR experiments                                |
| Pages S124-S125 | Figures S7-S8. Copies of the <sup>1</sup> H NMR DMSO titrations experiments                   |
| Page S126       | Table S1. Selected H-bond distances and angles.                                               |

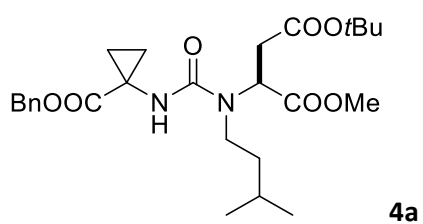

<sup>1</sup>H-NMR (400 MHz, CDCl<sub>3</sub>)

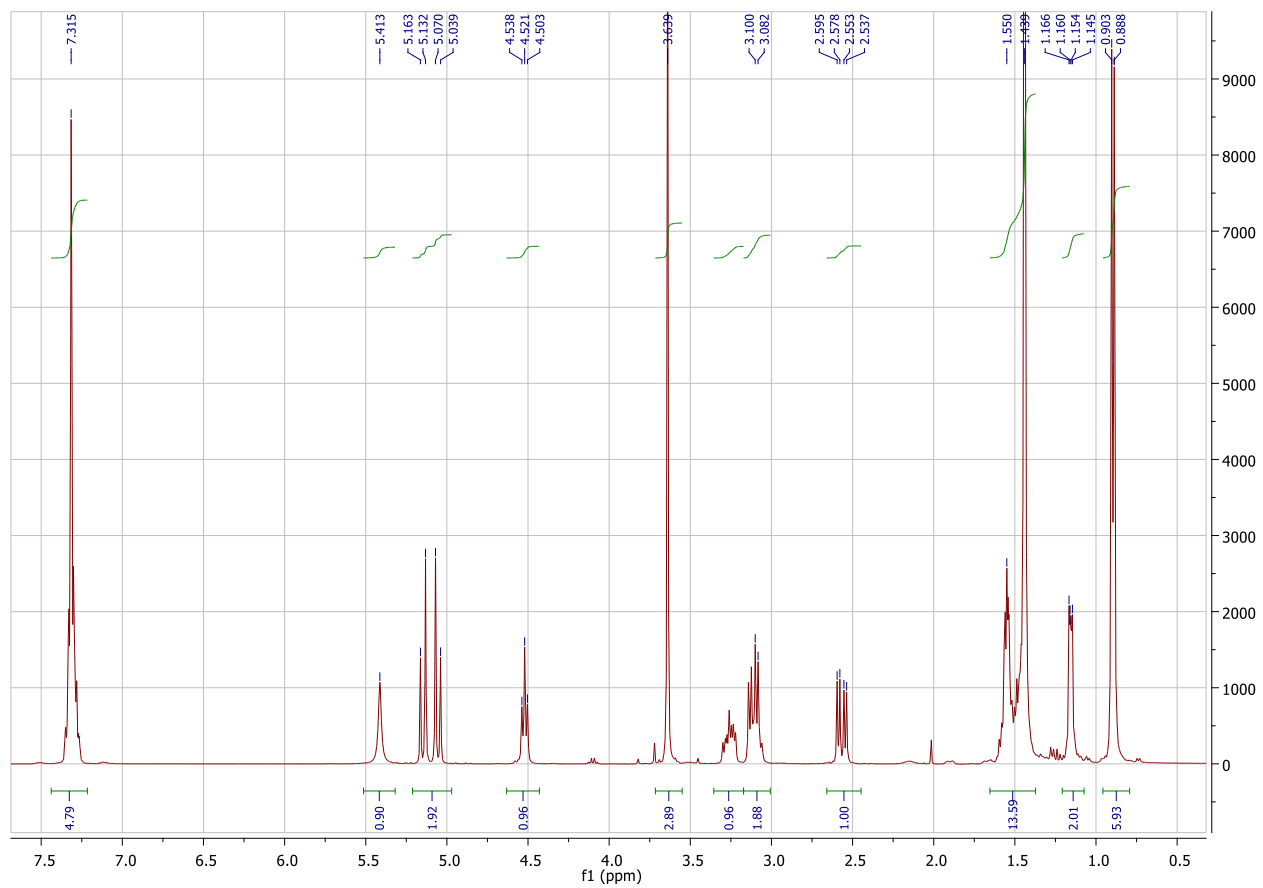

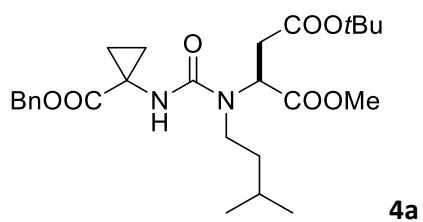

$^{13}\text{C}\{^1\text{H}\}$ -NMR (101 MHz,  $\text{CDCl}_3$ )

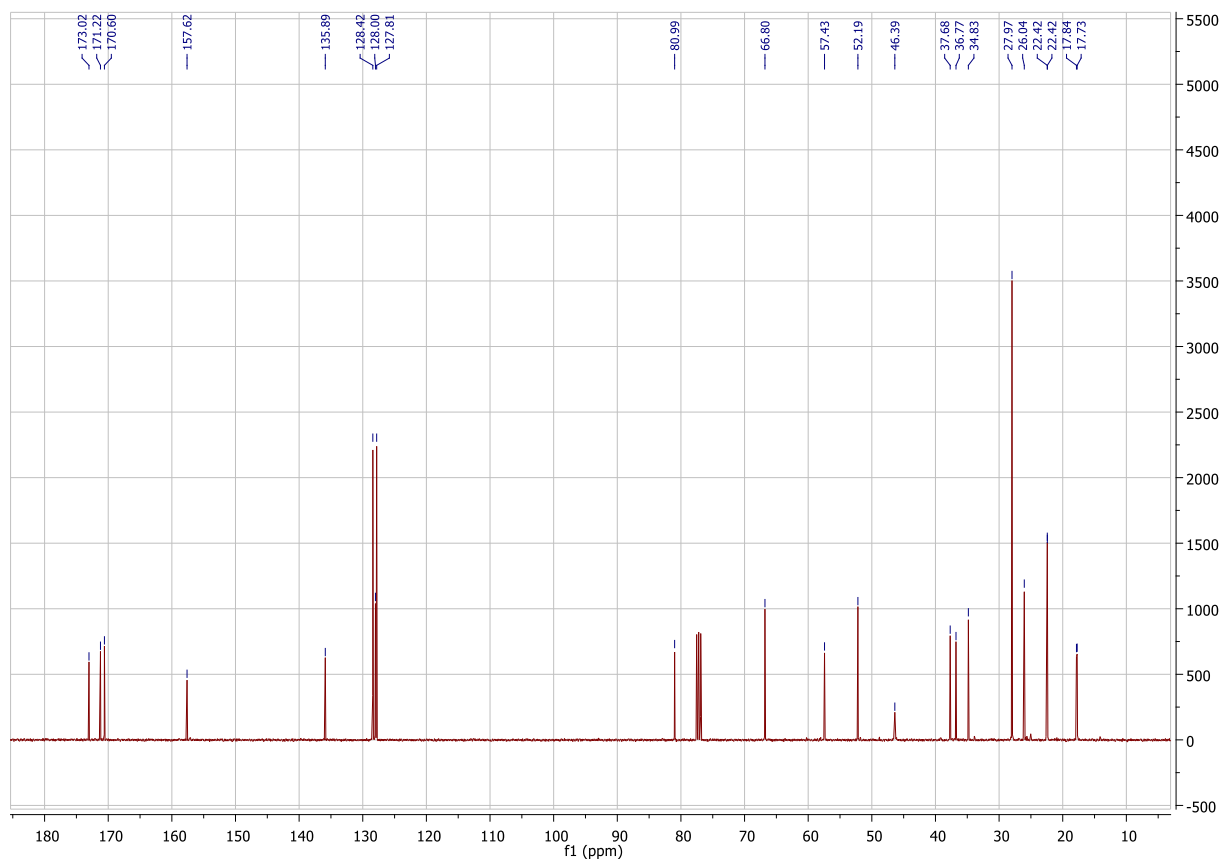

**-L.G.S. - Laboratorio Grandi Strumenti - Display Report**

|               |                                                  |                  |                        |            |                 |
|---------------|--------------------------------------------------|------------------|------------------------|------------|-----------------|
| Analysis Name | av_gc22b.d                                       | Acquisition Date | 02/08/18 14:19:50      | Operator   | Walter Panzeri  |
| Sample Name   |                                                  | Method           | Copy of _01tmix_posneg | Instrument | esquire3000plus |
| Comment       | 1 mg/ml dil 1:100 CH3CN<br>Richiedente: Cristina |                  | Im.MS                  |            |                 |

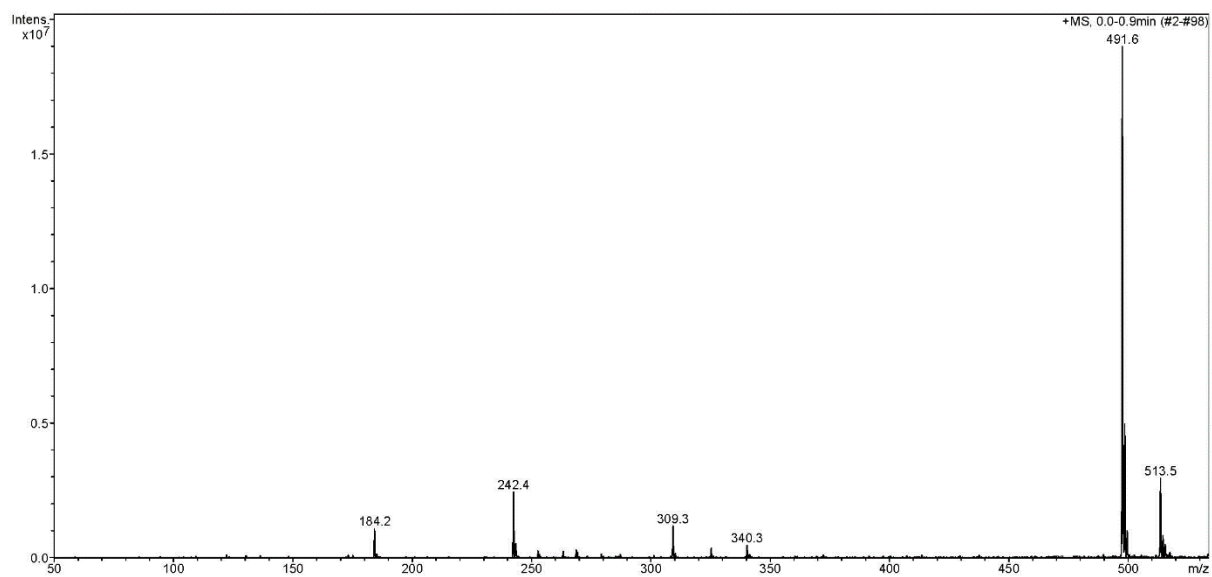

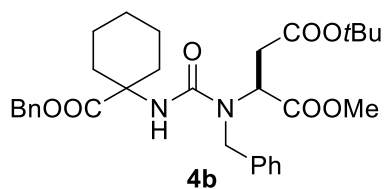

$^1\text{H-NMR}$  (400 MHz,  $\text{CDCl}_3$ )

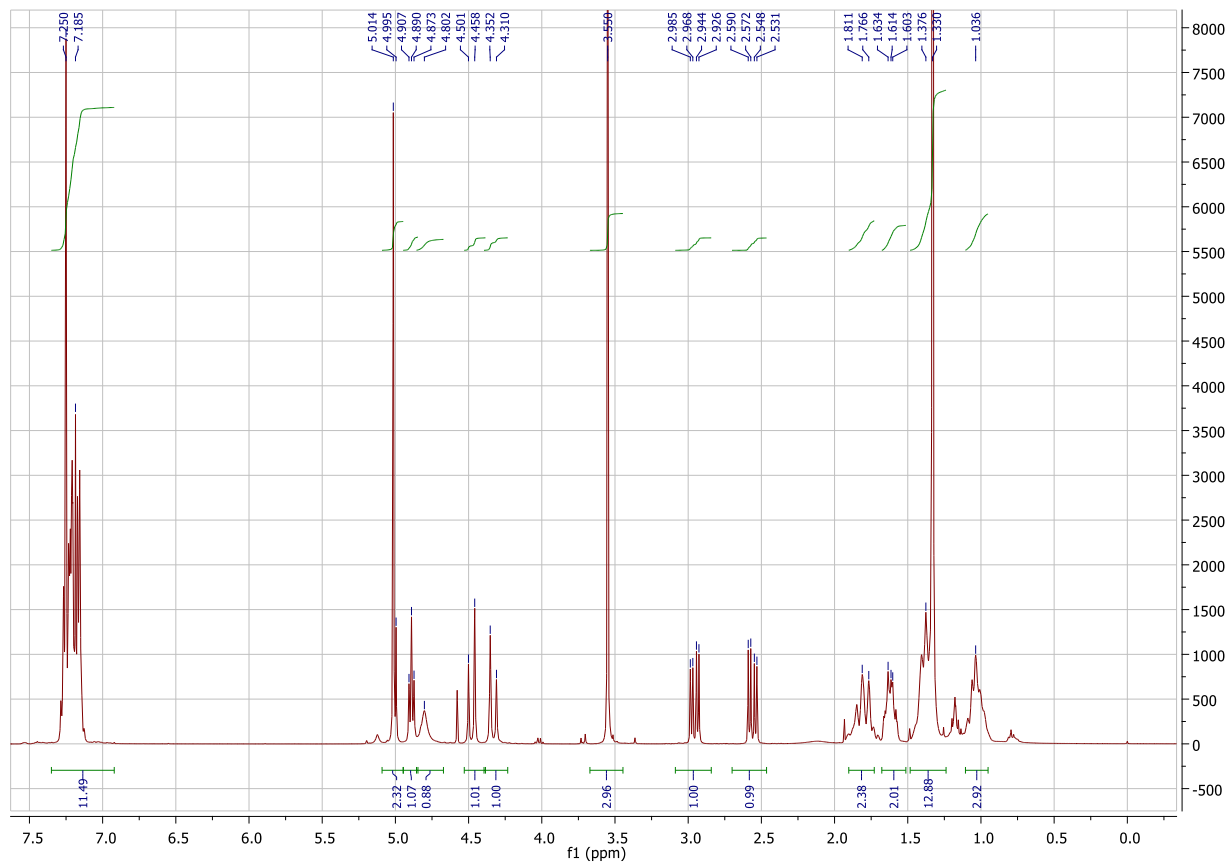



$^{13}\text{C}\{^1\text{H}\}$ -NMR (101 MHz,  $\text{CDCl}_3$ )

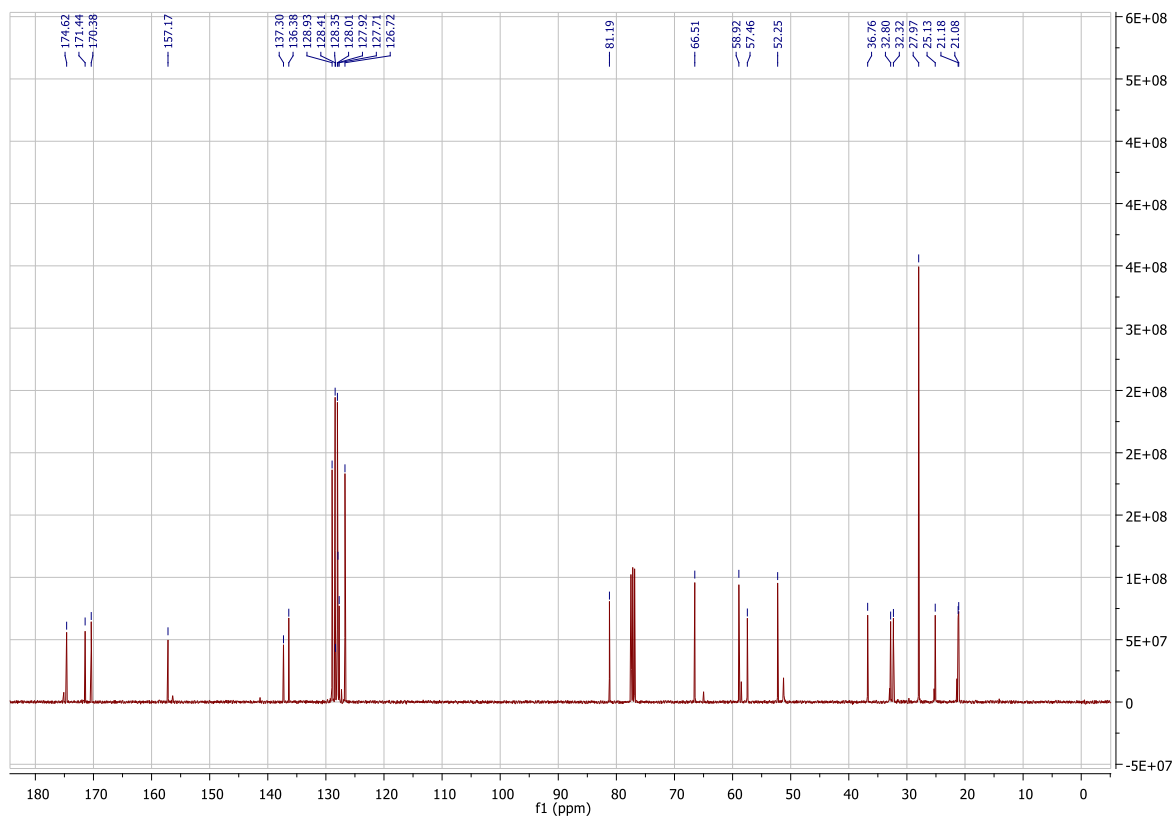

-L.G.S. - Laboratorio Grandi Strumenti - Display Report

Analysis Name av gc83.d  
Sample Name  
Comment 1 mg/ml dil 1:100 MeOH  
Richiedente: Cristina

Acquisition Date 09/24/18 15:47:02  
Method Copy of \_01tmix\_posneg  
Im.MS

Operator Walter Panzeri  
Instrument esquire3000plus

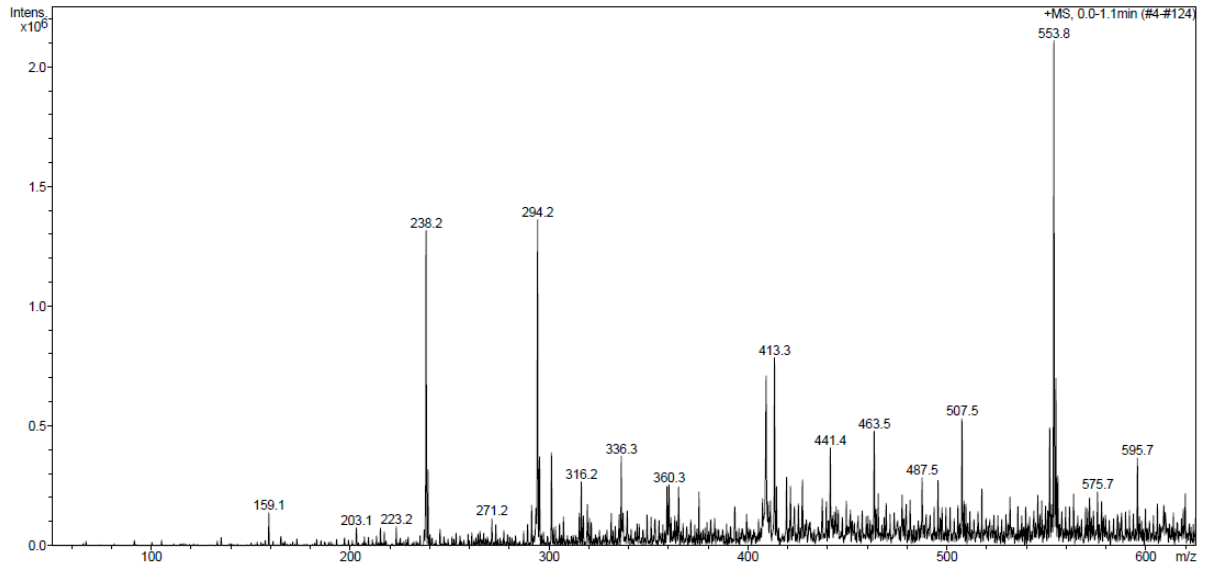

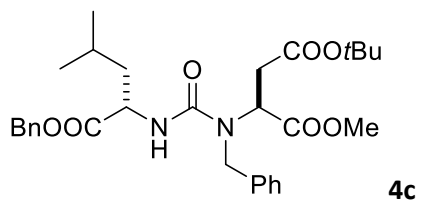

$^1\text{H-NMR}$  (400 MHz,  $\text{CDCl}_3$ )

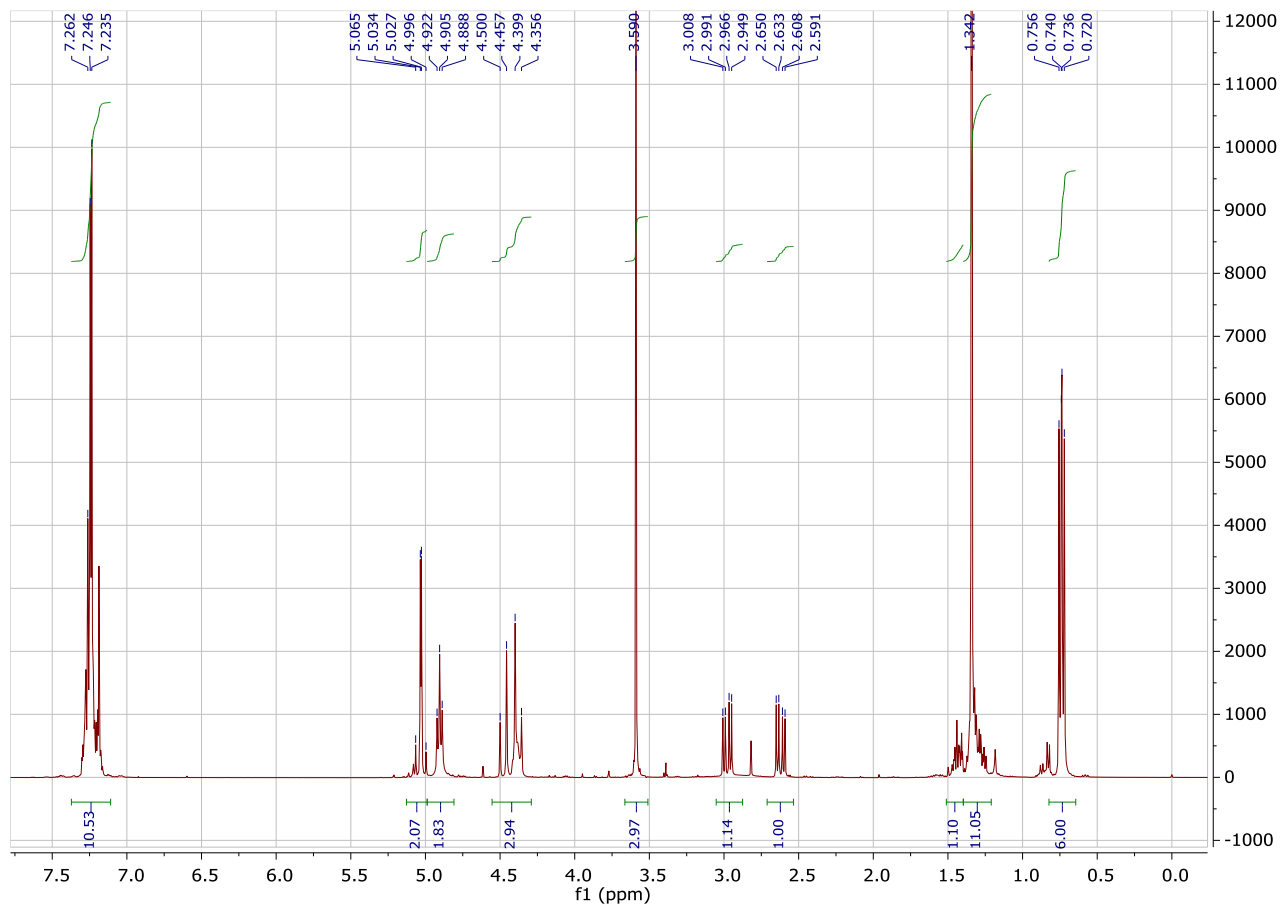



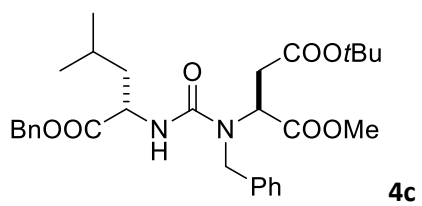

$^{13}\text{C}\{^1\text{H}\}$ -NMR (101 MHz,  $\text{CDCl}_3$ )

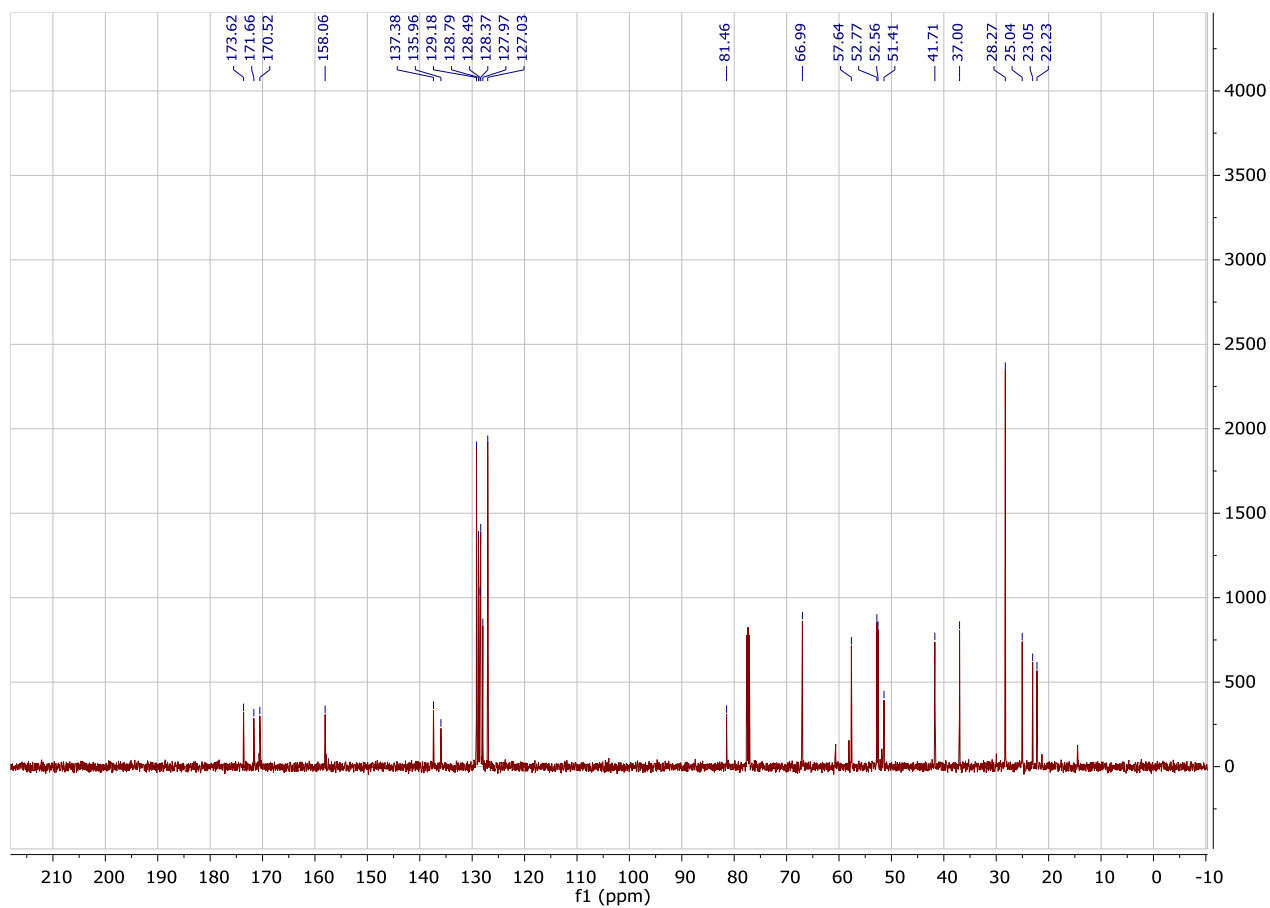

-L.G.S. - Laboratorio Grandi Strumenti - Display Report

|               |                                                |                  |                        |            |                 |
|---------------|------------------------------------------------|------------------|------------------------|------------|-----------------|
| Analysis Name | av gc85a.d                                     | Acquisition Date | 10/02/18 13:53:06      | Operator   | Walter Panzeri  |
| Sample Name   |                                                | Method           | Copy of _01tmix_posneg | Instrument | esquire3000plus |
| Comment       | 1 mg/ml dil 1:100 MeOH<br>Richiedente Cristina |                  | Im.MS                  |            |                 |

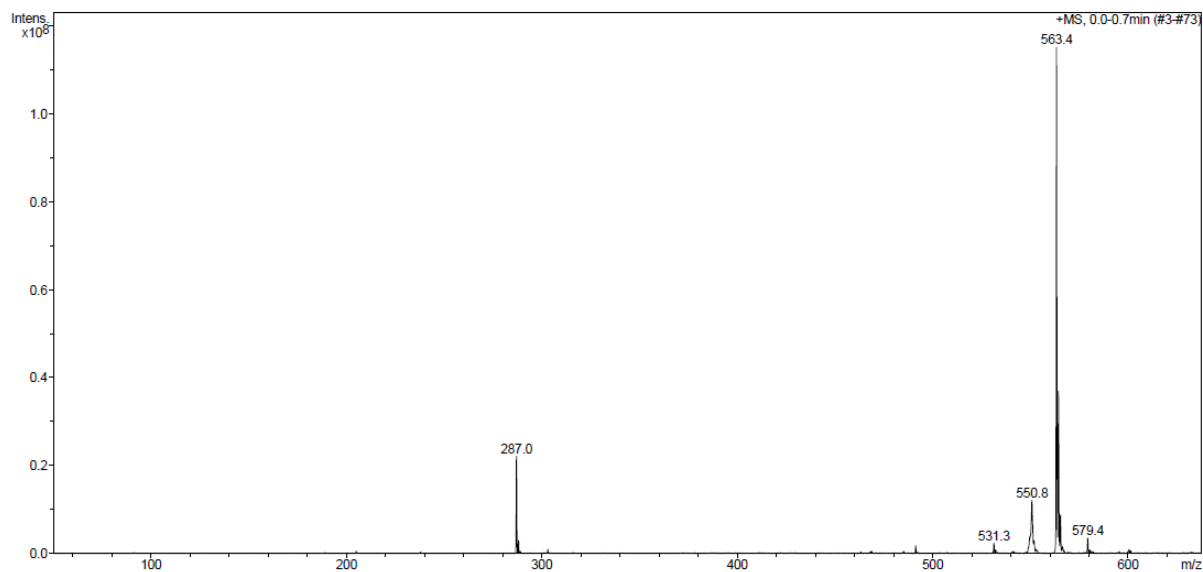

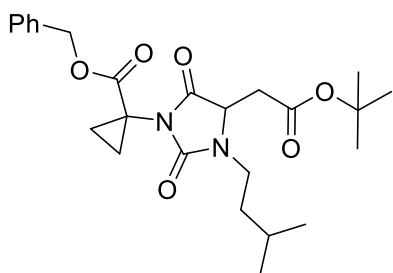

5a

$^1\text{H-NMR}$  (400 MHz,  $\text{CDCl}_3$ )

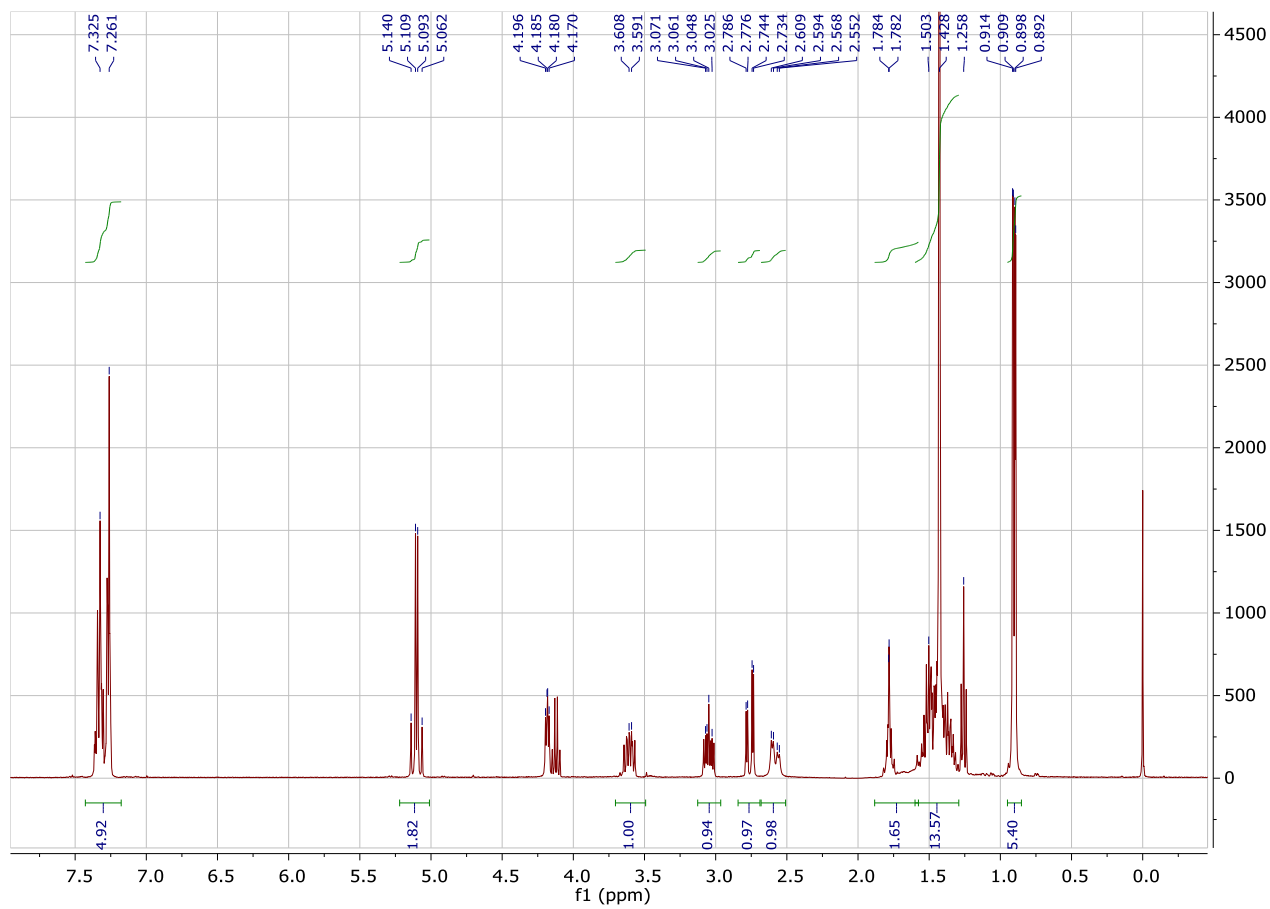

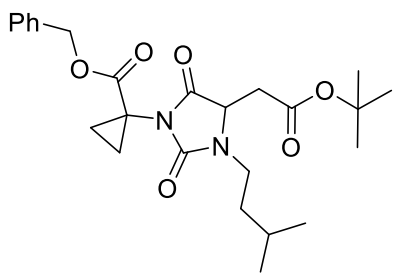

$^{13}\text{C}\{^1\text{H}\}$ -NMR (101 MHz,  $\text{CDCl}_3$ )

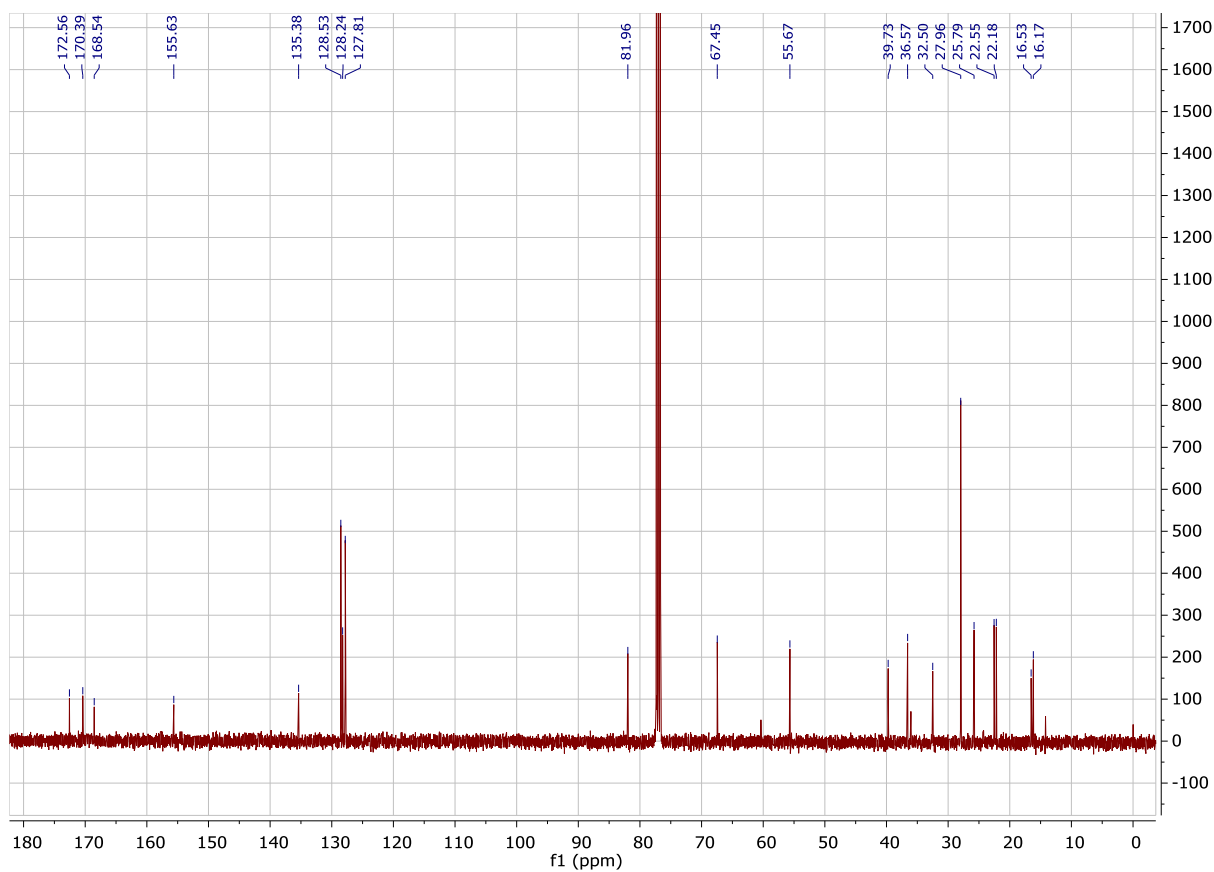

-L.G.S. - Laboratorio Grandi Strumenti - Display Report

Analysis Name av gc118.d  
Sample Name  
Comment 1 mg/ml dil 1:100 MeOH  
Richiedente: Cristina

Acquisition Date 03/26/19 13:57:44  
Method Copy of \_01tmix\_posneg  
lm.MS

Operator Walter Panzeri  
Instrument esquire3000plus

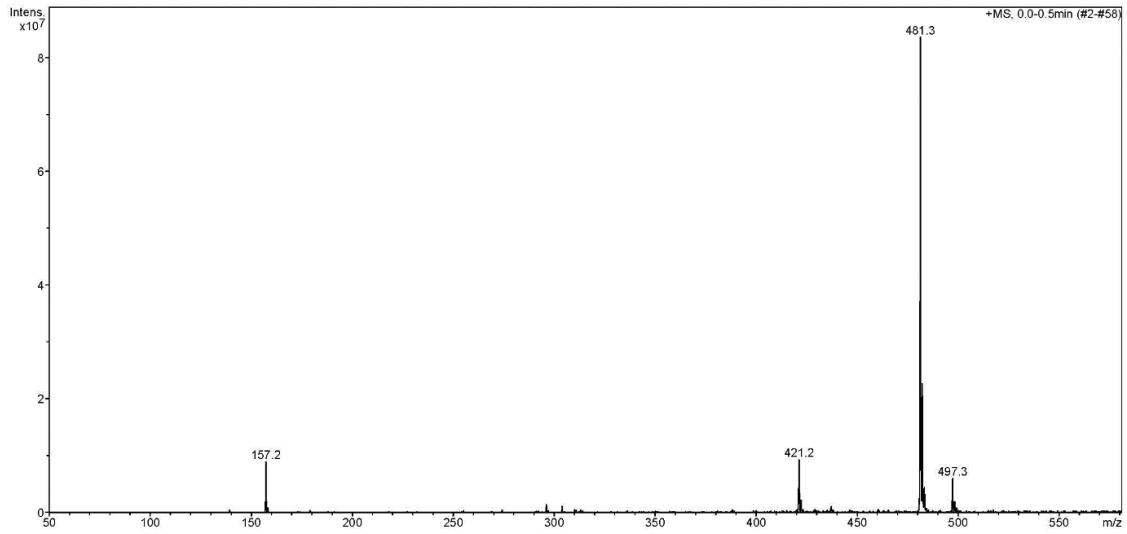

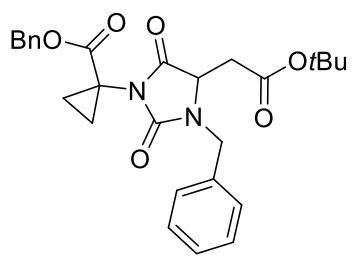

**5b**

$^1\text{H-NMR}$  (400 MHz,  $\text{CDCl}_3$ )

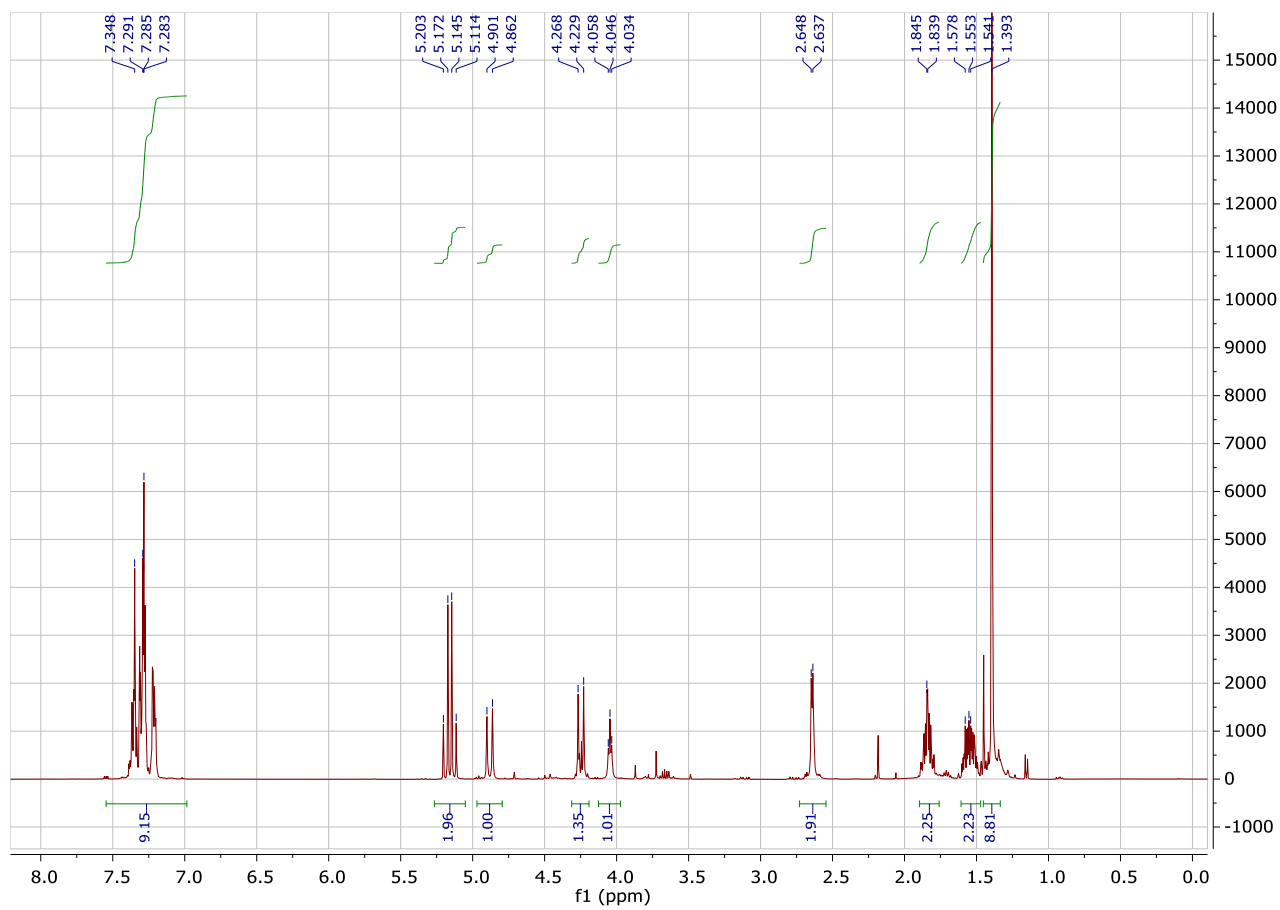



**5b**

$^{13}\text{C}\{^1\text{H}\}$ -NMR (101 MHz,  $\text{CDCl}_3$ )

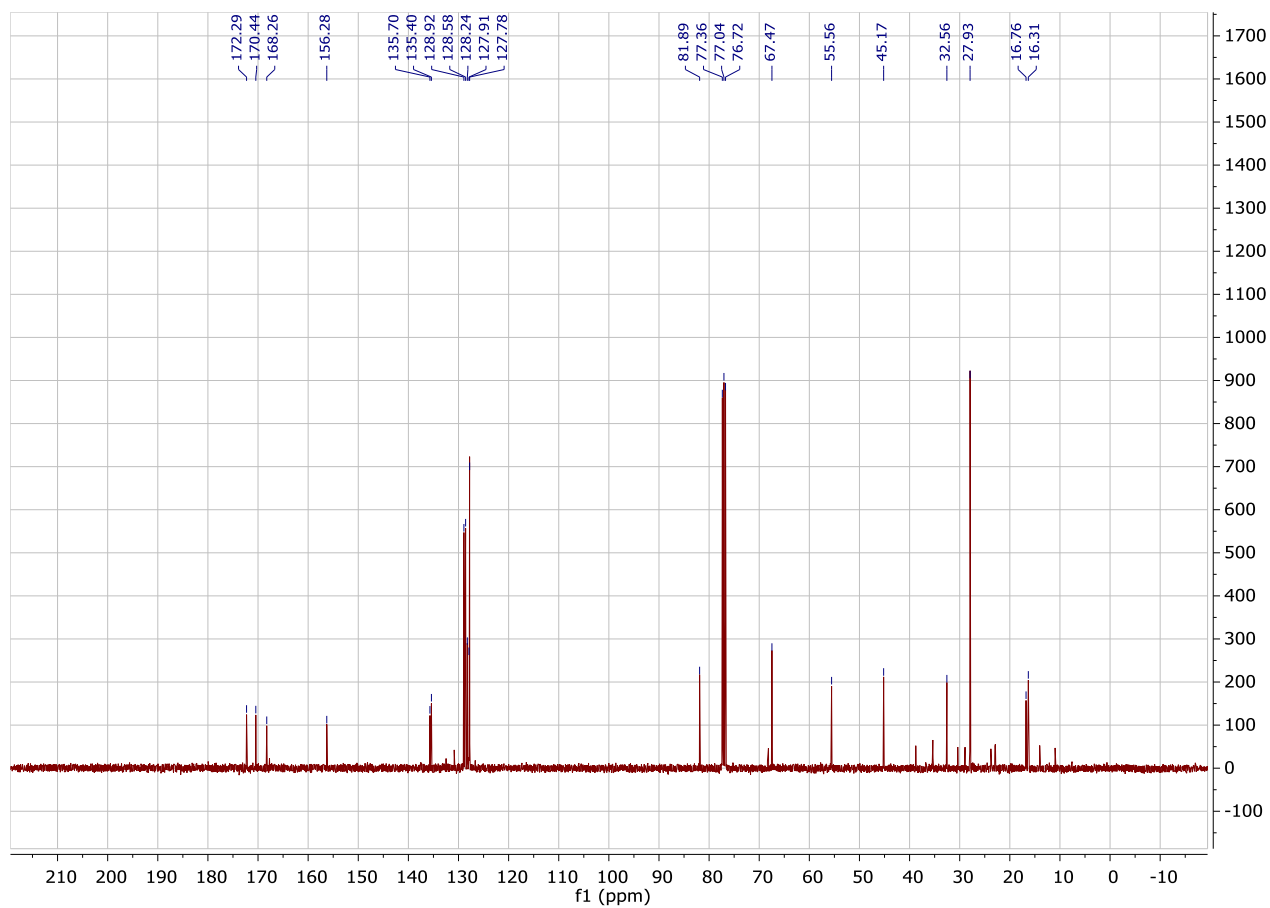

-L.G.S. - Laboratorio Grandi Strumenti - Display Report

Analysis Name av\_gc103.d  
Sample Name  
Comment 1 mg/ml dil 1:100 MeOH  
Richiedente: Cristina

Acquisition Date 12/12/18 15:30:33  
Method Copy of \_01tmix\_posneg  
Im.MS

Operator  
Instrument

Walter Panzeri  
esquire3000plus

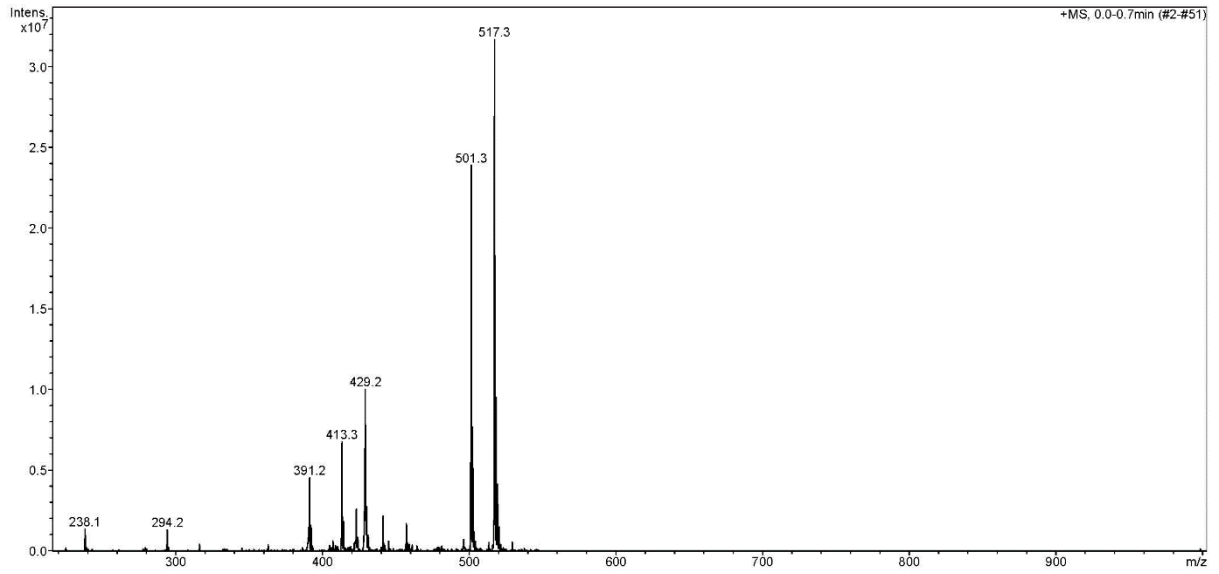



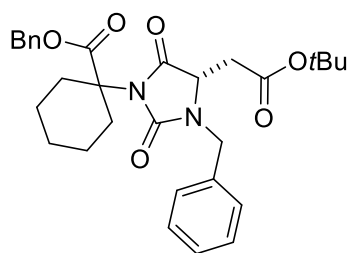

**5c**

$^1\text{H-NMR}$  (400 MHz,  $\text{CDCl}_3$ )

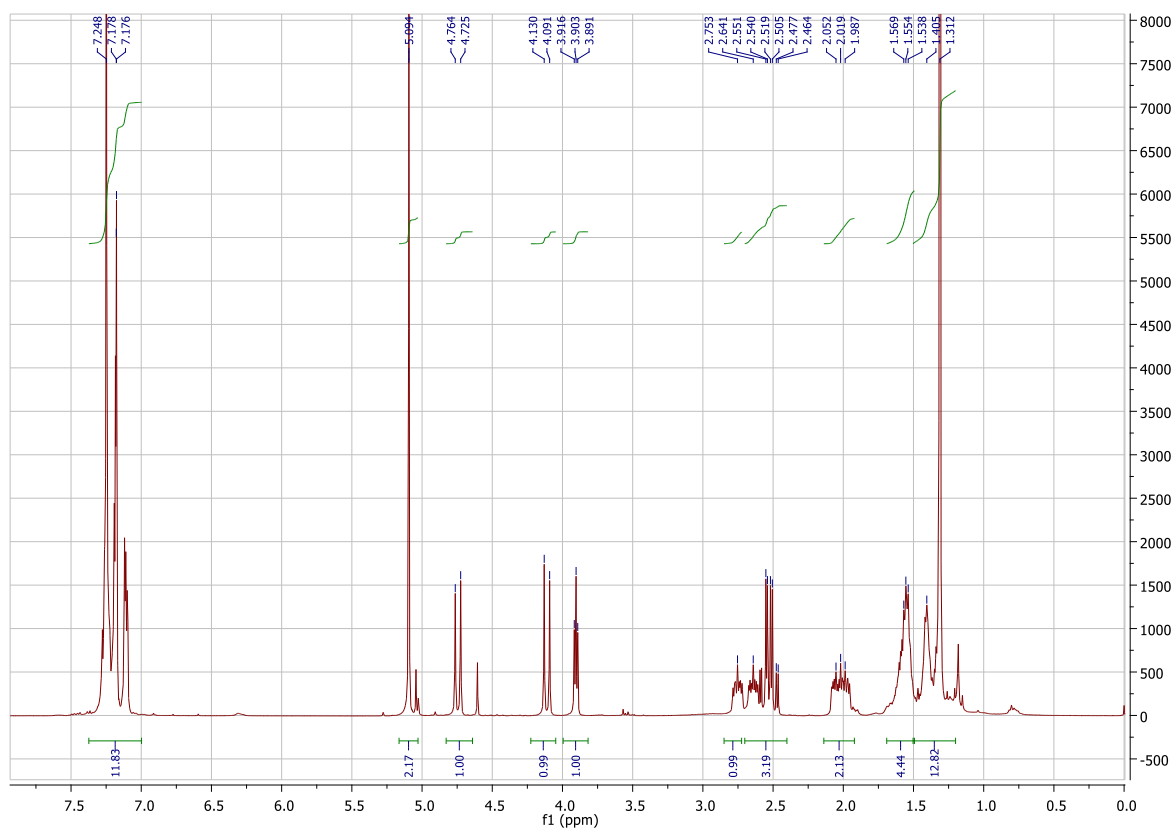



**5c**

$^{13}\text{C}\{^1\text{H}\}$ -NMR (101 MHz,  $\text{CDCl}_3$ )

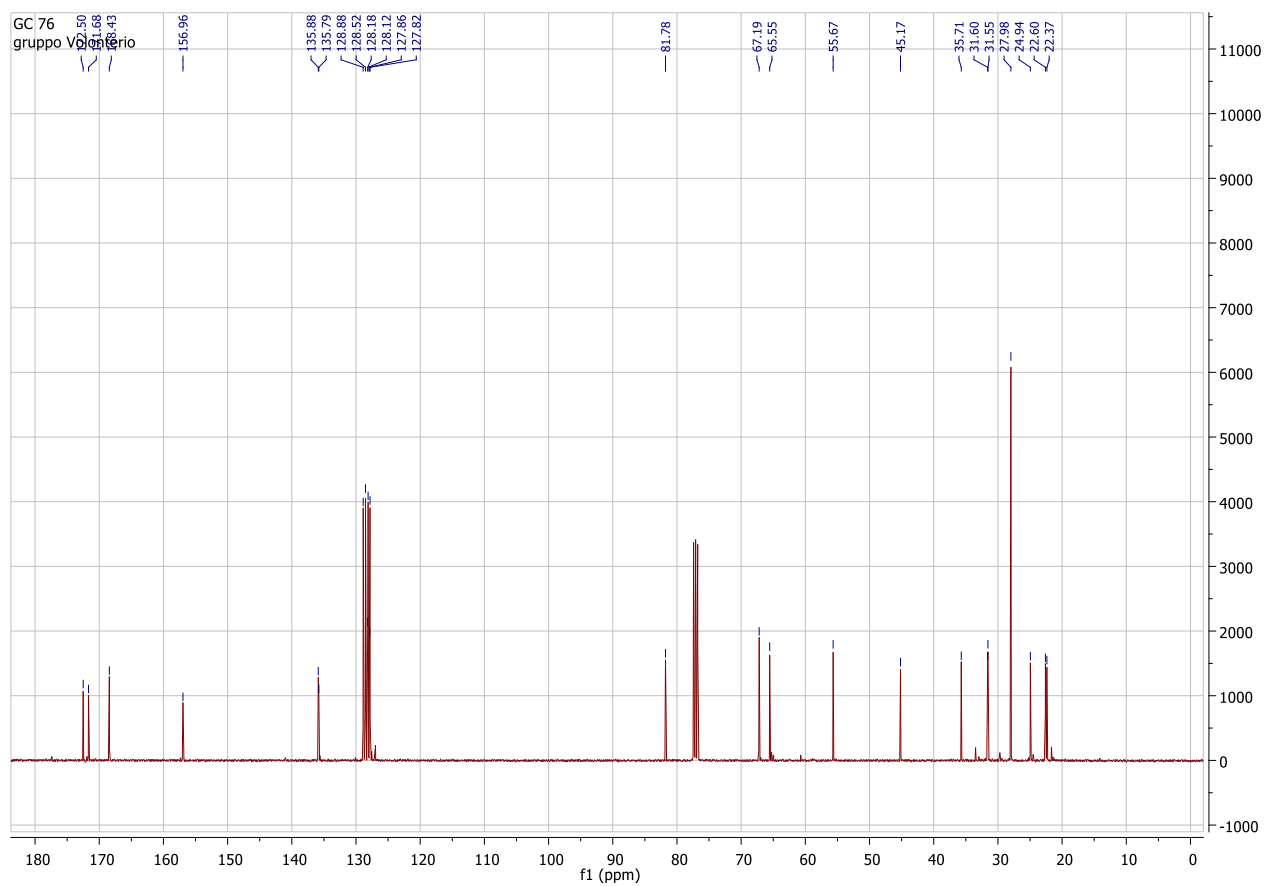

-L.G.S. - Laboratorio Grandi Strumenti - Display Report

Analysis Name av gc86.d  
Sample Name  
Comment 1 mg/ml dil 1:100 MeOH  
Richiedente: Cristina

Acquisition Date 10/04/18 15:39:51  
Method Copy of \_01tmix\_posneg  
lm.MS

Operator Walter Panzeri  
Instrument esquire3000plus

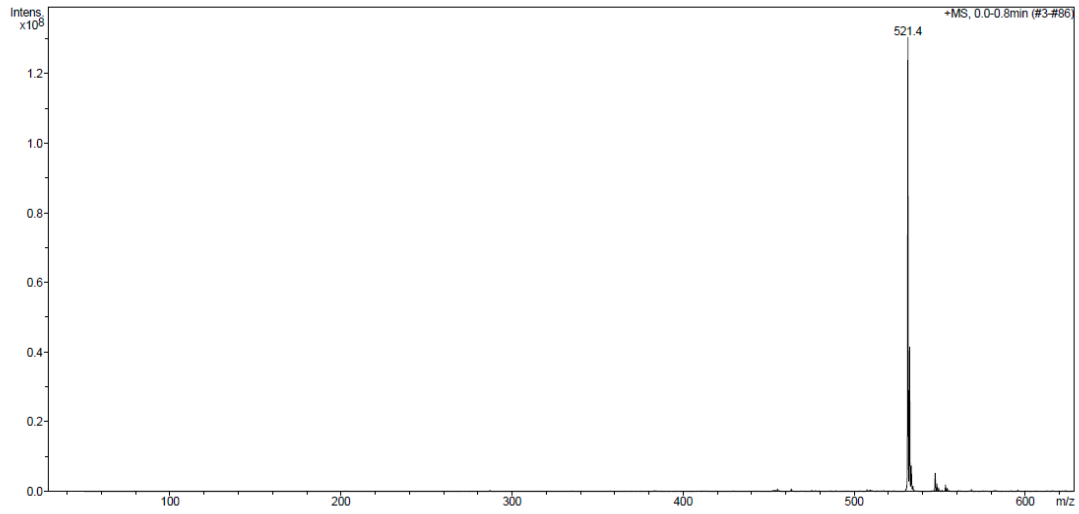

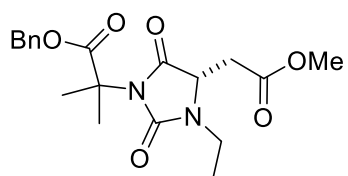

**5d**

$^1\text{H-NMR}$  (400 MHz,  $\text{dms}\text{-d}_6$ )

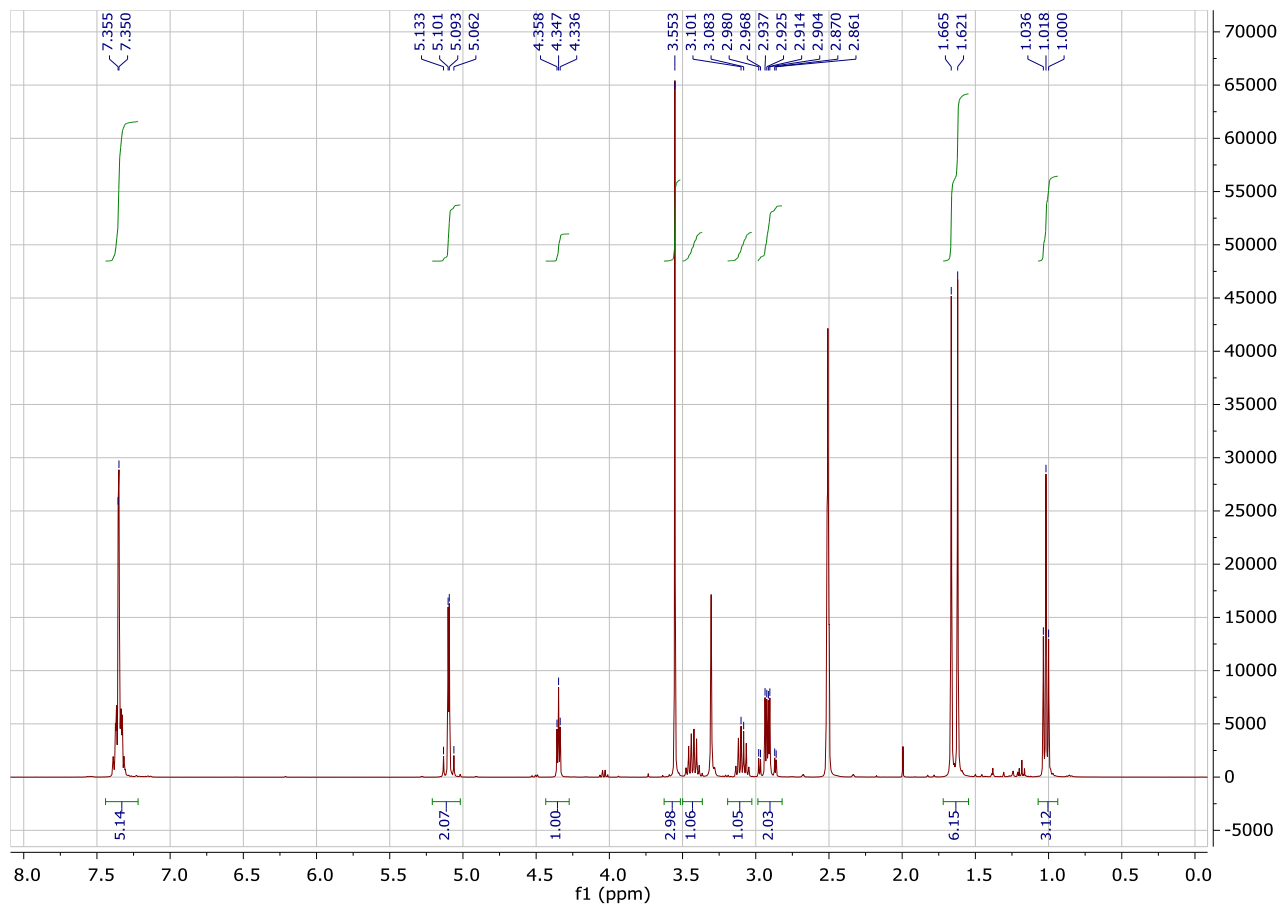

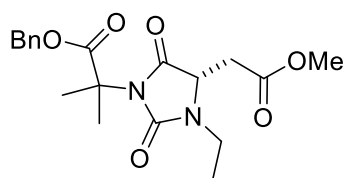

5d

$^{13}\text{C}\{^1\text{H}\}$ -NMR (101 MHz,  $\text{CDCl}_3$ )

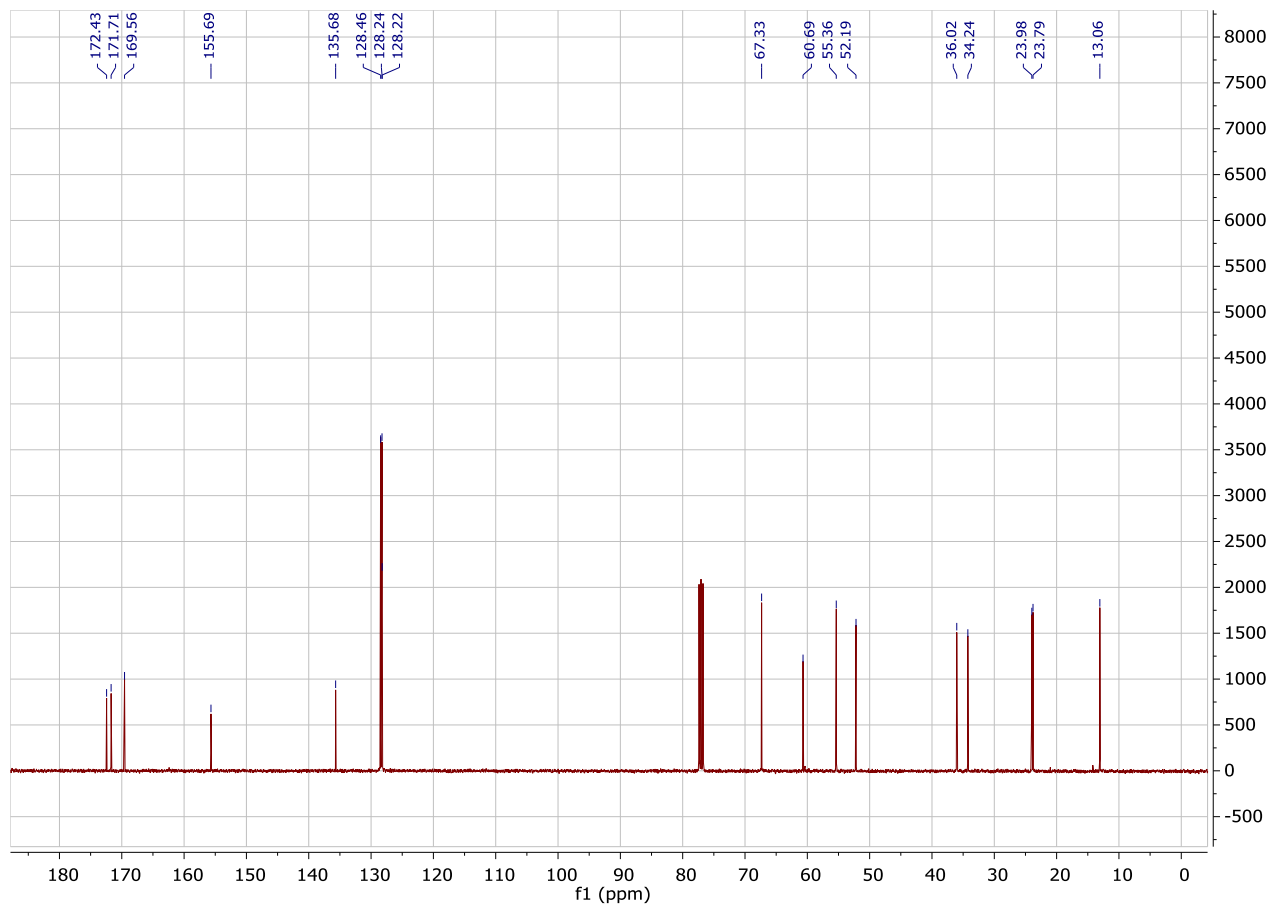

-L.G.S. - Laboratorio Grandi Strumenti - Display Report

|               |                                                         |                  |                        |            |                 |
|---------------|---------------------------------------------------------|------------------|------------------------|------------|-----------------|
| Analysis Name | av_gc18.d                                               | Acquisition Date | 01/17/18 14:38:06      | Operator   | Administrator   |
| Sample Name   |                                                         | Method           | Copy of _01tmix_posneg | Instrument | esquire3000plus |
| Comment       | 1 mg/ml dil:1:100 MeOH<br>Richiedente: Cristina Gaetano |                  |                        |            |                 |

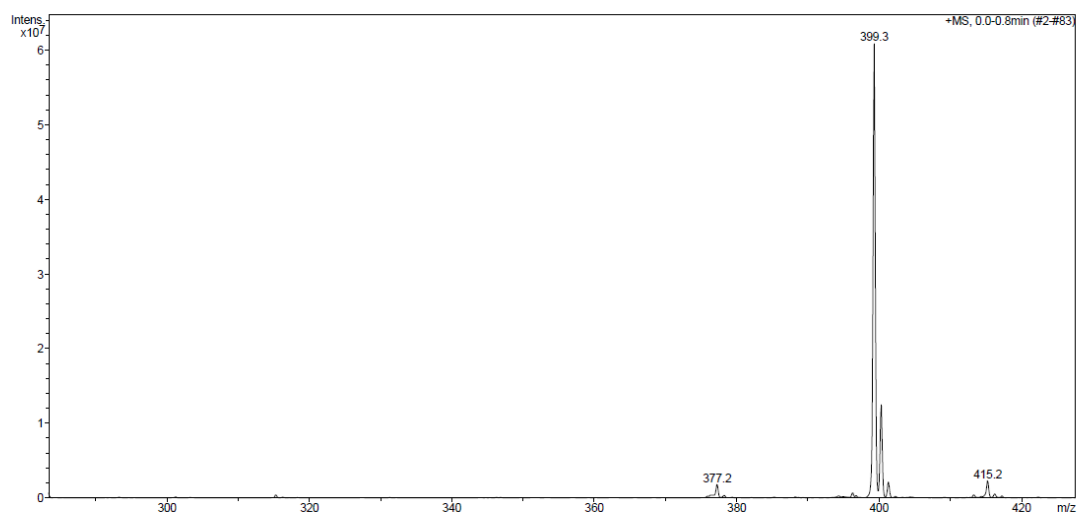

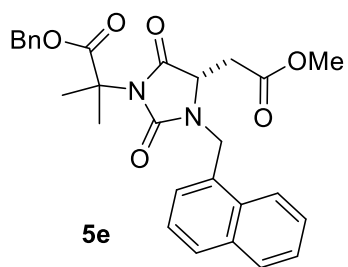

<sup>1</sup>H-NMR (400 MHz, CDCl<sub>3</sub>)

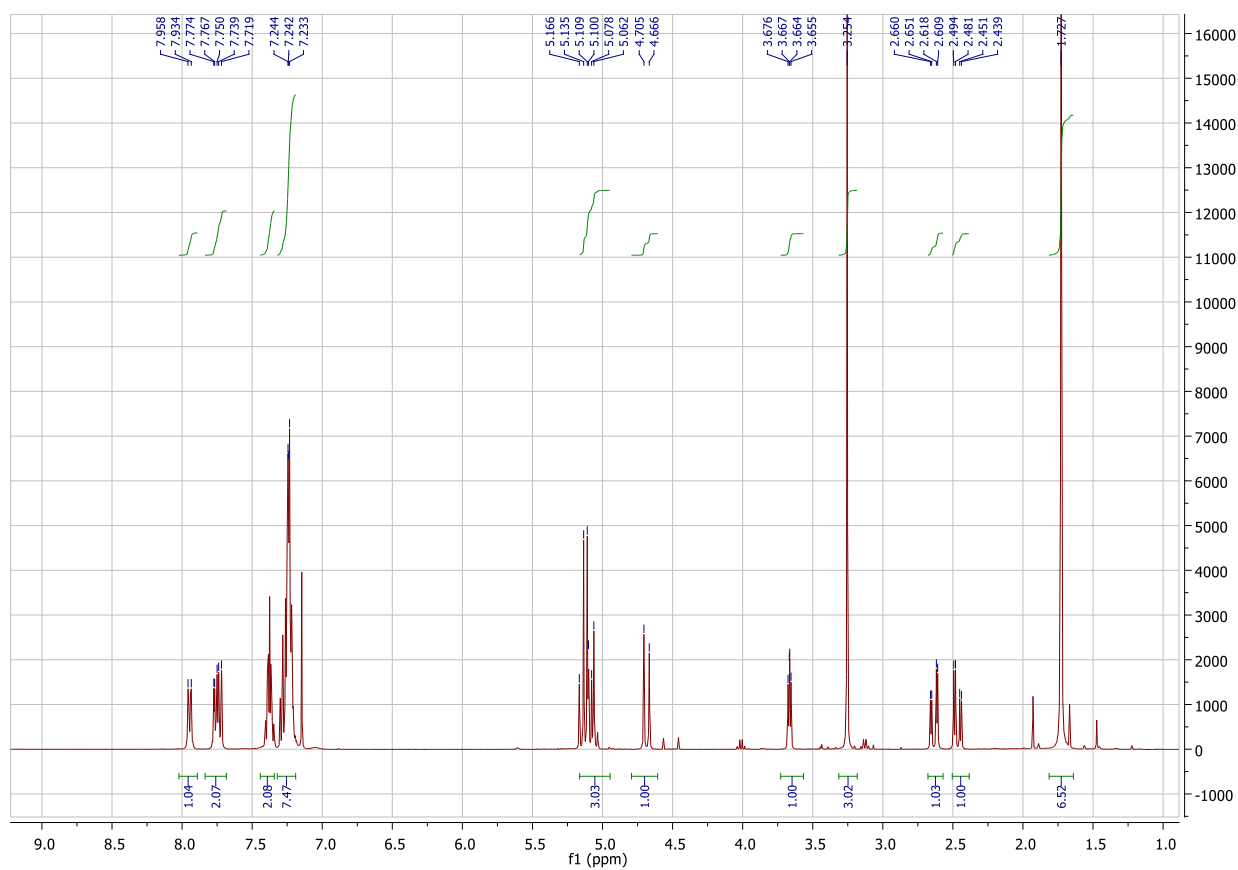



$^{13}\text{C}\{^1\text{H}\}$ -NMR (101 MHz,  $\text{CDCl}_3$ )

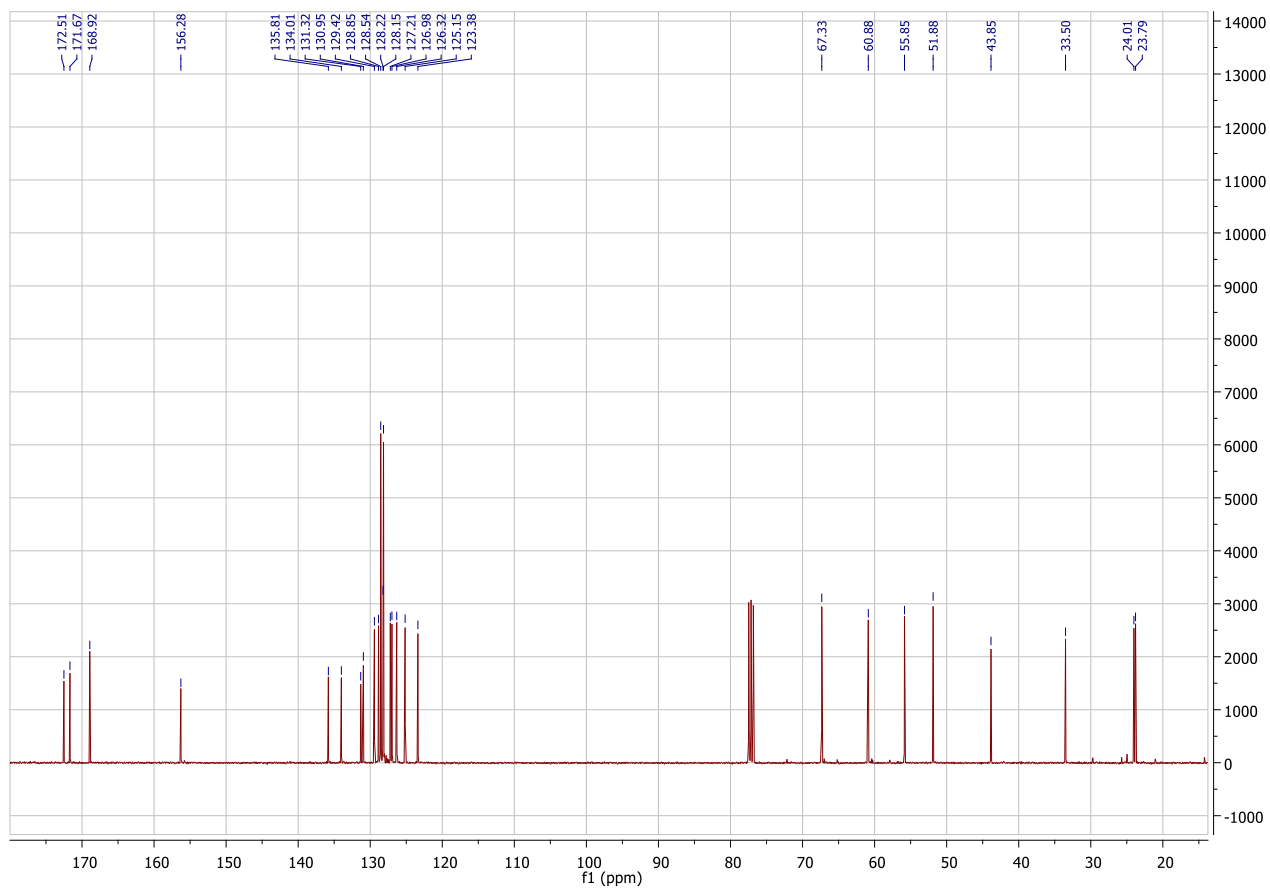



-L.G.S. - Laboratorio Grandi Strumenti - Display Report

Analysis Name av gc48.d  
Sample Name  
Comment 1 mg/ml dil 1:100 MeOH  
Richiedente: Cristina

Acquisition Date 05/18/18 10:45:14  
Method Copy of \_01tmix\_posneg  
Im.MS

Operator Walter Panzeri  
Instrument esquire3000plus

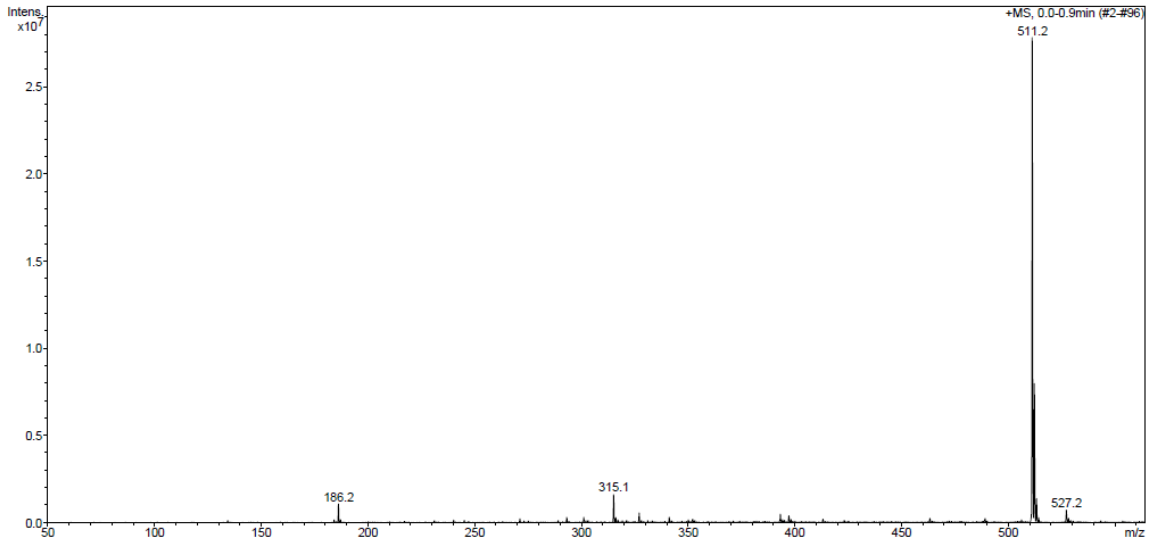

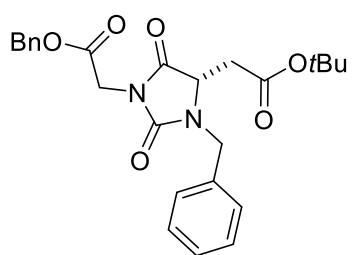

**5f**

$^1\text{H-NMR}$  (400 MHz,  $\text{CDCl}_3$ )

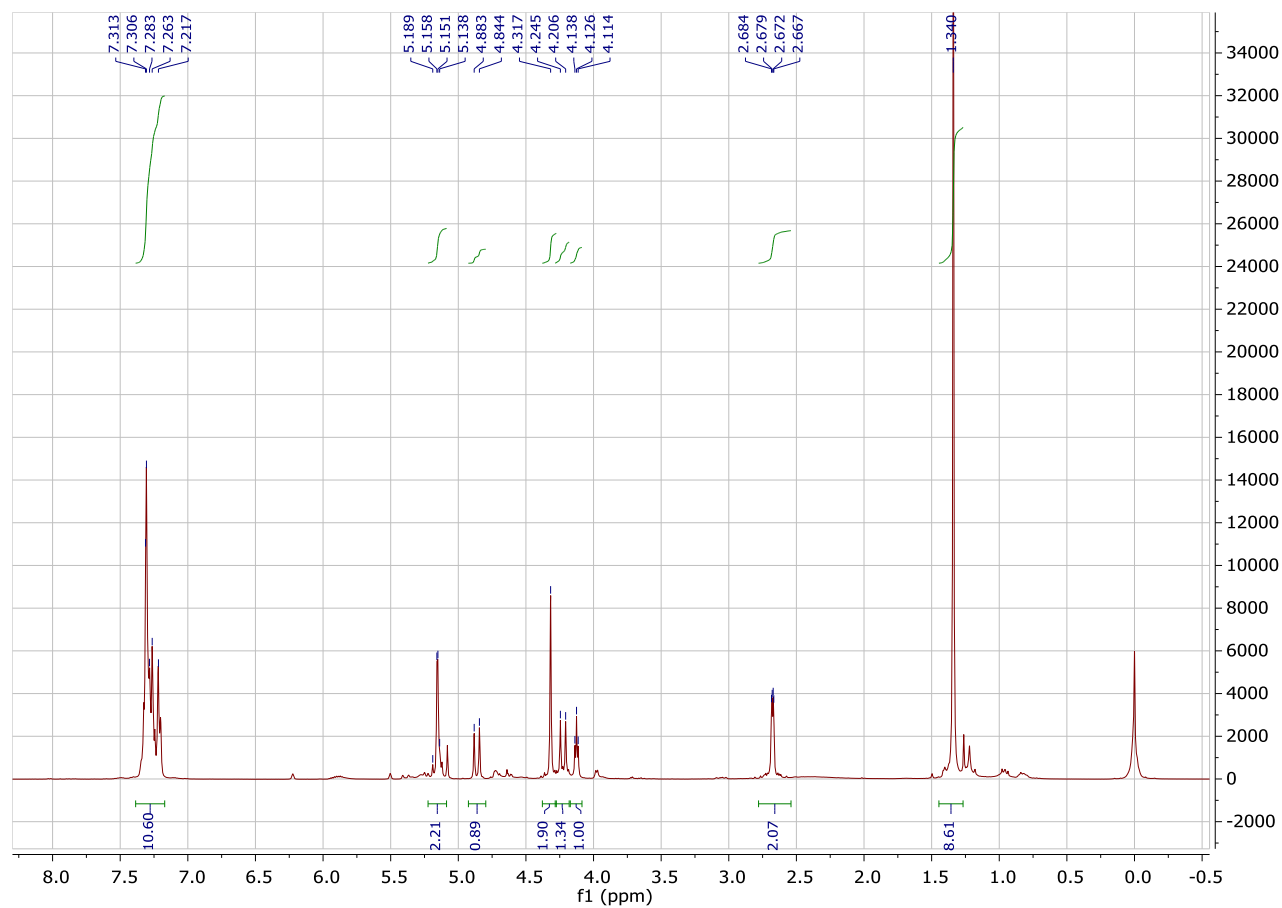

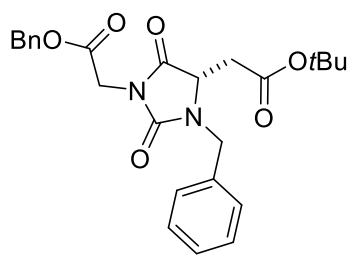

**5f**

<sup>13</sup>C{<sup>1</sup>H}-NMR (101 MHz, CDCl<sub>3</sub>)

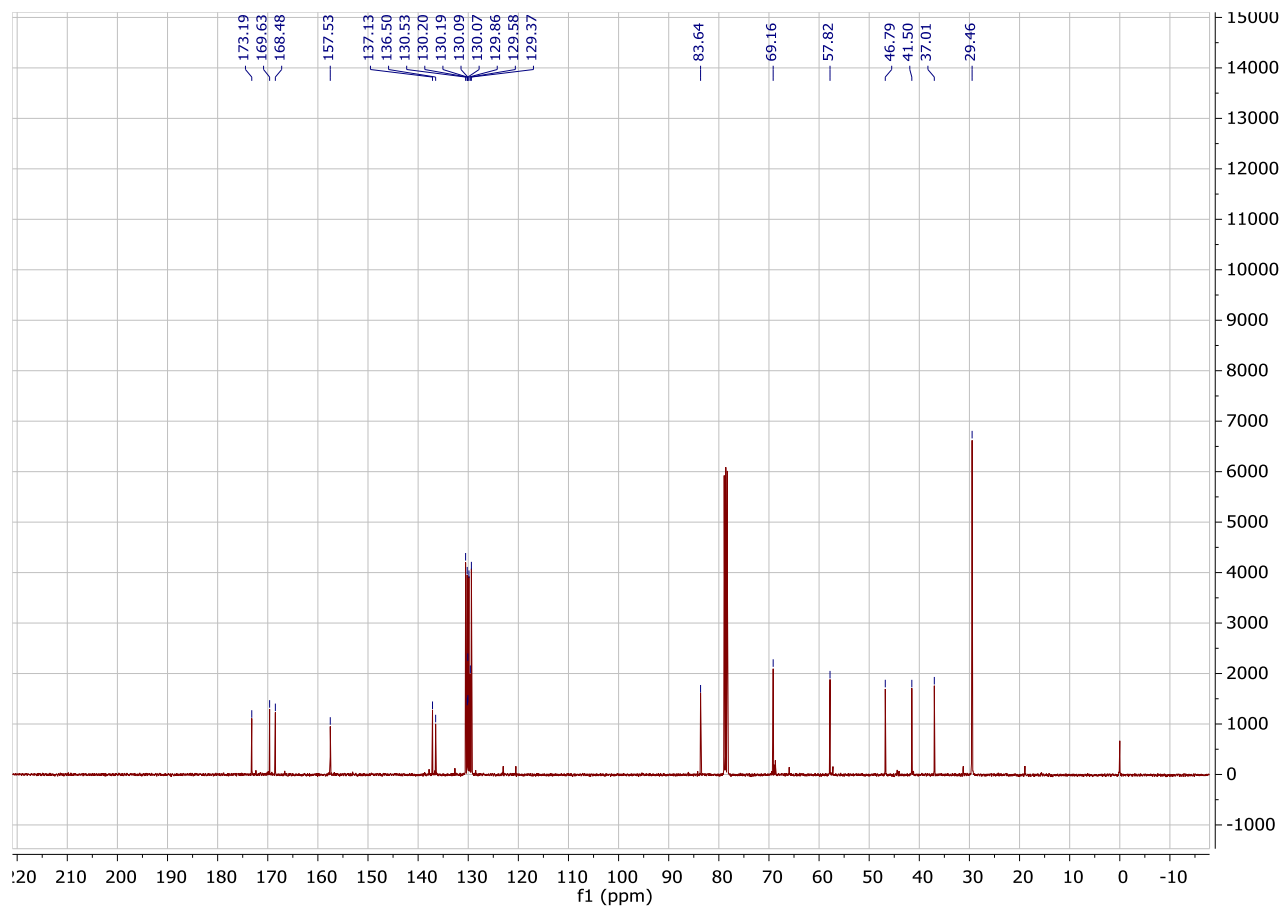

-L.G.S. - Laboratorio Grandi Strumenti - Display Report

Analysis Name av ac050p.d Acquisition Date 07/12/22 13:16:09 Operator Walter Panzeri  
Sample Name Method Copy of Sopt0622.MS Instrument esquire3000plus  
Comment 1 mg/mL dil 1:100 MeOH Richiedente: Caramiello

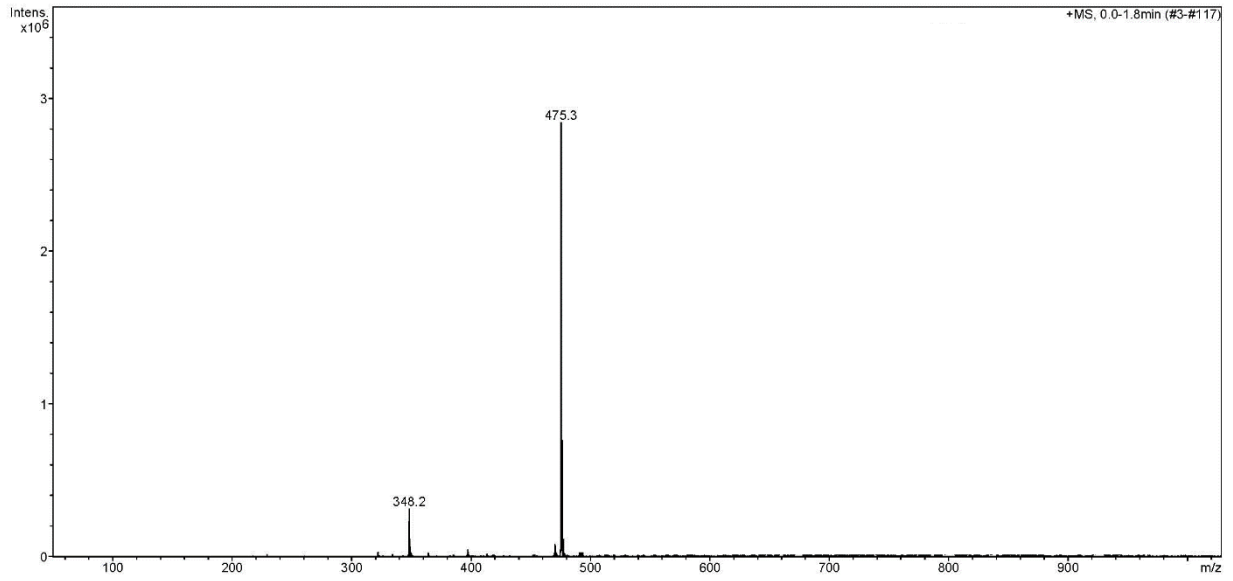

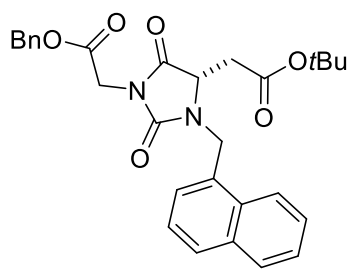

5g

$^1\text{H-NMR}$  (400 MHz,  $\text{CDCl}_3$ )

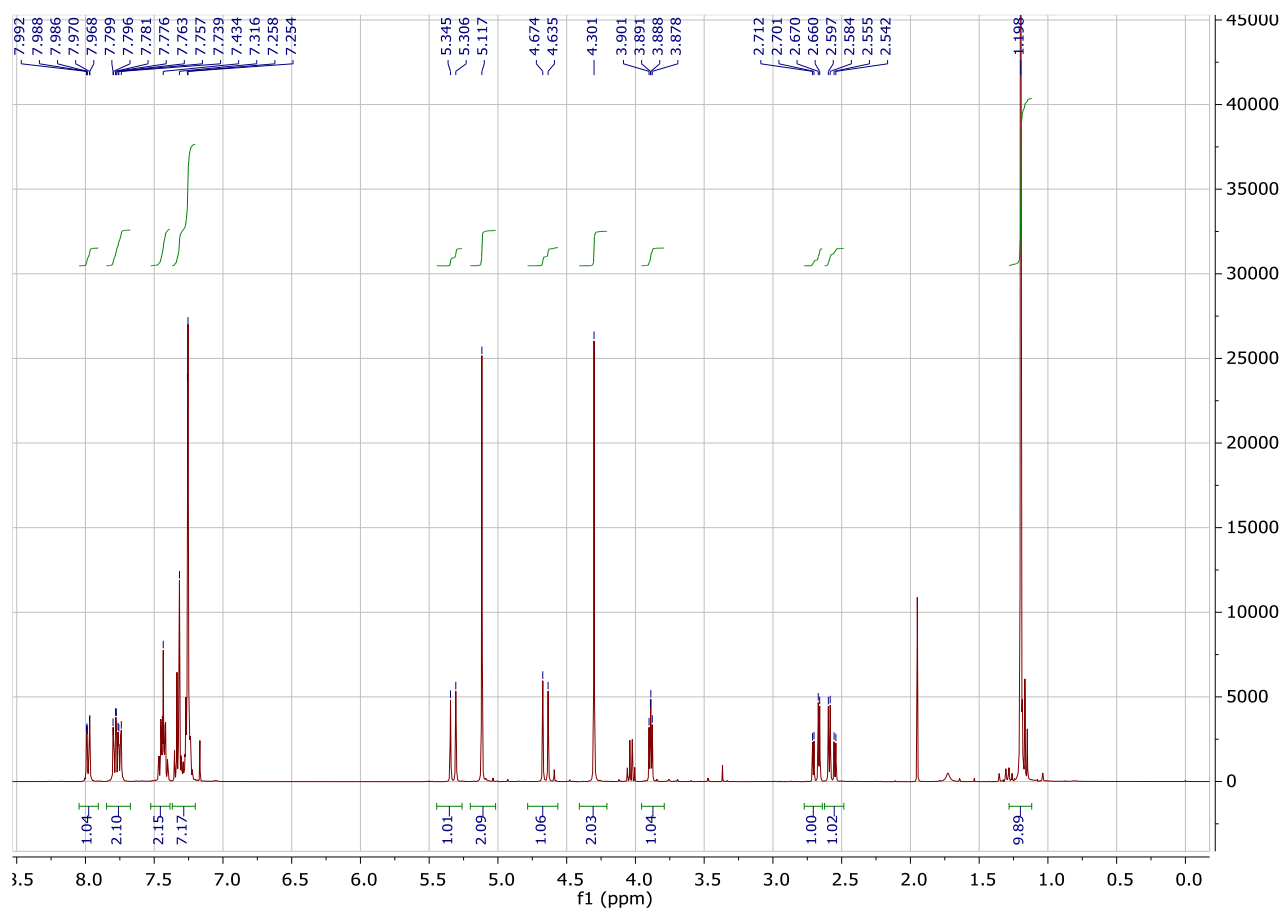

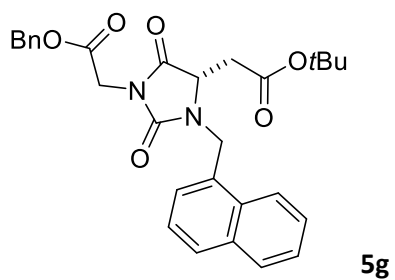

$^{13}\text{C}\{^1\text{H}\}$ -NMR (101 MHz,  $\text{CDCl}_3$ )

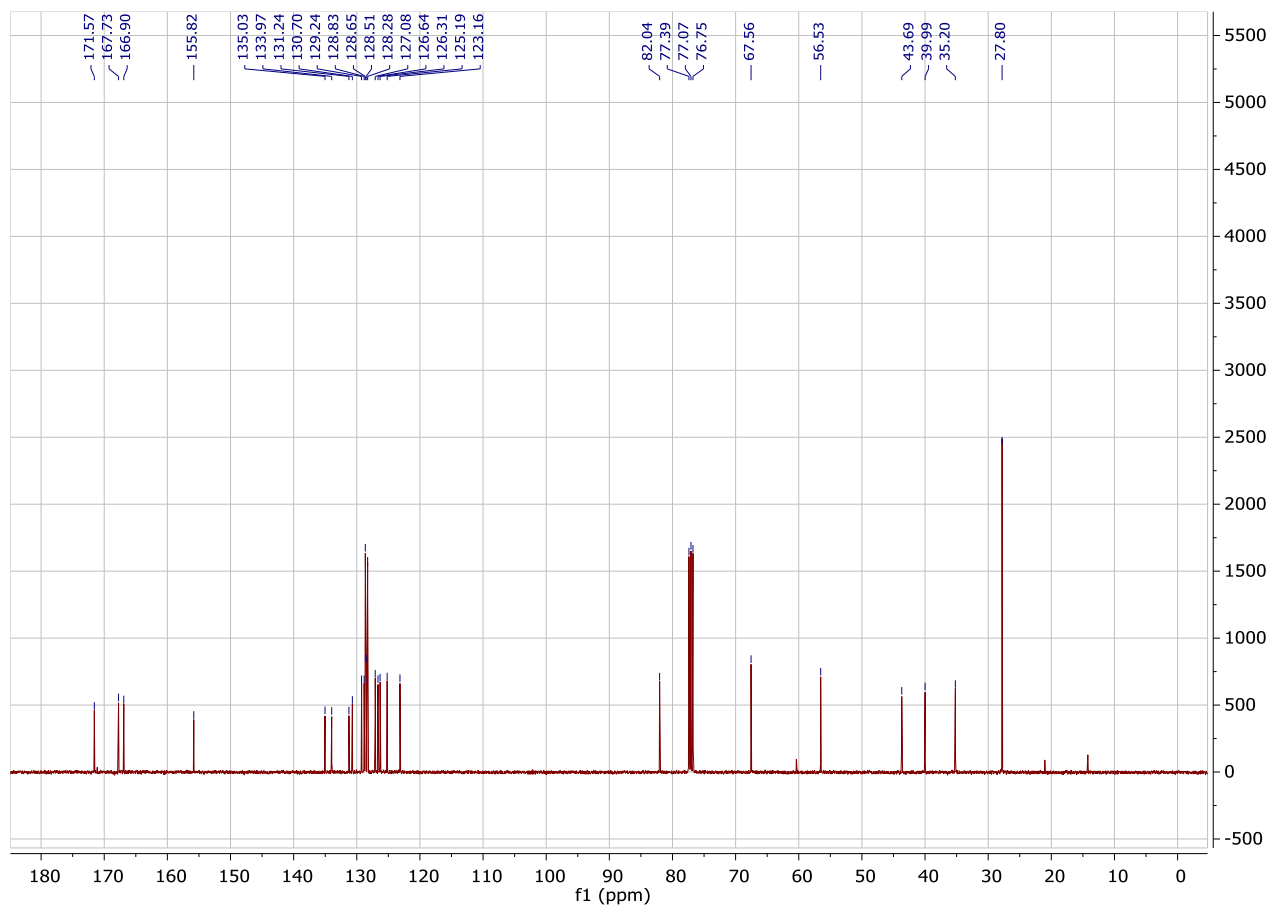

-L.G.S. - Laboratorio Grandi Strumenti - Display Report

Analysis Name av ac067.d  
Sample Name  
Comment 1mg/ml dil 1:100 MeOH  
Richiedente: Caramiello

Acquisition Date 07/24/20 16:24:44  
Method Copy of \_01tmix\_posneg  
lm.MS

Operator  
Instrument

Administrator  
esquire3000plus

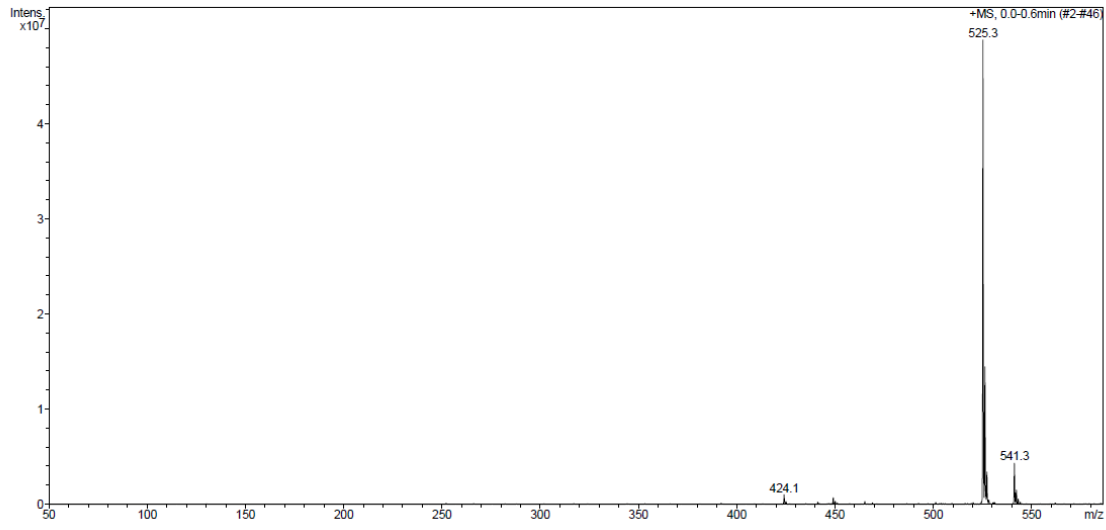

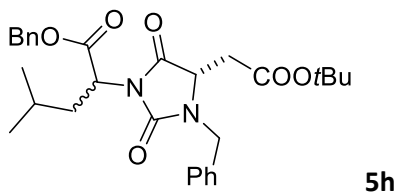

$^1\text{H-NMR}$  (400 MHz,  $\text{CDCl}_3$ )

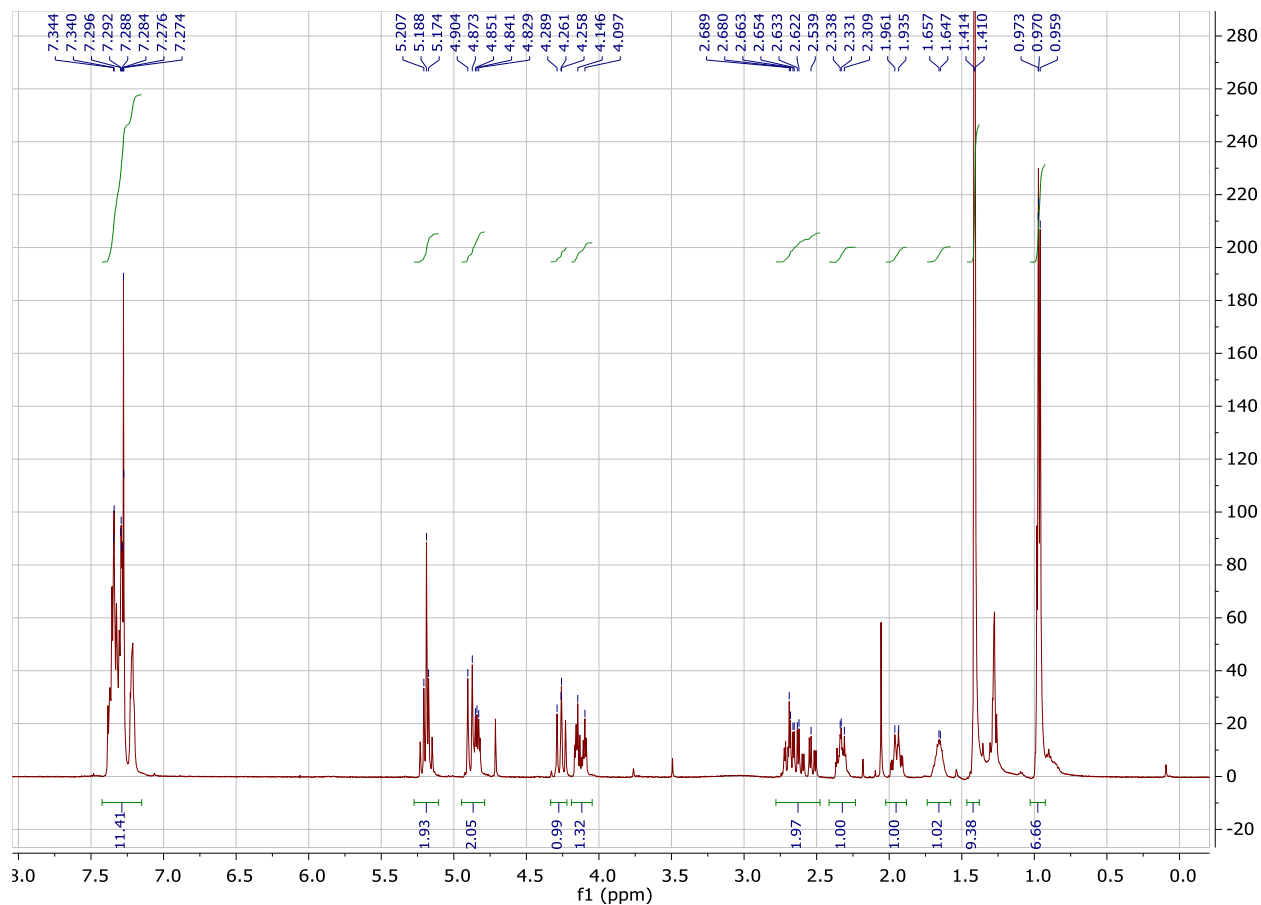



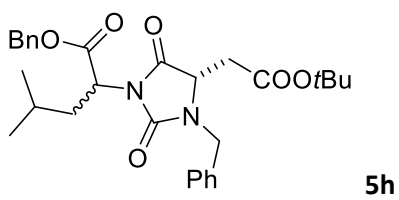

$^{13}\text{C}\{^1\text{H}\}$ -NMR (101 MHz,  $\text{CDCl}_3$ )

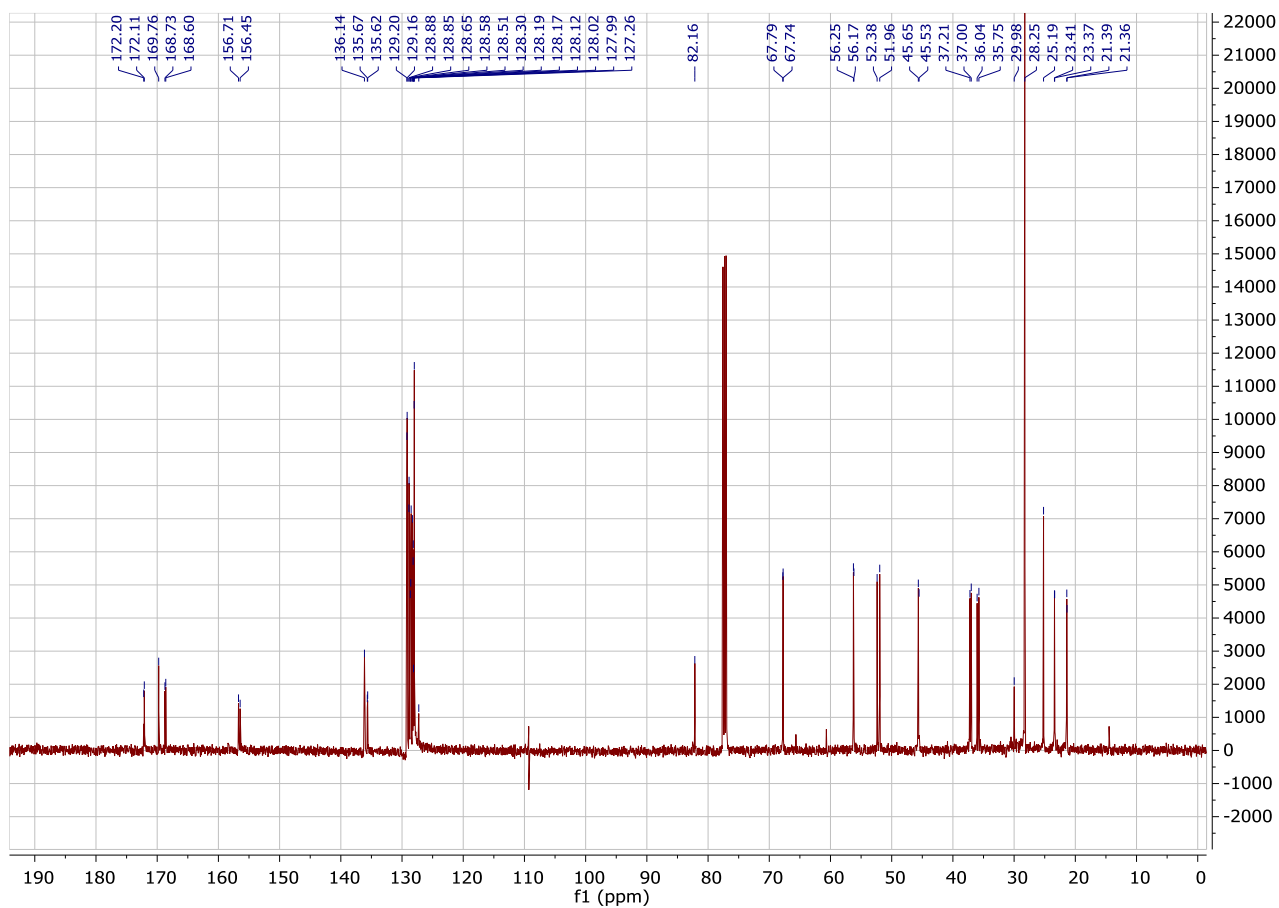

-L.G.S. - Laboratorio Grandi Strumenti - Display Report

Analysis Name av gc91.d  
Sample Name  
Comment 1 mg/ml dil 1:100 MeOH  
Richiedente: Cristina

Acquisition Date 10/26/18 15:28:52  
Method Copy of \_01tmix\_posneg  
Im.MS

Operator  
Instrument

Walter Panzeri  
esquire3000plus

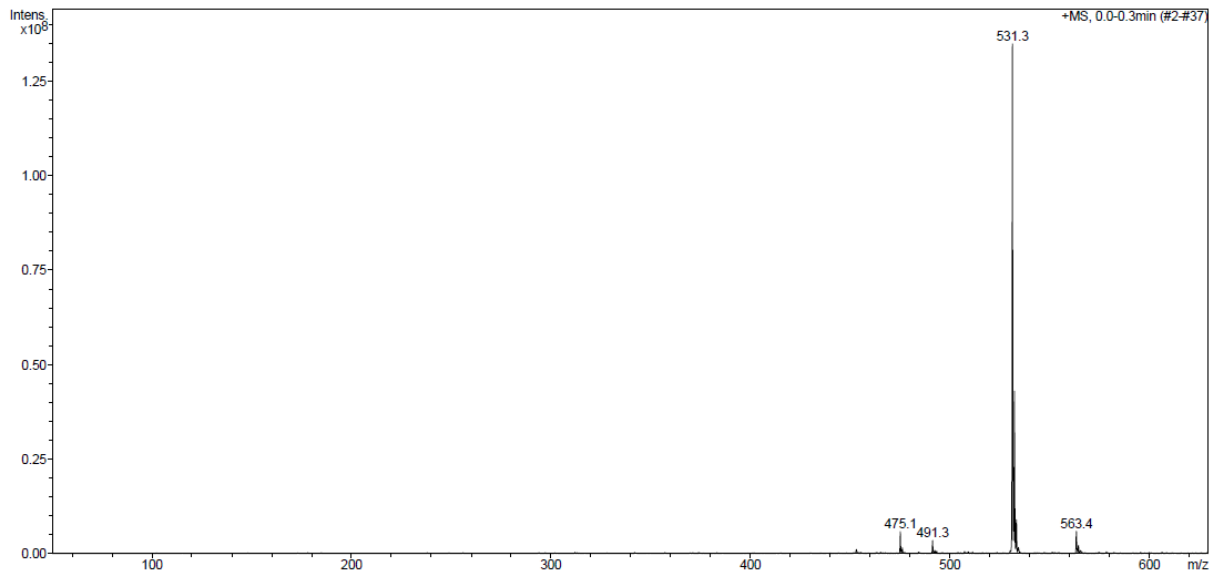

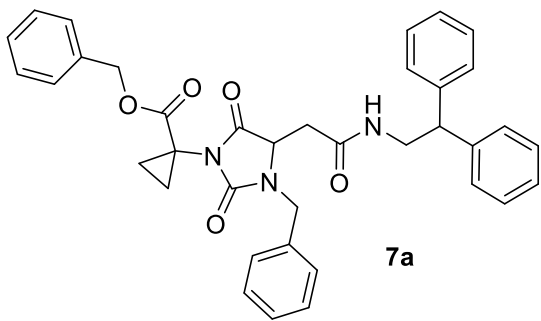

$^1\text{H-NMR}$  (400 MHz,  $\text{CDCl}_3$ )

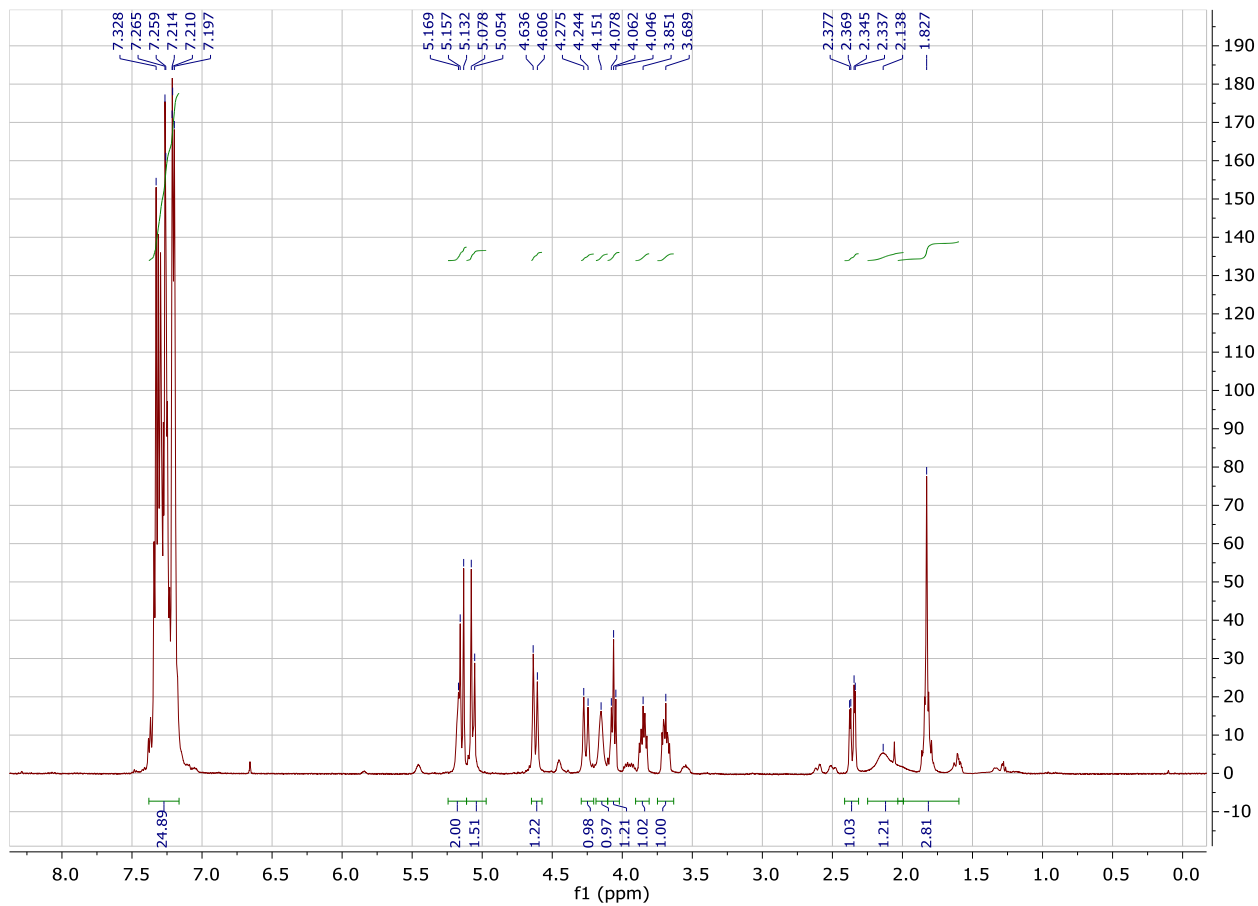



$^{13}\text{C}\{^1\text{H}\}$ -NMR (101 MHz,  $\text{CDCl}_3$ )

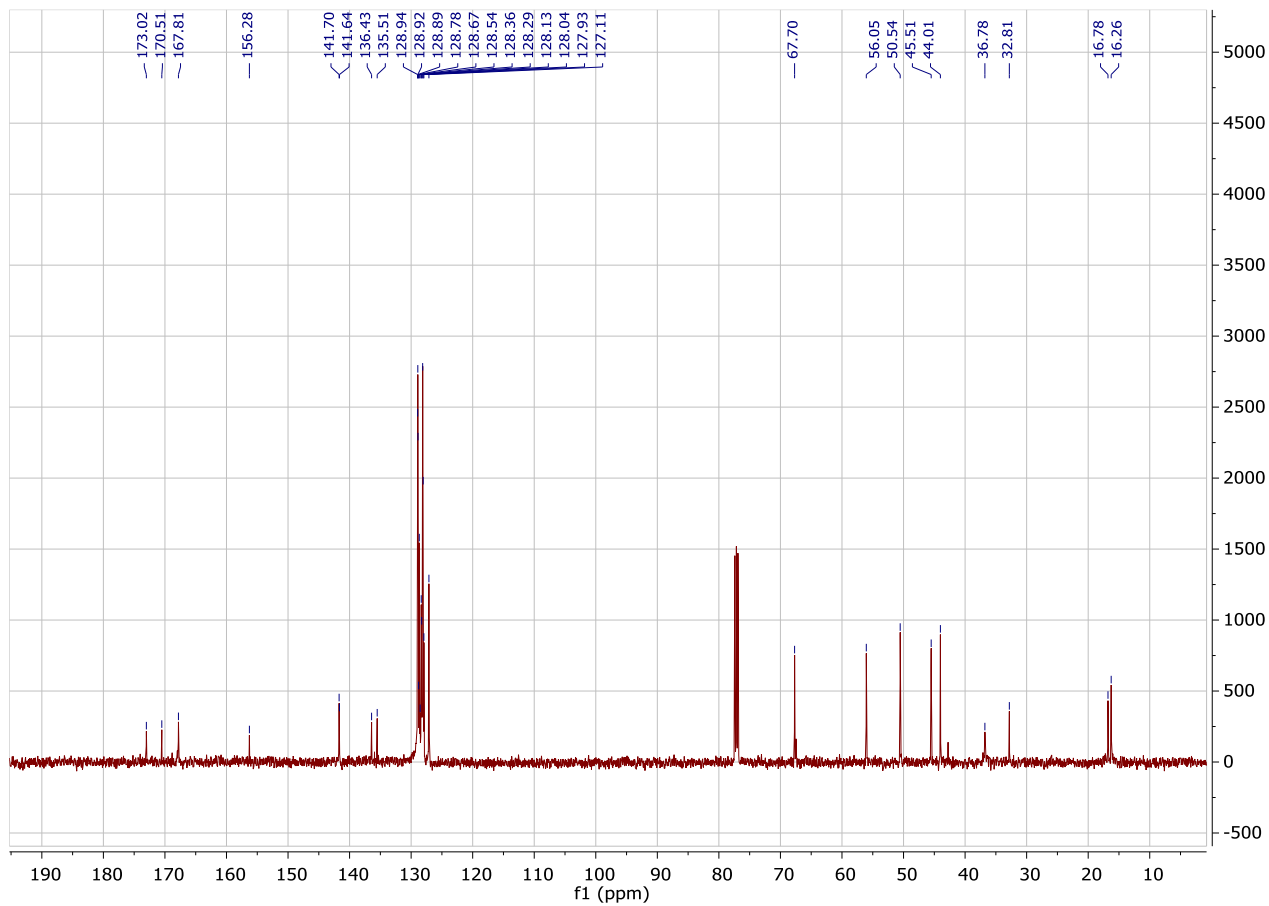

-L.G.S. - Laboratorio Grandi Strumenti - Display Report

Analysis Name av fm2840.d  
Sample Name  
Comment 1 mg/ml dil 1:100 MeOH  
Richiedente: Frigerio

Acquisition Date 06/19/17 12:09:26  
Method Copy of \_01tmix\_posneg  
Im.MS

Operator  
Instrument Administrator  
esquire3000plus

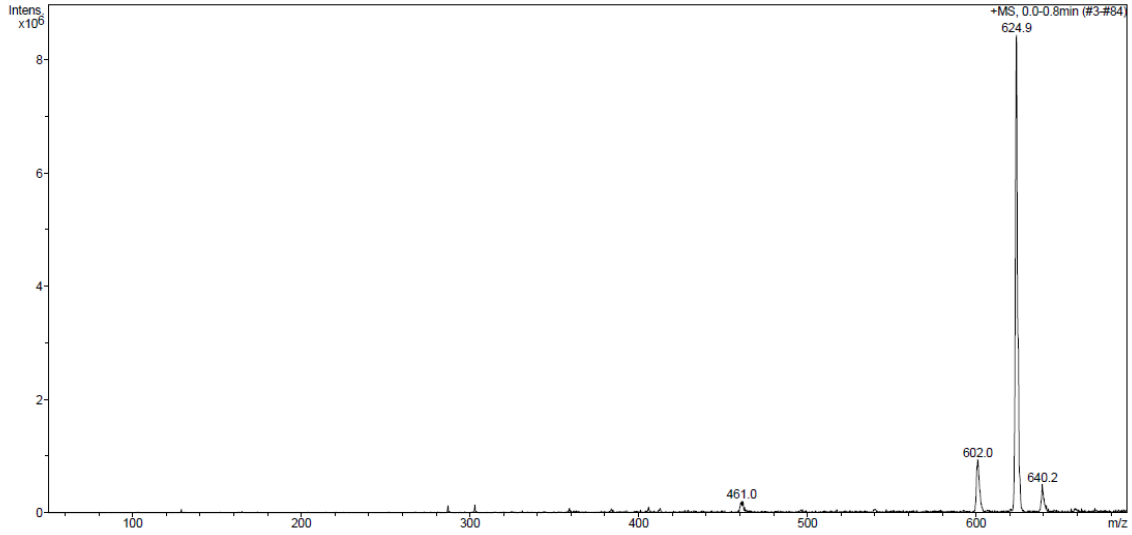

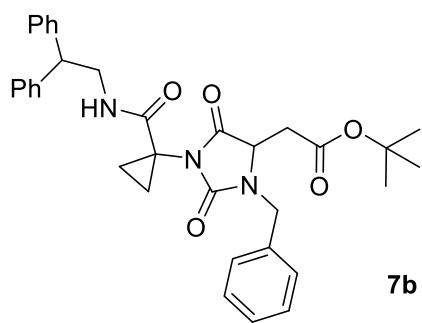

$^1\text{H-NMR}$  (400 MHz,  $\text{CDCl}_3$ )

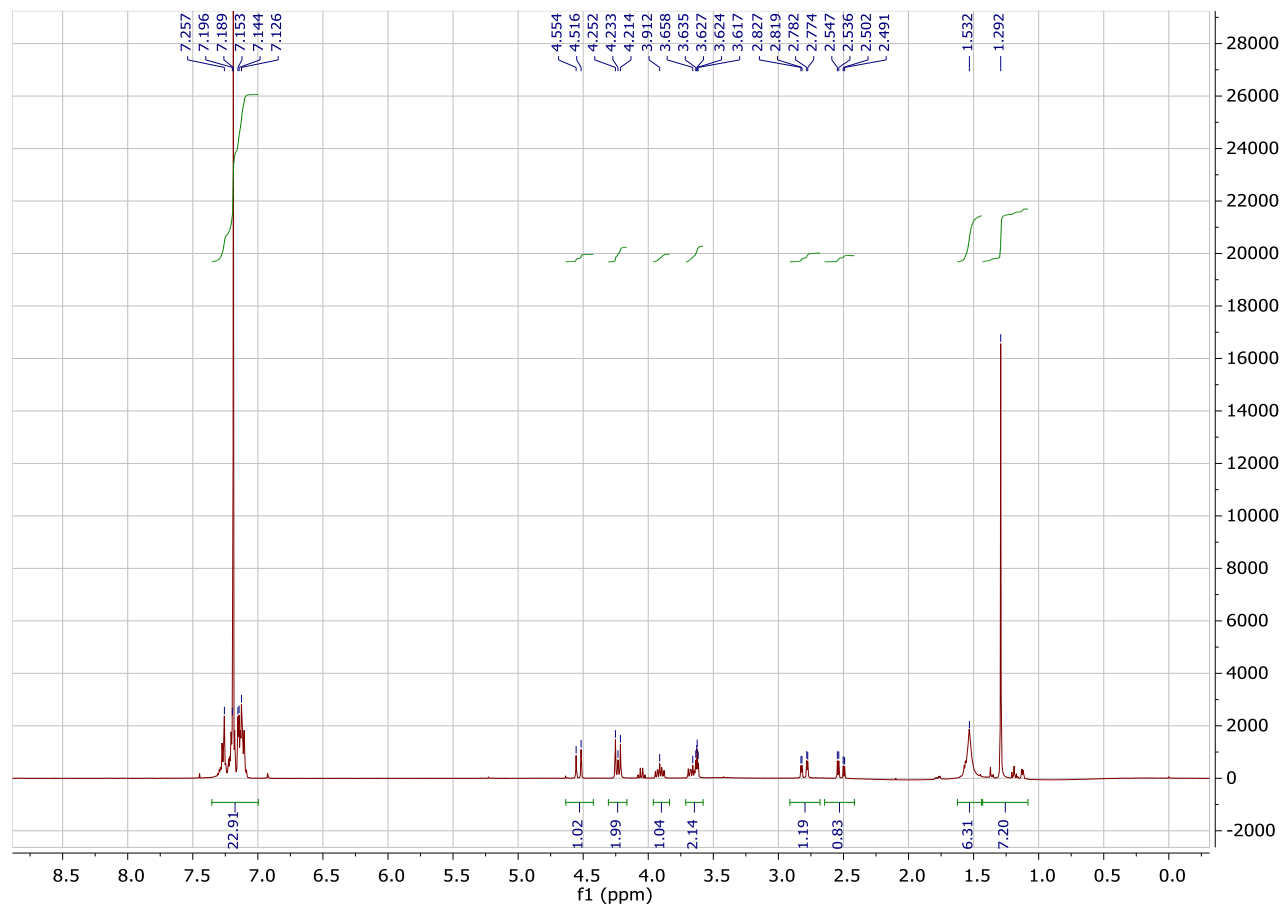



$^{13}\text{C}\{^1\text{H}\}$ -NMR (101 MHz,  $\text{CDCl}_3$ )

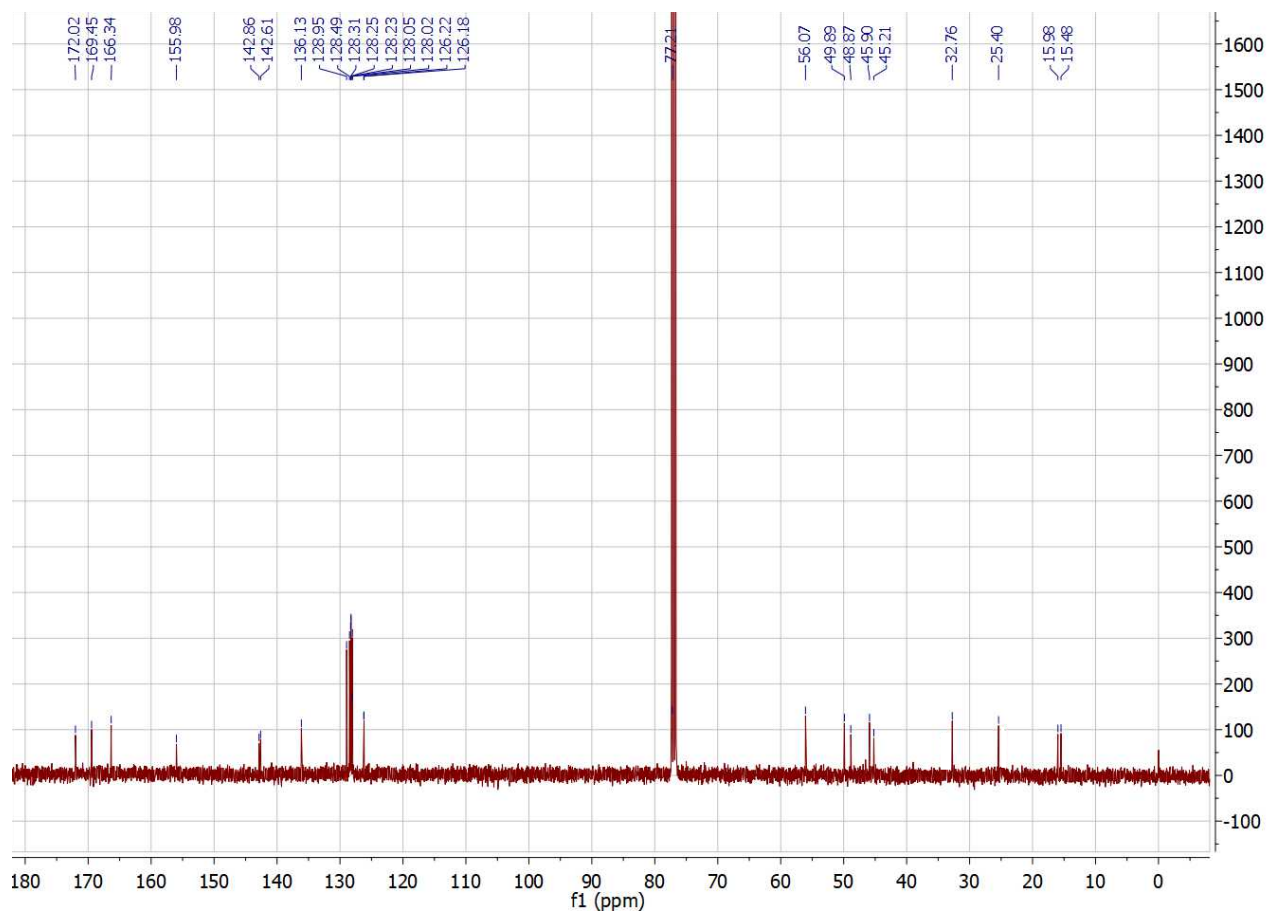

-L.G.S. - Laboratorio Grandi Strumenti - Display Report

|               |                                                |                  |                        |            |                 |
|---------------|------------------------------------------------|------------------|------------------------|------------|-----------------|
| Analysis Name | av gc132.d                                     | Acquisition Date | 07/01/19 14:41:30      | Operator   | Walter Panzeri  |
| Sample Name   |                                                | Method           | Copy of _01tmix_posneg | Instrument | esquire3000plus |
| Comment       | 1mg/ml dil 1:100 MeOH<br>Richiedente: Cristina |                  | Im.MS                  |            |                 |

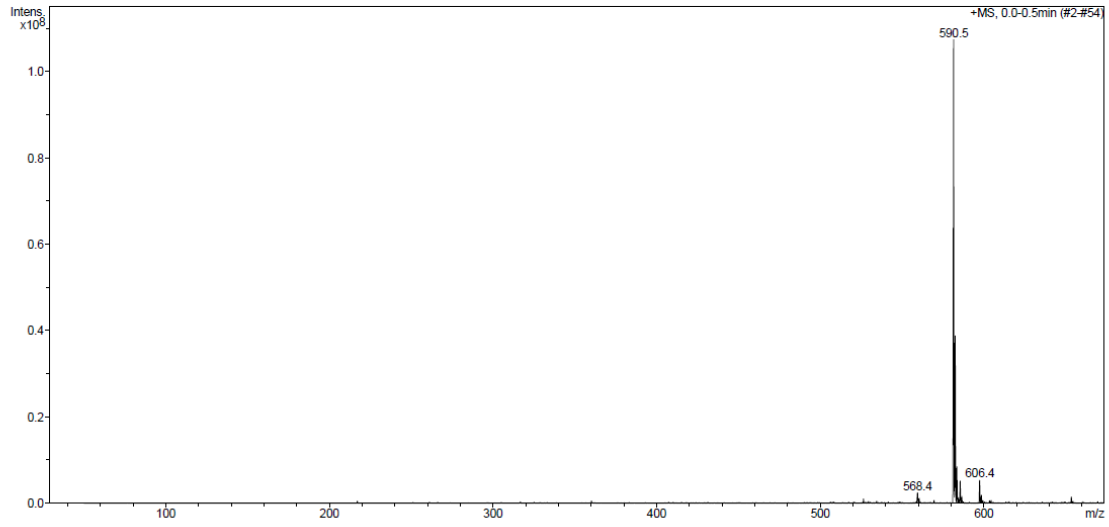



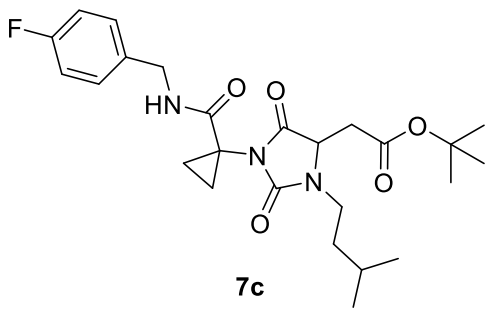

$^1\text{H-NMR}$  (400 MHz,  $\text{CDCl}_3$ )

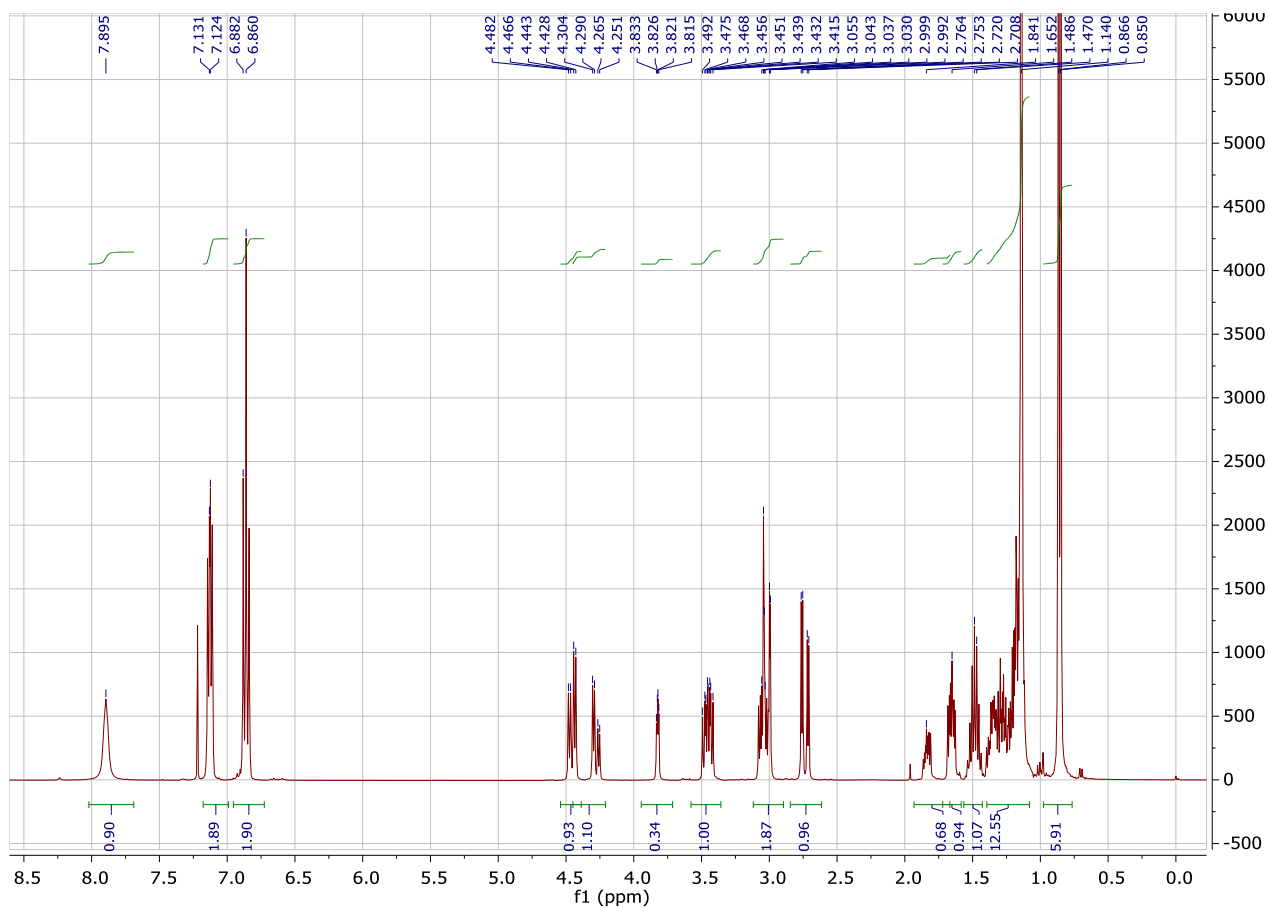



$^{13}\text{C}\{^1\text{H}\}$ -NMR (101 MHz,  $\text{CDCl}_3$ )

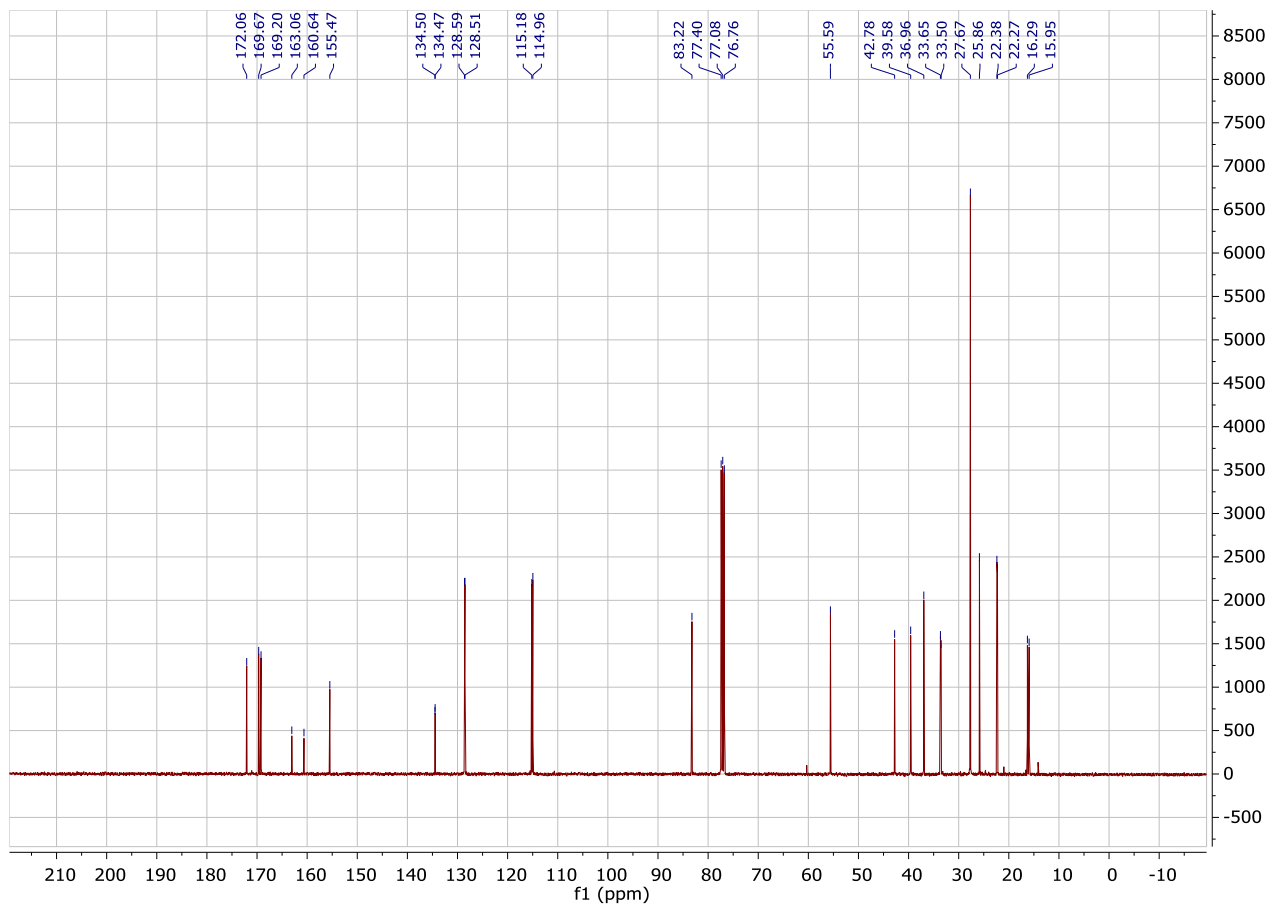

-L.G.S. - Laboratorio Grandi Strumenti - Display Report

Analysis Name av gc120.d  
Sample Name  
Comment 1 mg/ml dil 1:100 MeOH  
Richiedente: Cristina

Acquisition Date 04/05/19 13:14:49  
Method Copy of \_01tmix\_posneg  
In.MS

Operator Walter Panzeri  
Instrument esquire3000plus

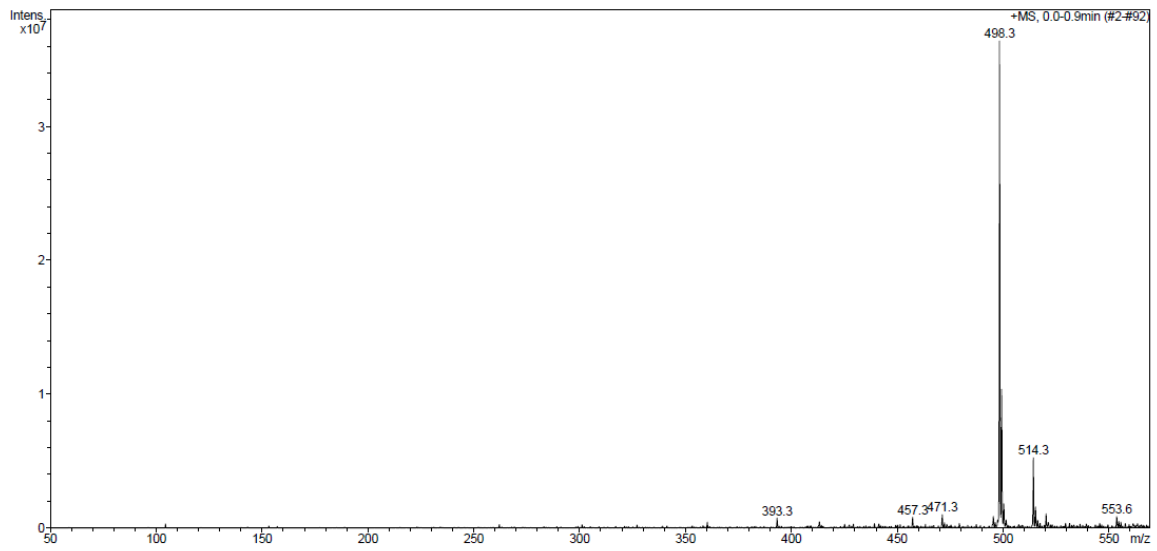

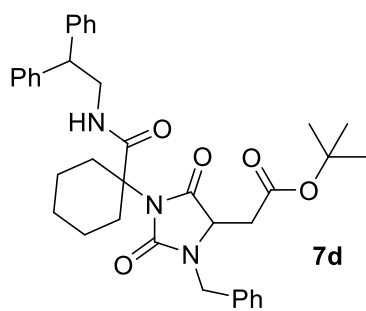

$^1\text{H-NMR}$  (400 MHz,  $\text{CDCl}_3$ )

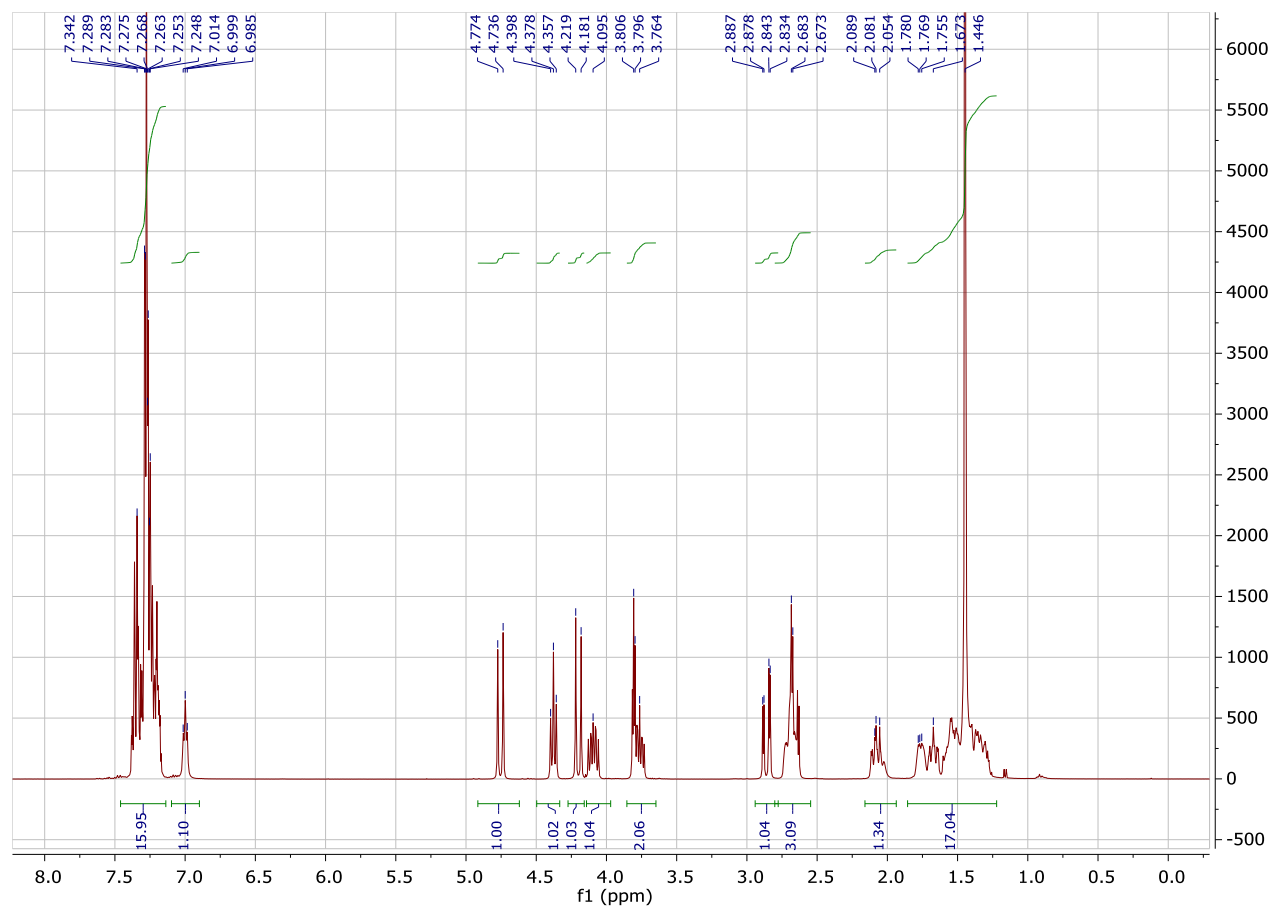

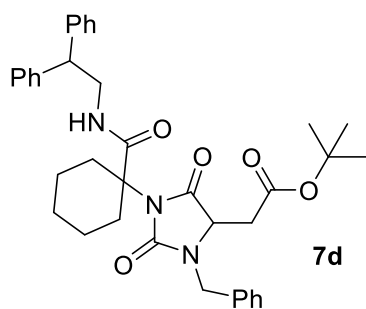

$^{13}\text{C}\{^1\text{H}\}$ -NMR (101 MHz,  $\text{CDCl}_3$ )

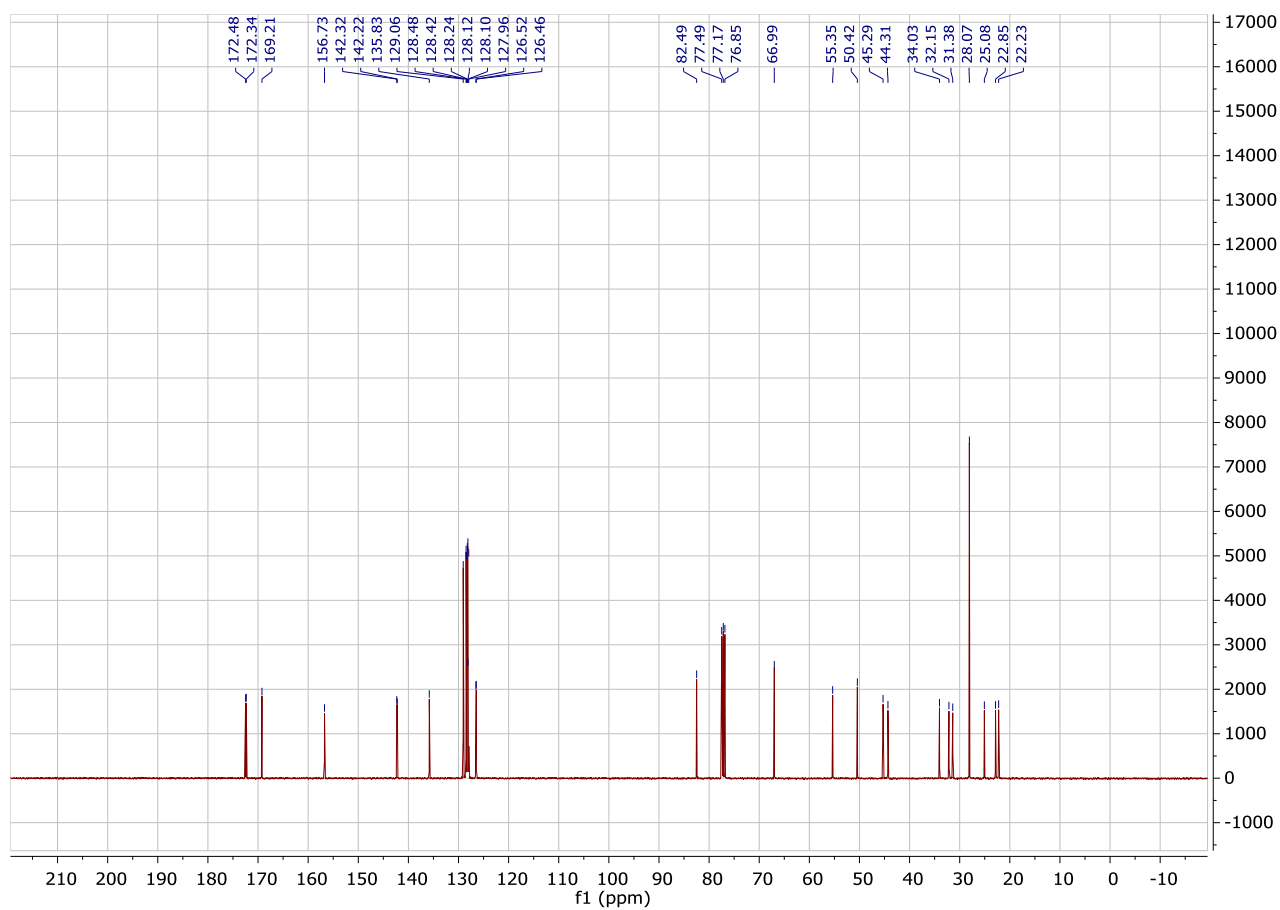

-L.G.S. - Laboratorio Grandi Strumenti - Display Report

Analysis Name av gc78.d  
Sample Name  
Comment 1 mg/ml dil 1:100 MeOH  
Richiedente: Cristina

Acquisition Date 07/25/18 15:35:31  
Method Copy of \_01tmix\_posneg  
Im.MS

Operator  
Instrument

Walter Panzeri  
esquire3000plus

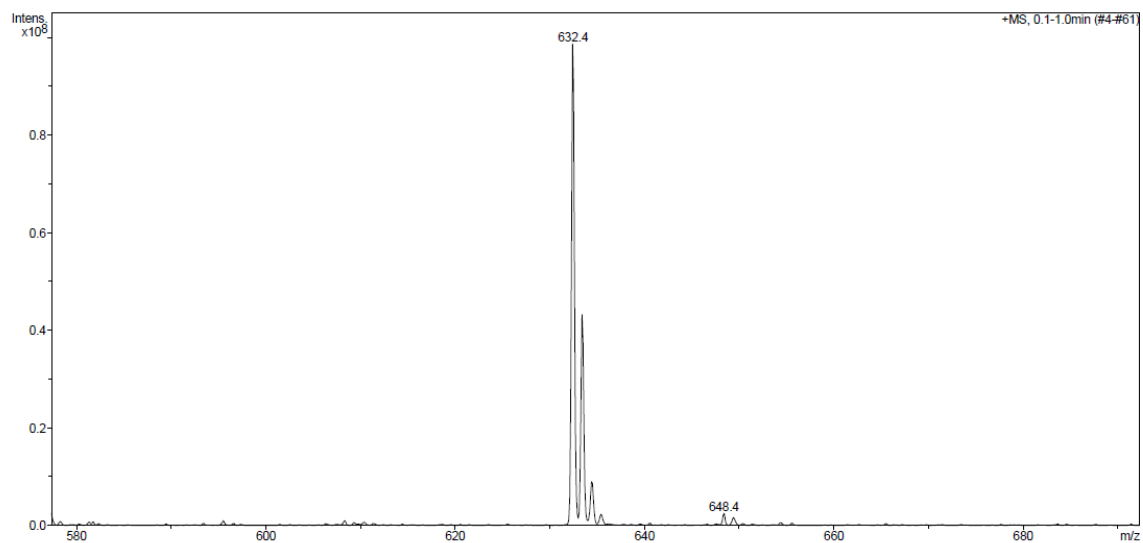

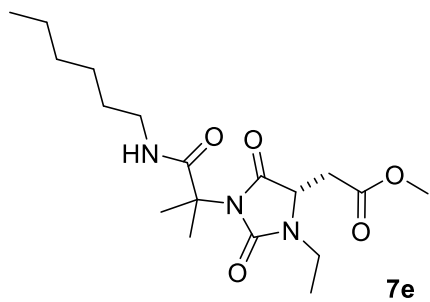

$^1\text{H-NMR}$  (400 MHz,  $\text{CDCl}_3$ )

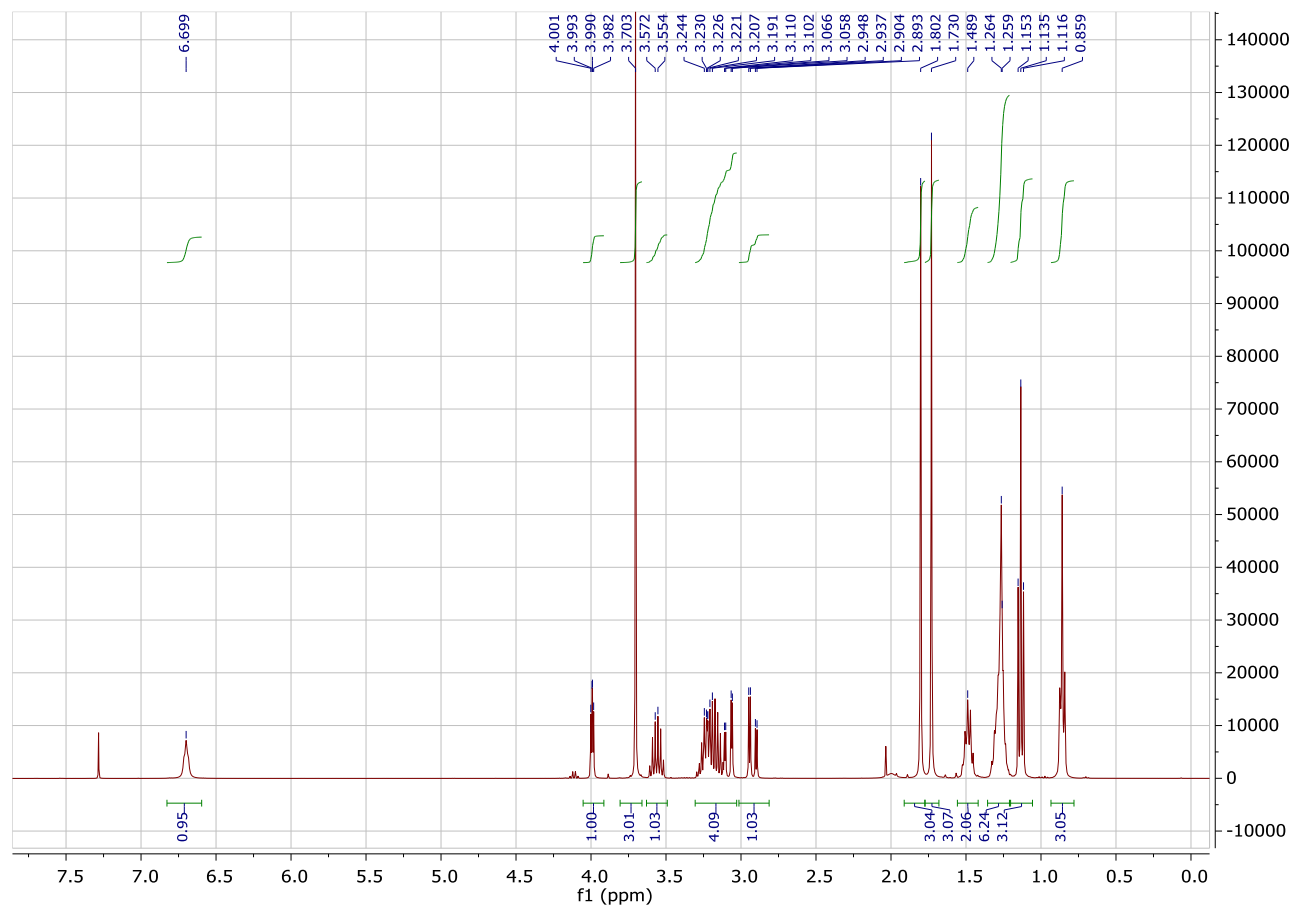

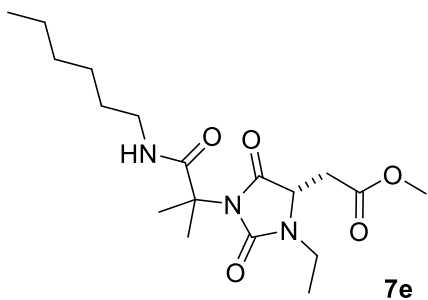

$^{13}\text{C}\{^1\text{H}\}$ -NMR (101 MHz,  $\text{CDCl}_3$ )

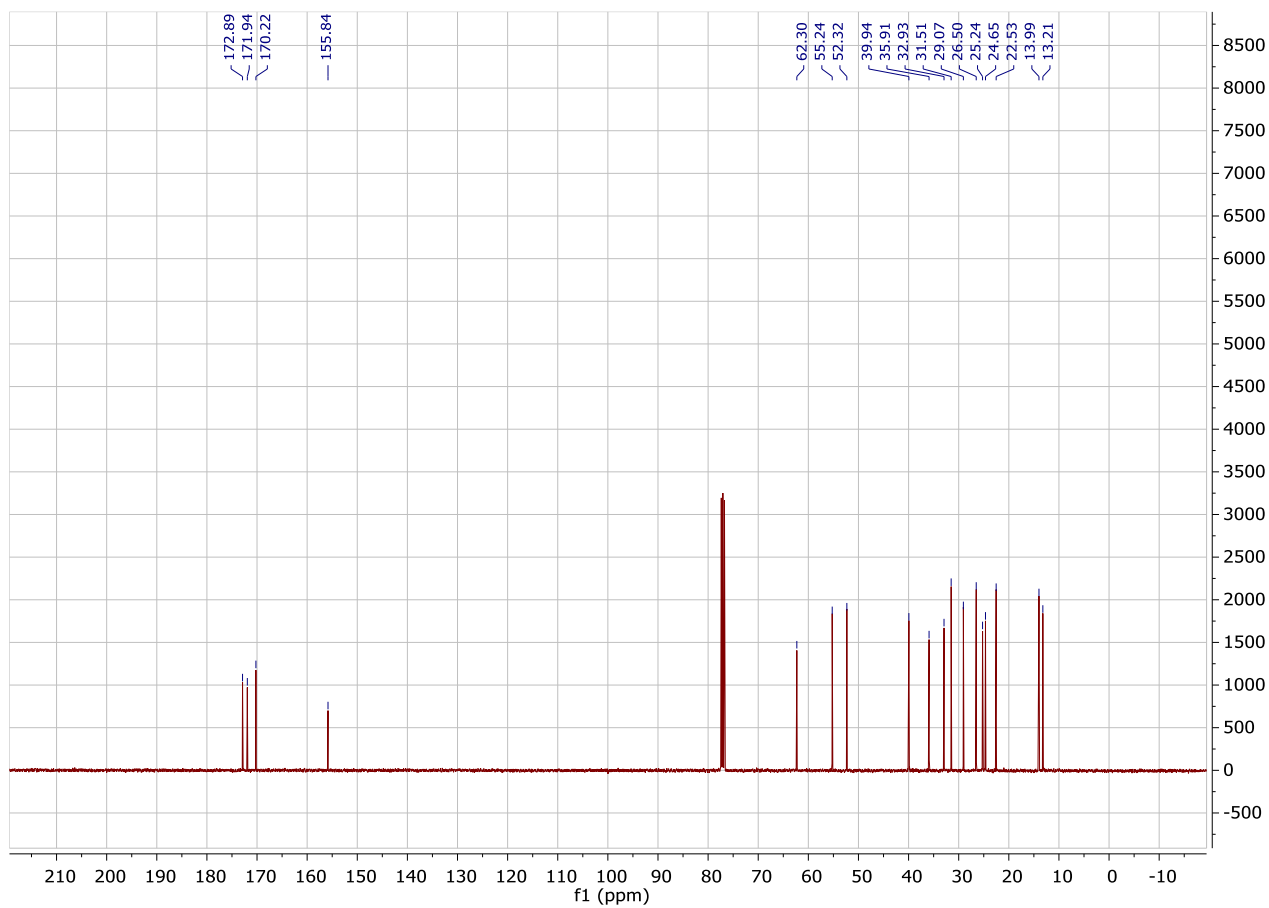



-L.G.S. - Laboratorio Grandi Strumenti - Display Report

Analysis Name av gc20\_c.d  
Sample Name  
Comment 1 mg/ml H2O  
Richiedente: Cristina

Acquisition Date 01/26/18 14:43:10  
Method Copy of \_01tmix\_posneg  
Im.MS

Operator Walter Panzeri  
Instrument esquire3000plus

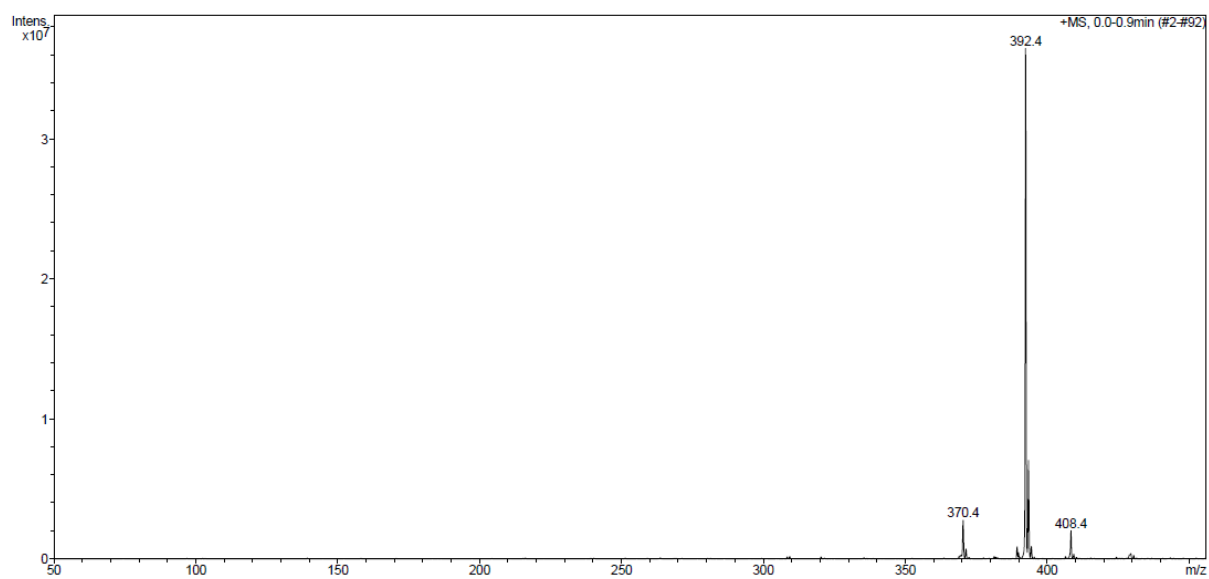

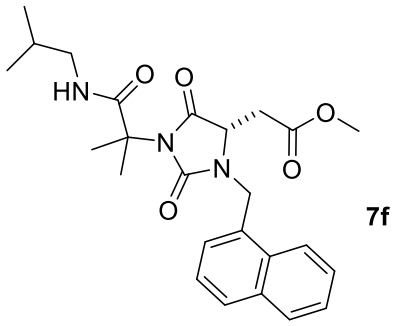

$^1\text{H-NMR}$  (400 MHz,  $\text{CDCl}_3$ )

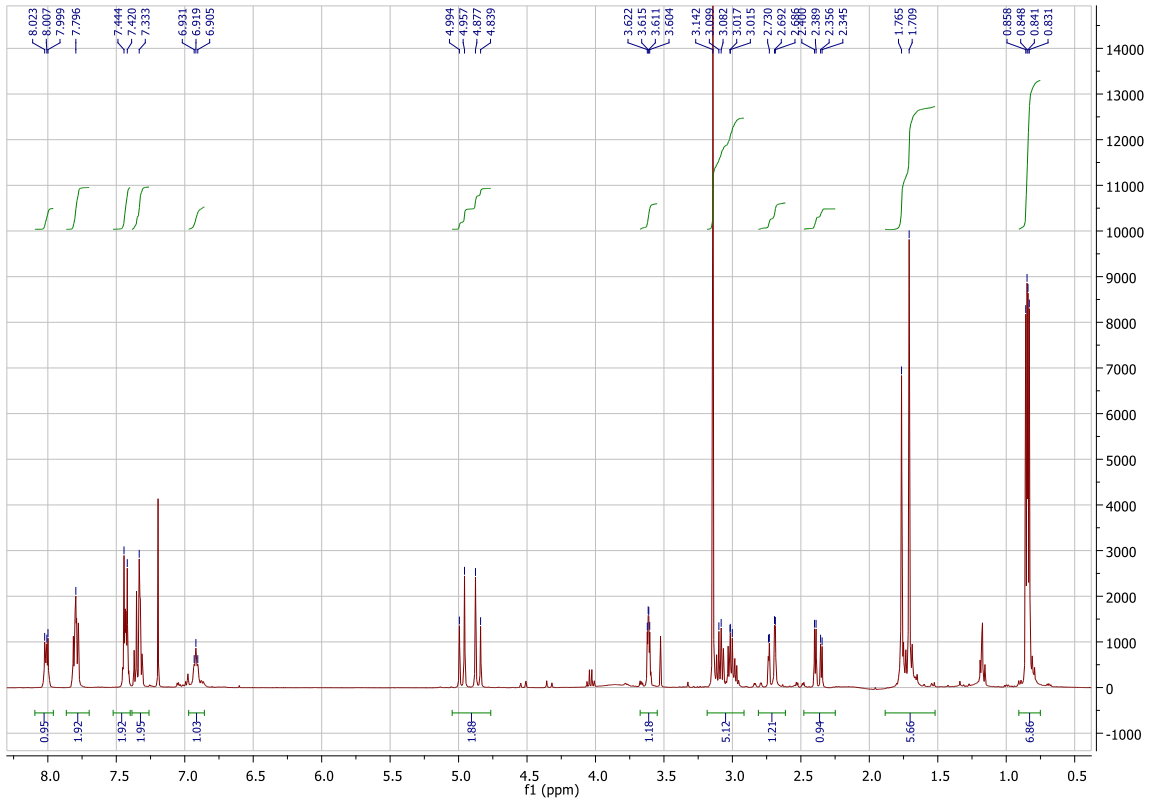

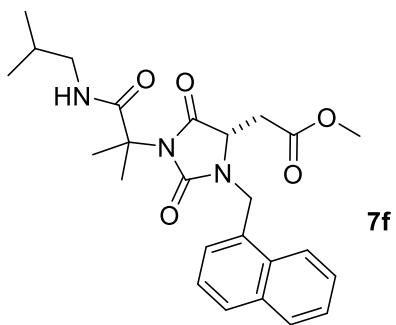

$^{13}\text{C}\{^1\text{H}\}$ -NMR (101 MHz,  $\text{CDCl}_3$ )

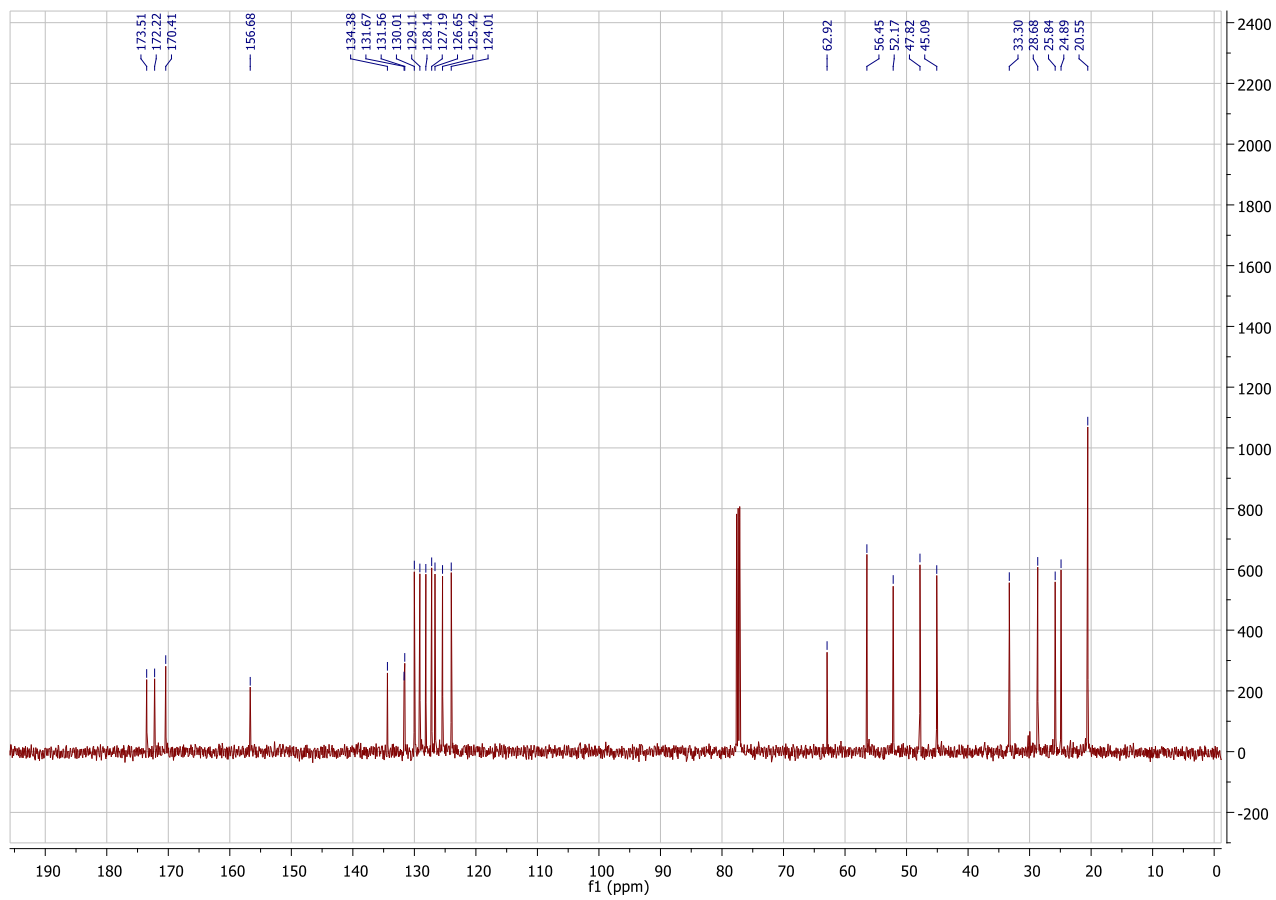

**-L.G.S. - Laboratorio Grandi Strumenti - Display Report**

|               |                                                 |                  |                        |            |                 |
|---------------|-------------------------------------------------|------------------|------------------------|------------|-----------------|
| Analysis Name | av gc50.d                                       | Acquisition Date | 05/22/18 12:26:44      | Operator   | Walter Panzeri  |
| Sample Name   |                                                 | Method           | Copy of _01tmix_posneg | Instrument | esquire3000plus |
| Comment       | 1 mg/ml dil 1:100 MeOH<br>Richiedente: Cristina |                  | Im.MS                  |            |                 |

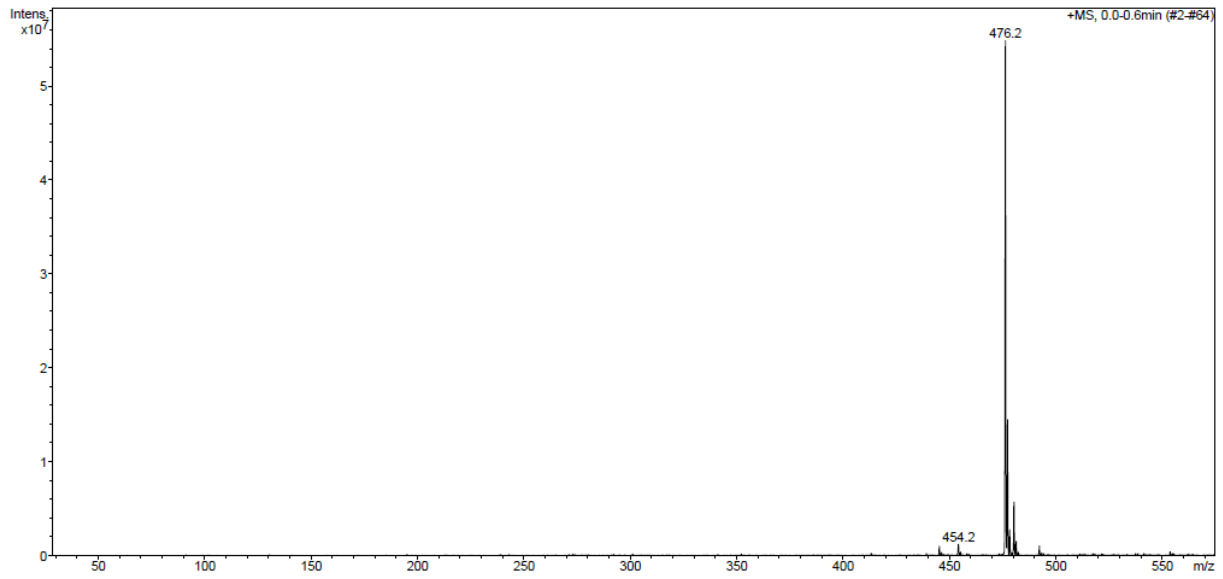

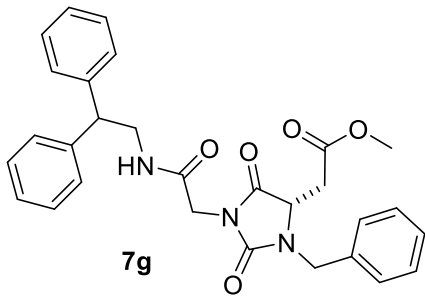

$^1\text{H-NMR}$  (400 MHz,  $\text{CDCl}_3$ )

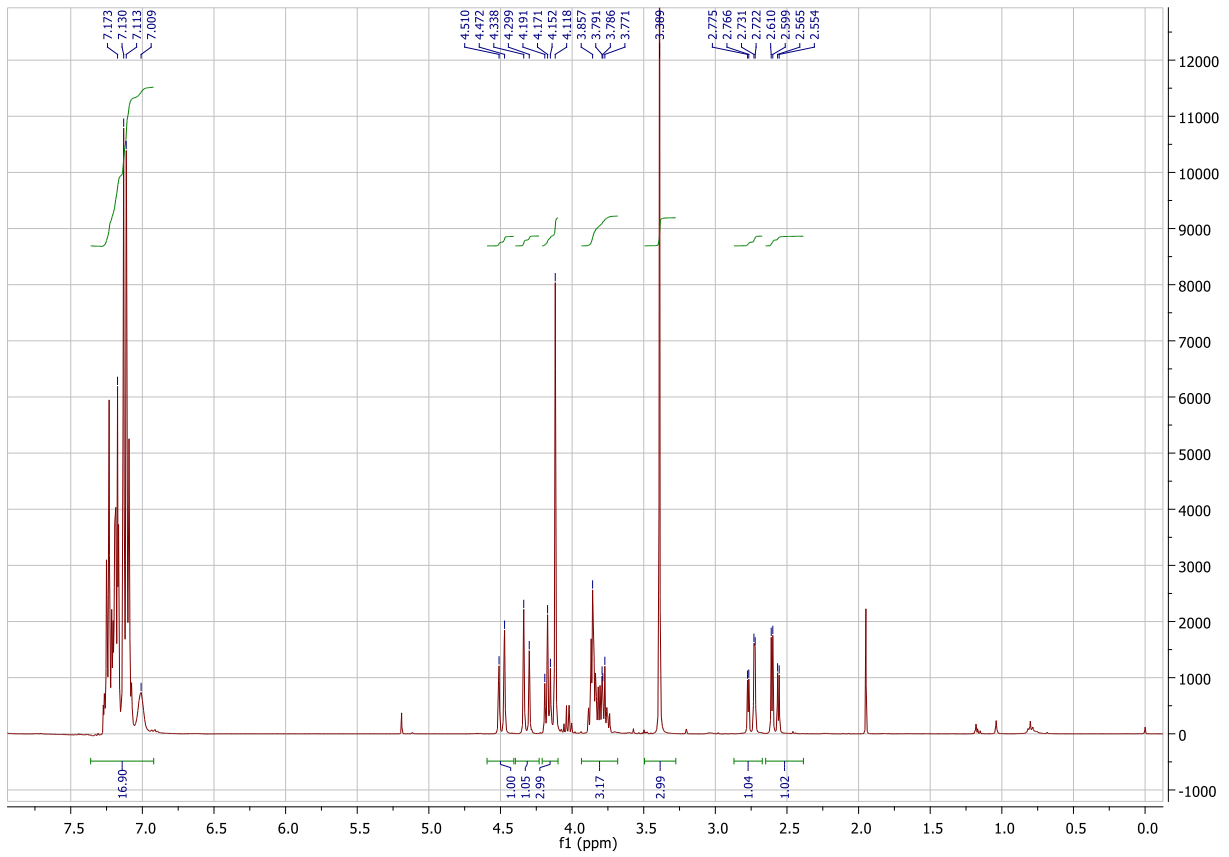

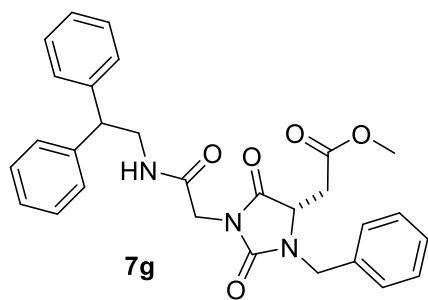

$^{13}\text{C}\{^1\text{H}\}$ -NMR (101 MHz,  $\text{CDCl}_3$ )

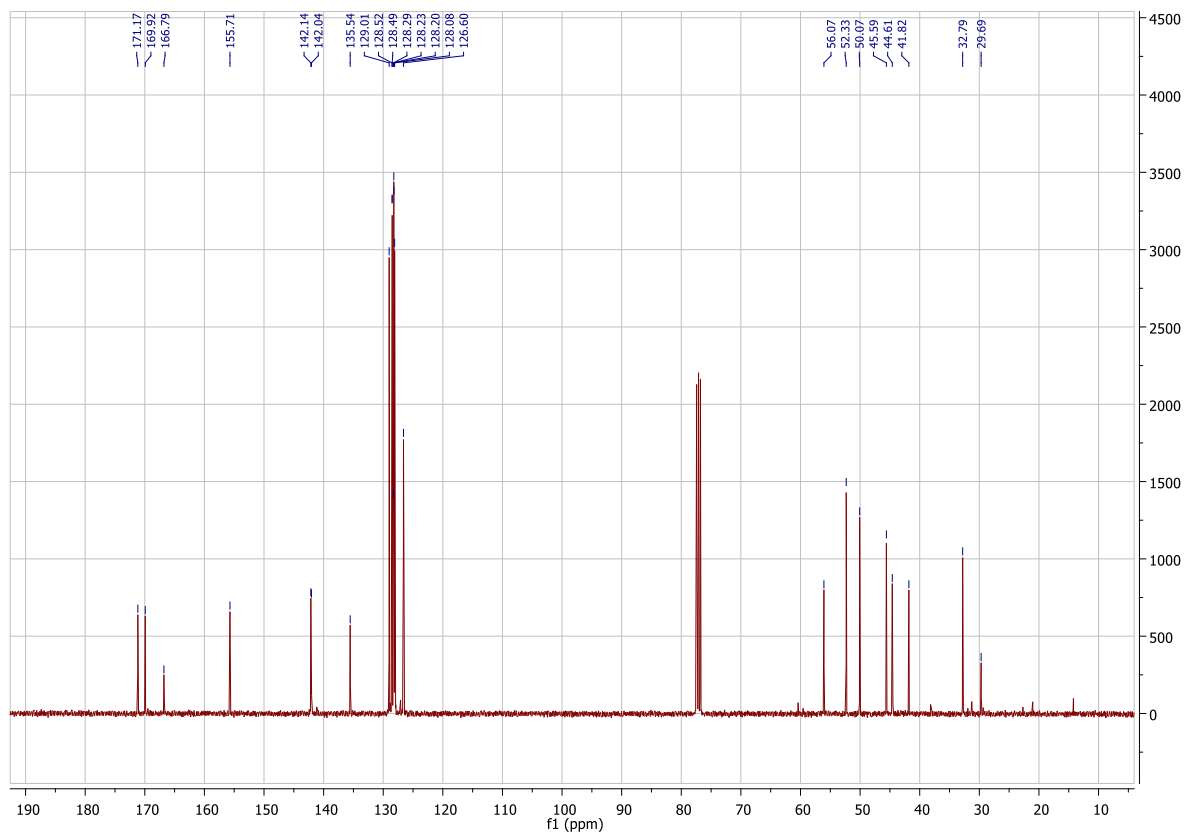

-L.G.S. - Laboratorio Grandi Strumenti - Display Report

|               |                                                 |                  |                                 |            |                 |
|---------------|-------------------------------------------------|------------------|---------------------------------|------------|-----------------|
| Analysis Name | av gc38.d                                       | Acquisition Date | 04/16/18 09:30:16               | Operator   | Walter Panzeri  |
| Sample Name   |                                                 | Method           | Copy of _01tmix_posneg<br>Im.MS | Instrument | esquire3000plus |
| Comment       | 1 mg/ml dil 1:100 MeOH<br>Richiedente: Cristina |                  |                                 |            |                 |

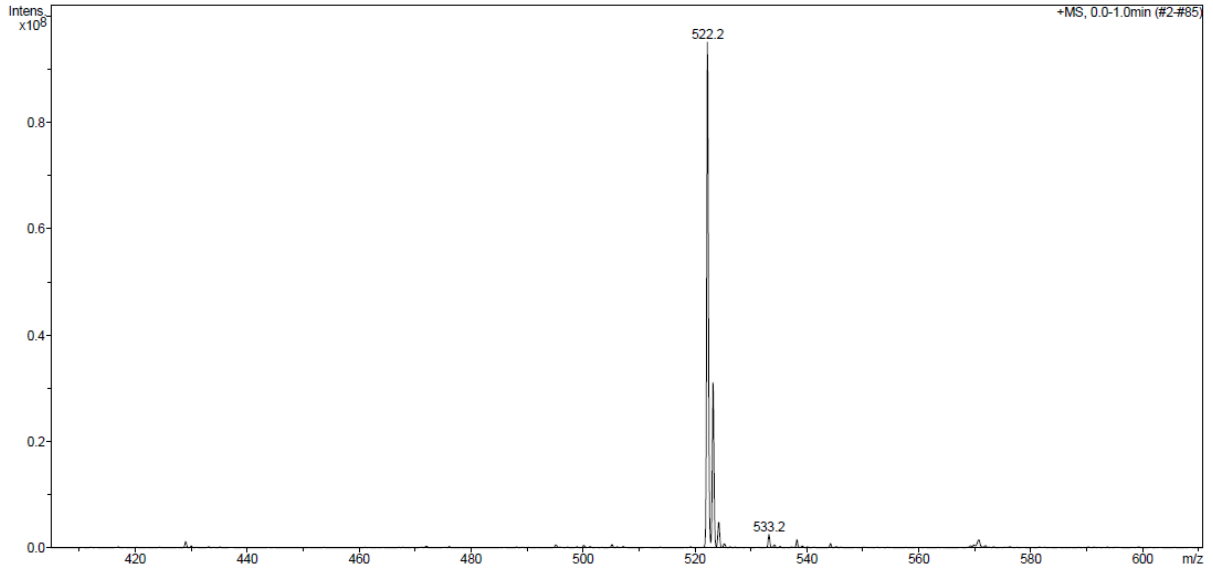

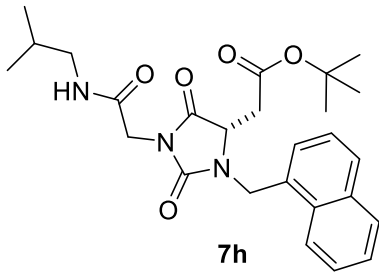

$^1\text{H-NMR}$  (400 MHz,  $\text{CDCl}_3$ )

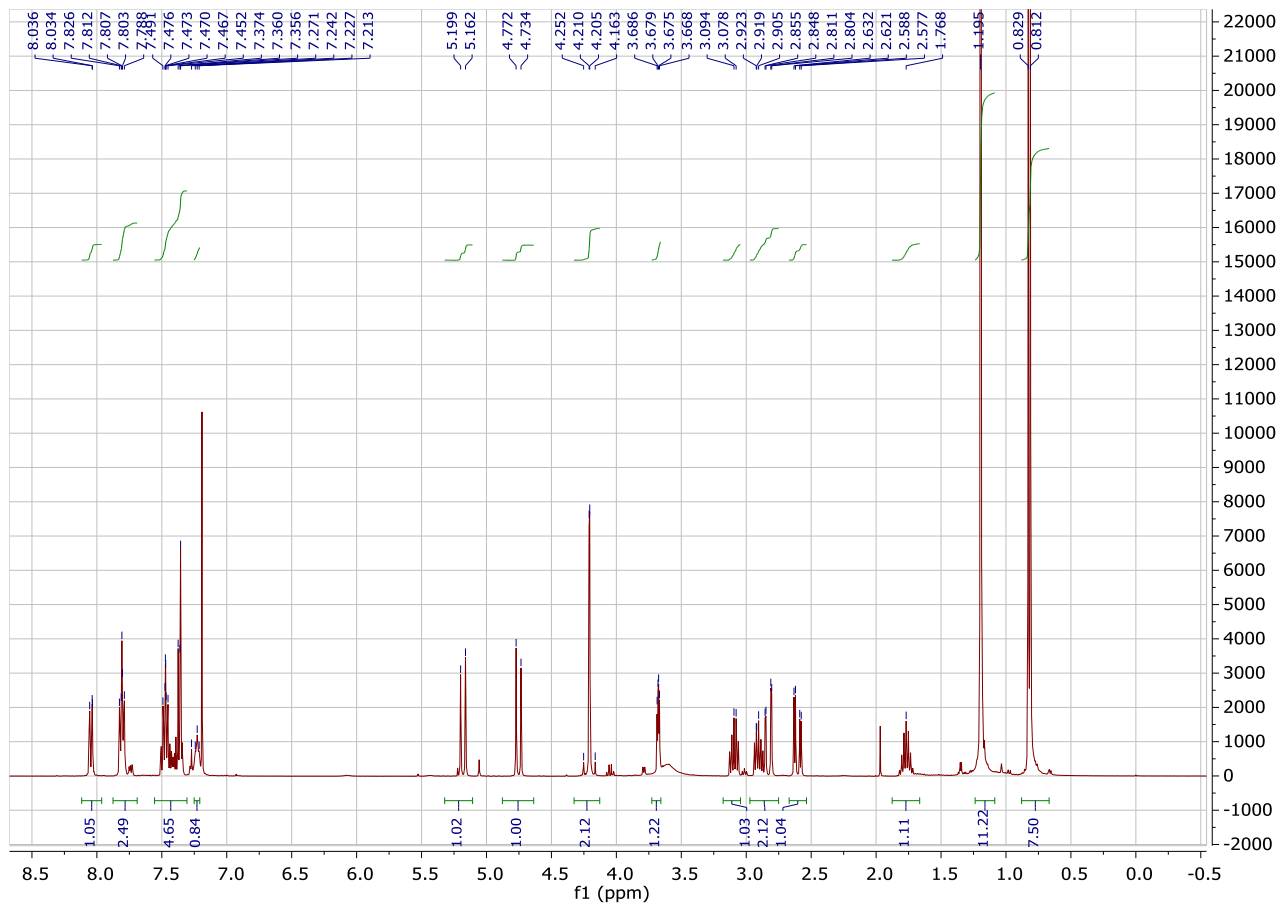





$^{13}\text{C}\{^1\text{H}\}$ -NMR (101 MHz,  $\text{CDCl}_3$ )

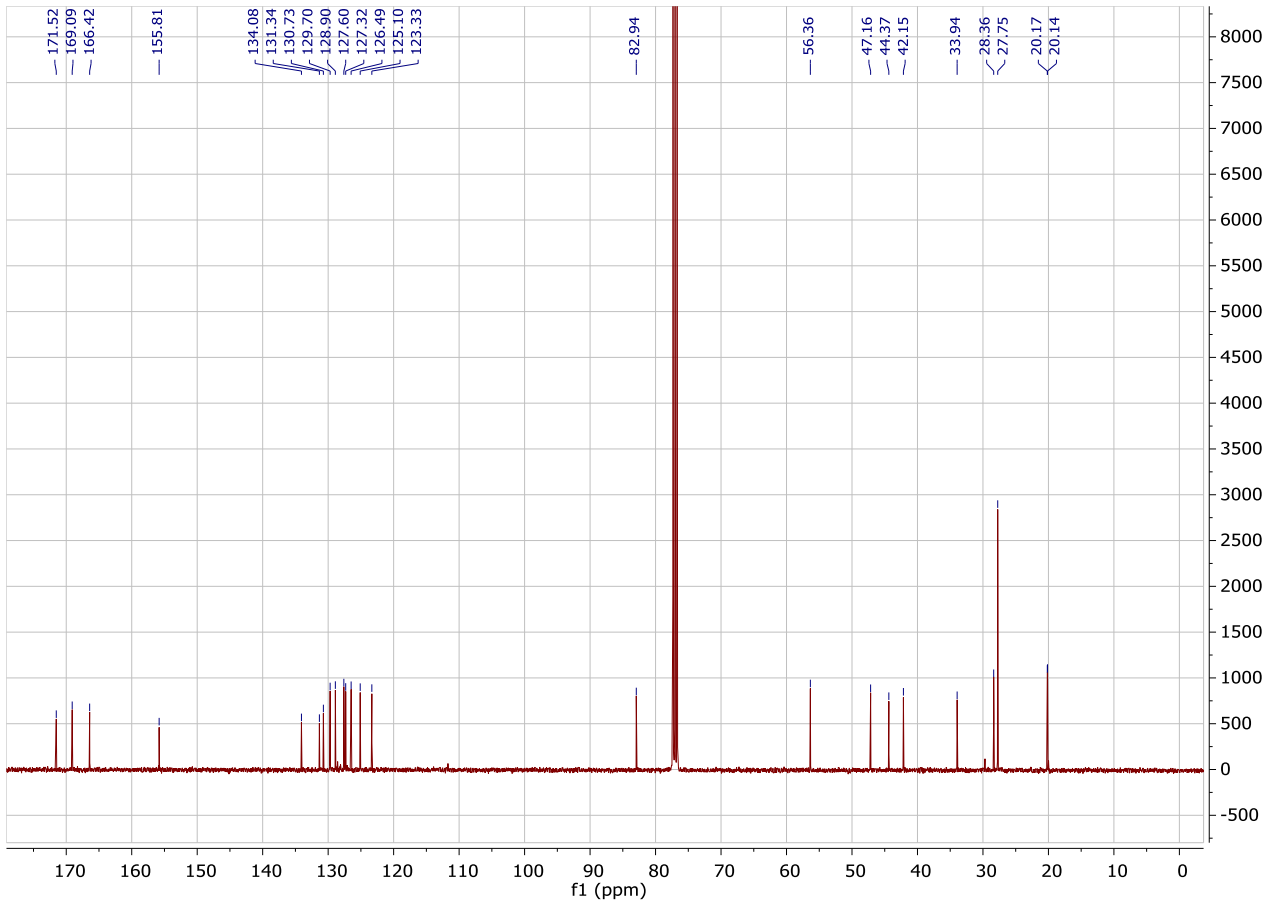

-L.G.S. - Laboratorio Grandi Strumenti - Display Report

Analysis Name av ac069.d  
Sample Name  
Comment 1 mg/ml dil 1:100 MeOH  
Richiedente: Caramiello

Acquisition Date 08/31/20 13:39:32  
Method Copy of SPW\_TBLM.MS

Operator Walter Panzeri  
Instrument esquire3000plus

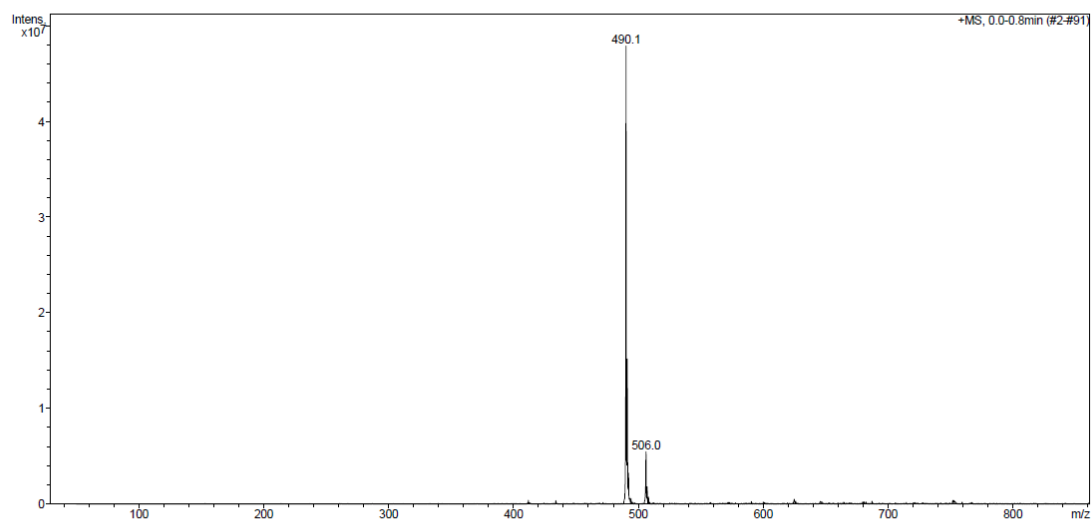

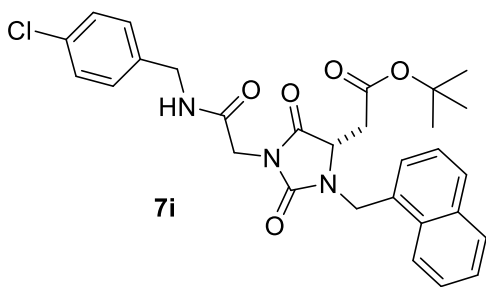

$^1\text{H-NMR}$  (400 MHz,  $\text{CDCl}_3$ )

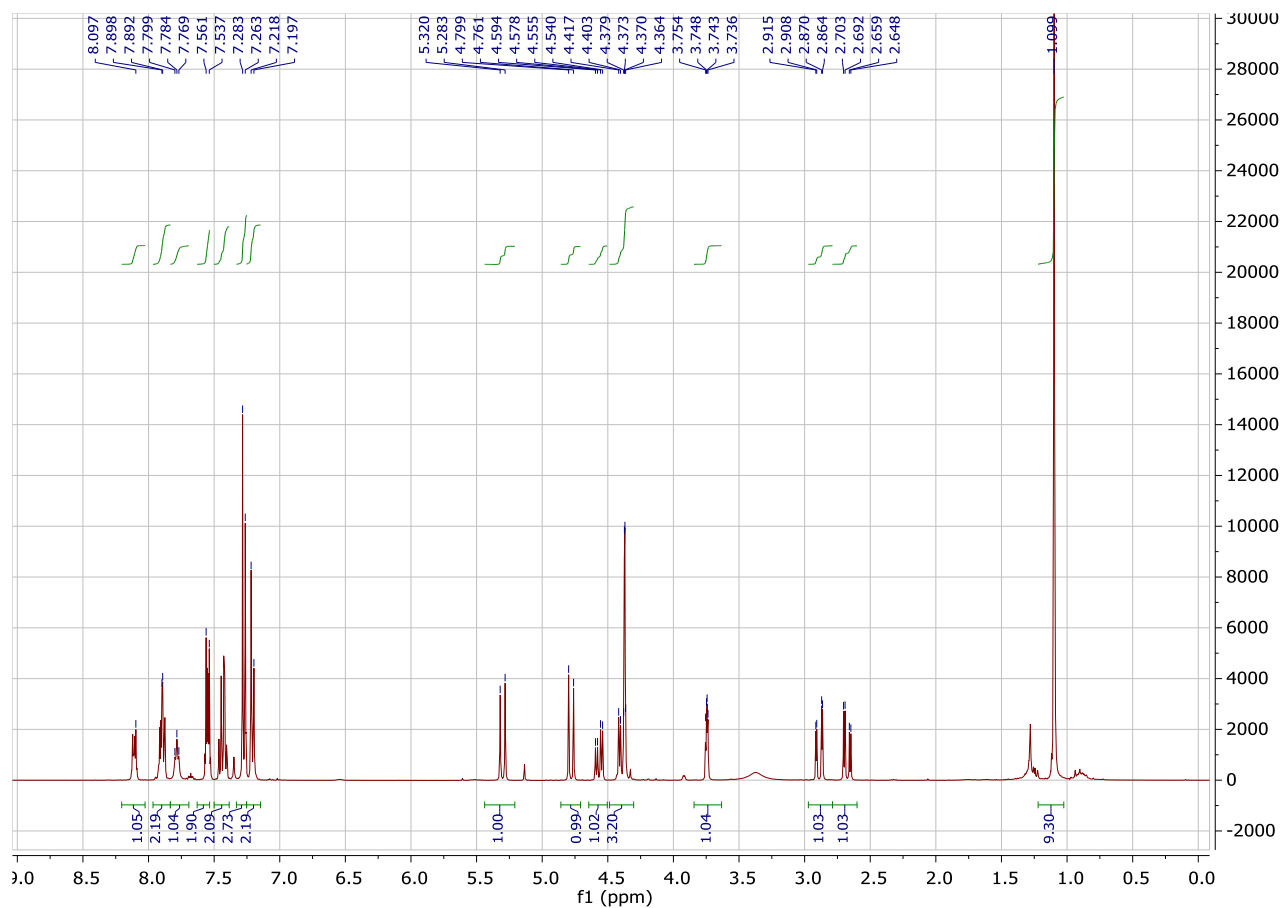

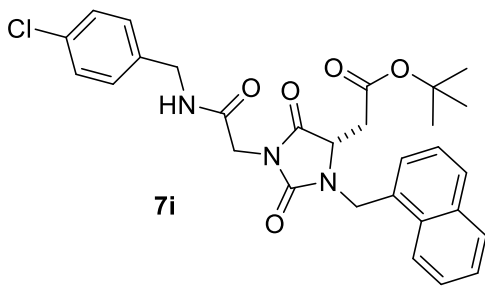

$^{13}\text{C}\{^1\text{H}\}$ -NMR (101 MHz,  $\text{CDCl}_3$ )

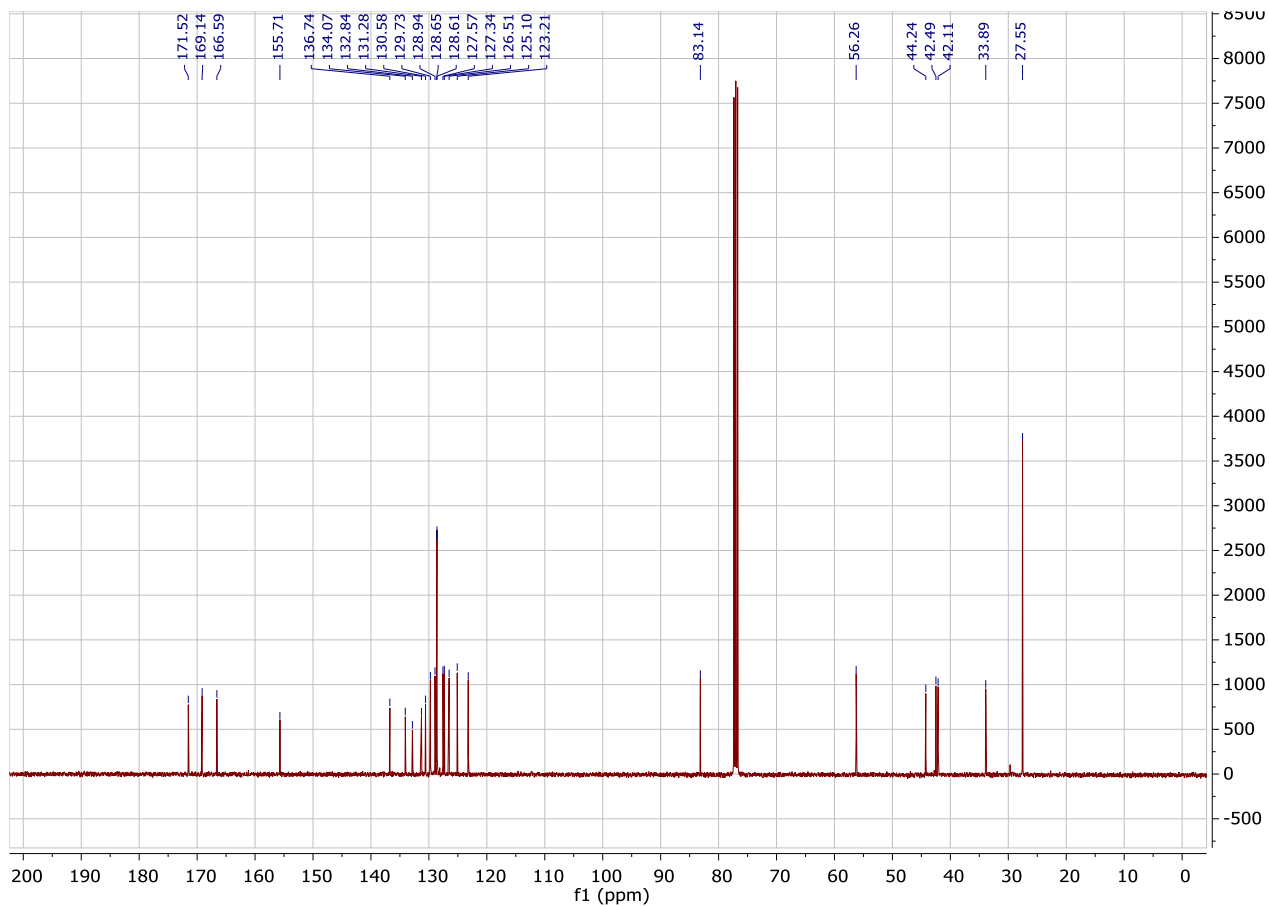

-L.G.S. - Laboratorio Grandi Strumenti - Display Report

Analysis Name av ac194.d  
Sample Name  
Comment 1 mg/ml dil 1:100 MeOH  
Richiedente: Mapanesi Alessia

Acquisition Date 03/18/22 11:28:34  
Method Copy of \$opt0622.MS

Operator Walter Panzeri  
Instrument esquire3000plus

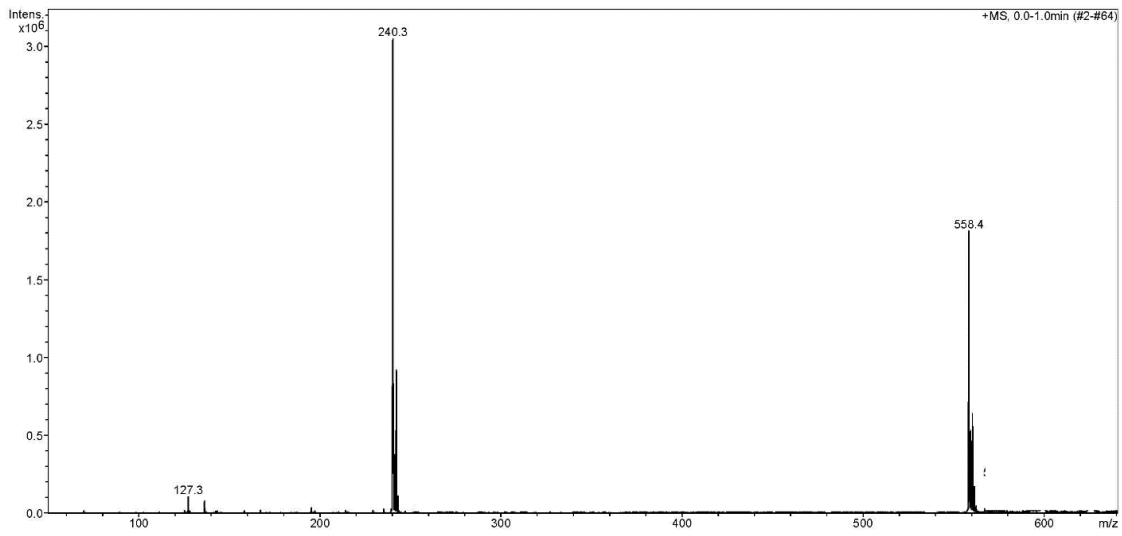

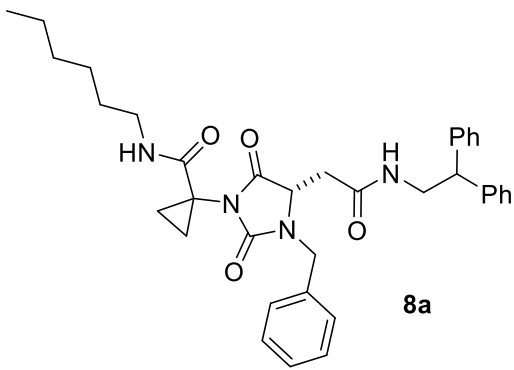

$^1\text{H-NMR}$  (400 MHz,  $\text{CDCl}_3$ )

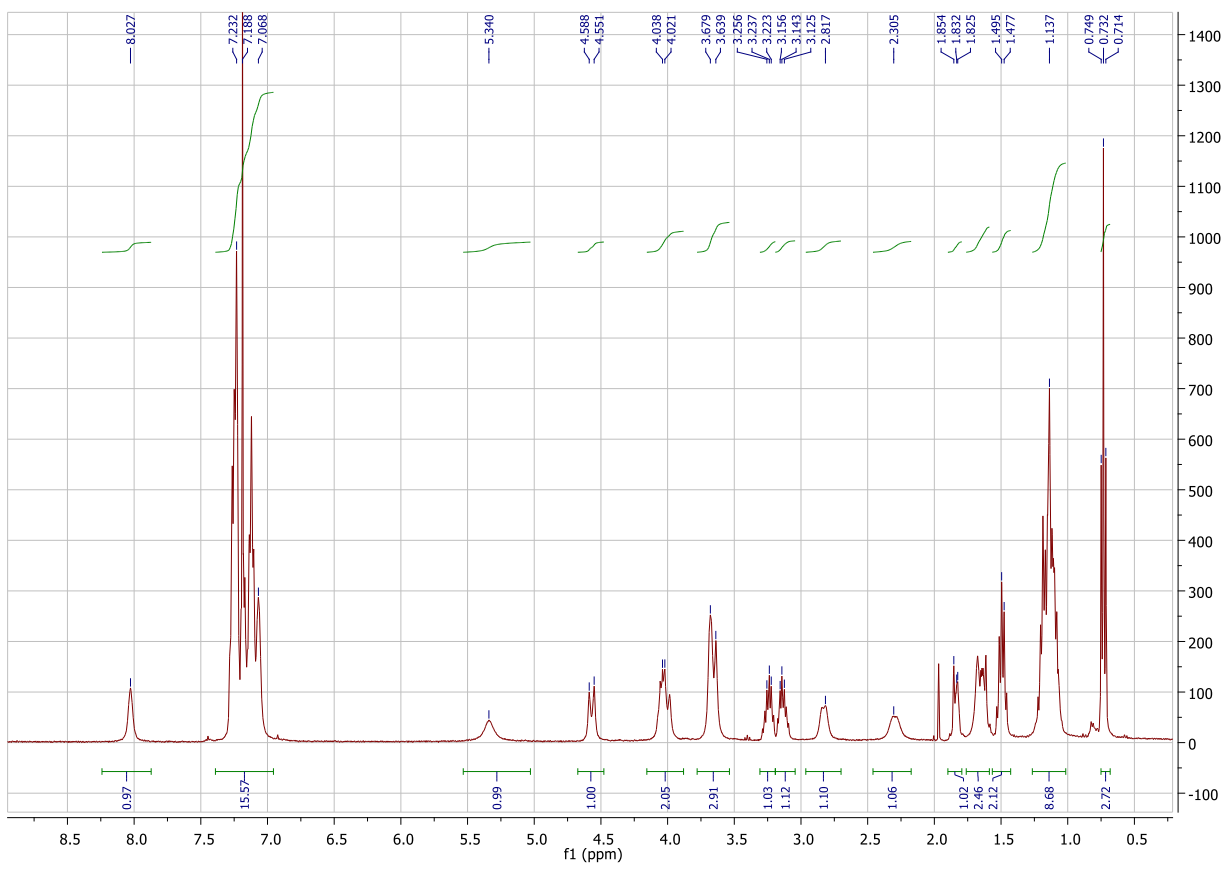

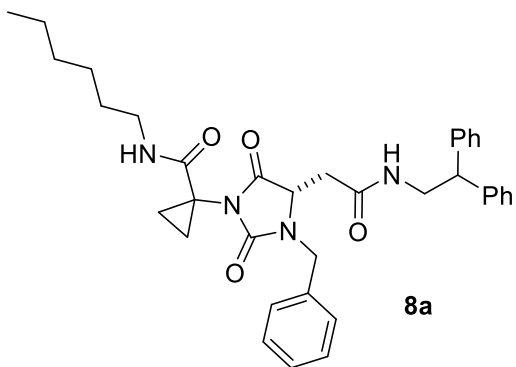

$^{13}\text{C}\{^1\text{H}\}$ -NMR (101 MHz,  $\text{CDCl}_3$ )

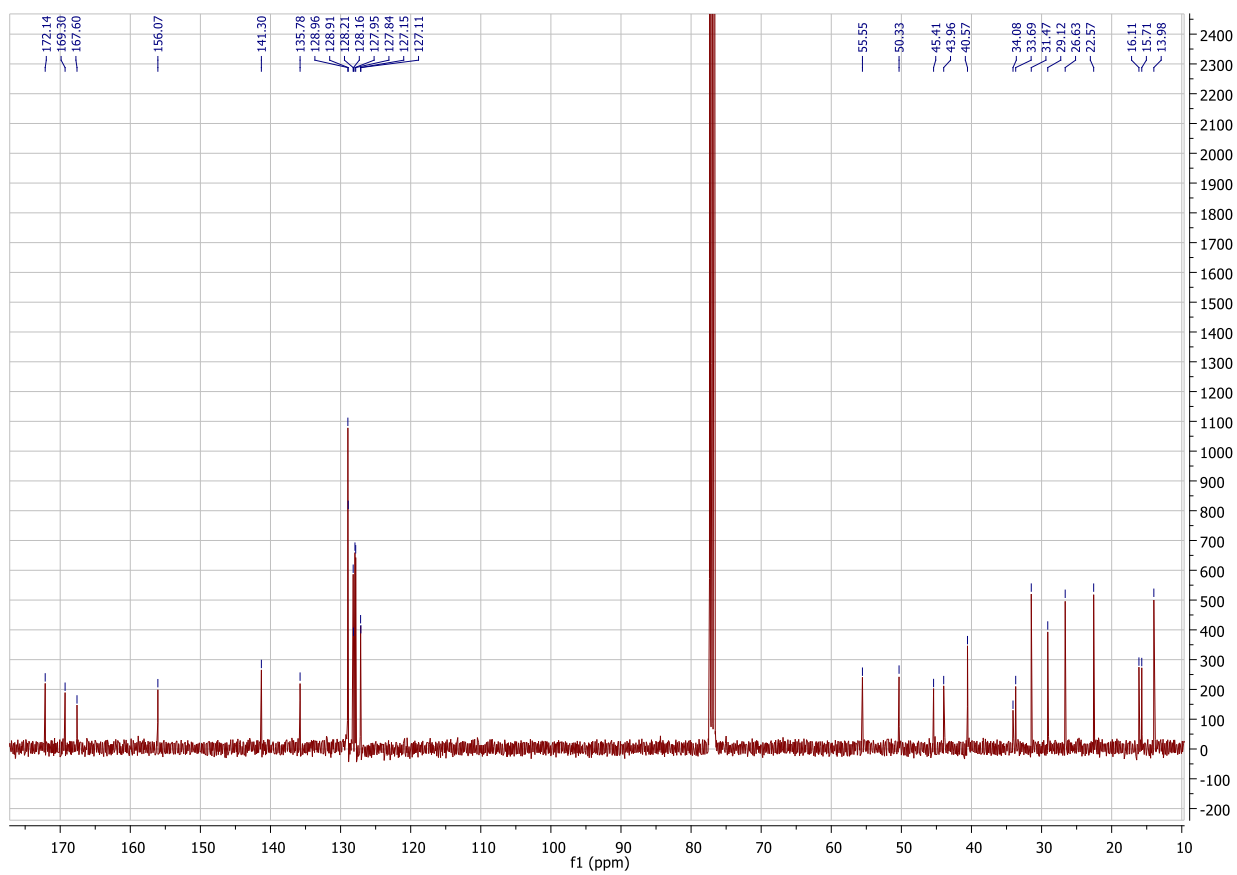

-L.G.S. - Laboratorio Grandi Strumenti - Display Report

Analysis Name av fm2856.d  
Sample Name  
Comment 1 mg/ml dil 1:100 MeOH  
Richiedente: Frigeno

Acquisition Date 07/13/17 13:23:26  
Method Copy of \_01tmix\_posneg  
Im.MS

Operator Walter Panzeri  
Instrument esquire3000plus

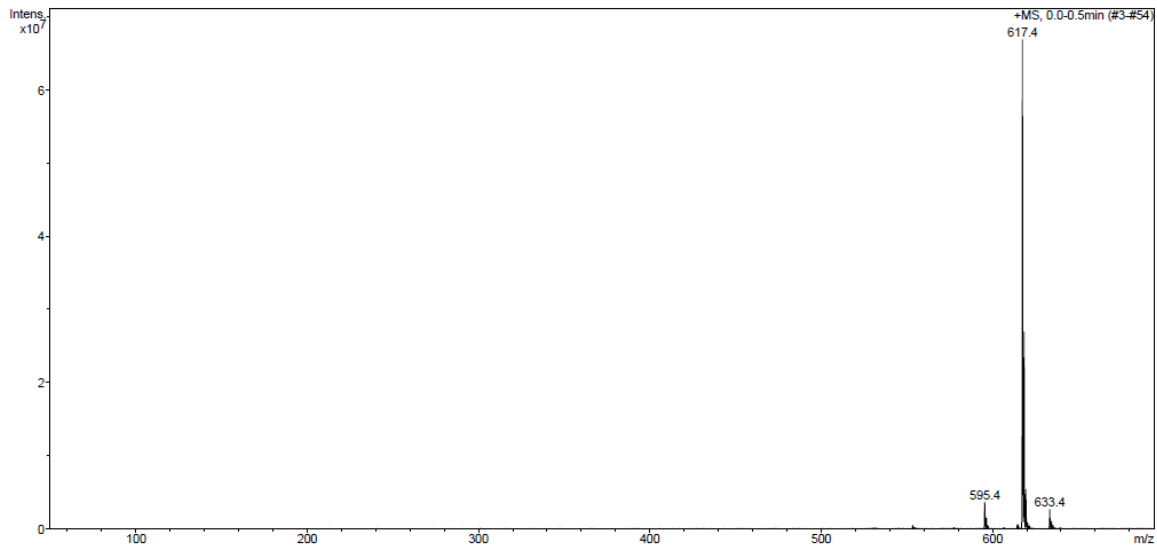



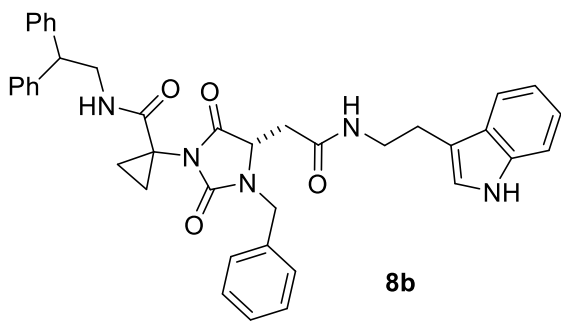

$^1\text{H-NMR}$  (101 MHz,  $\text{dms}\text{-d}_6$ )

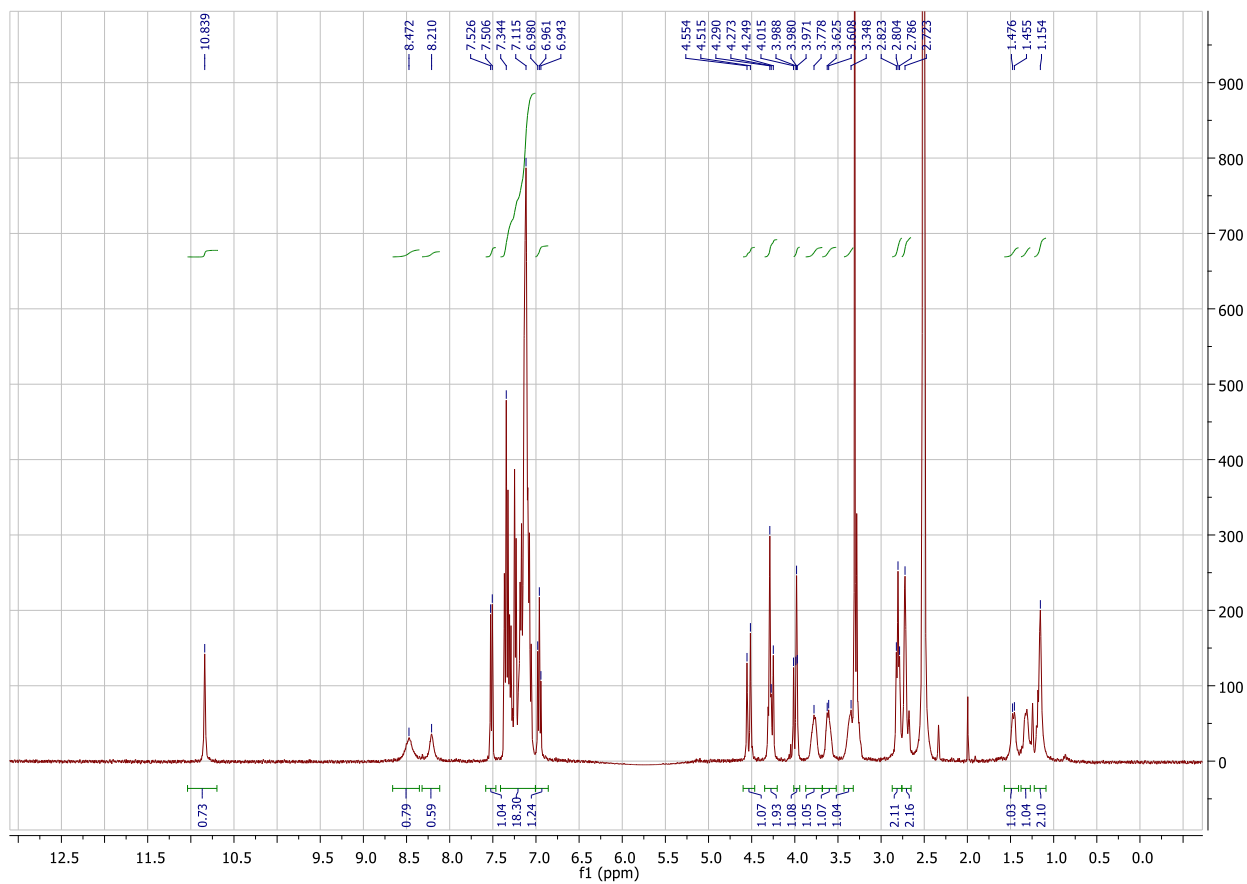

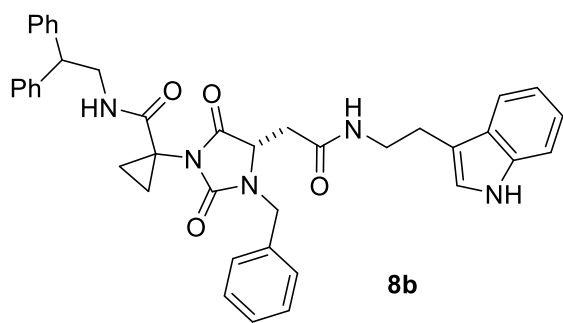

$^{13}\text{C}\{^1\text{H}\}$ -NMR (101 MHz,  $\text{CDCl}_3$ )

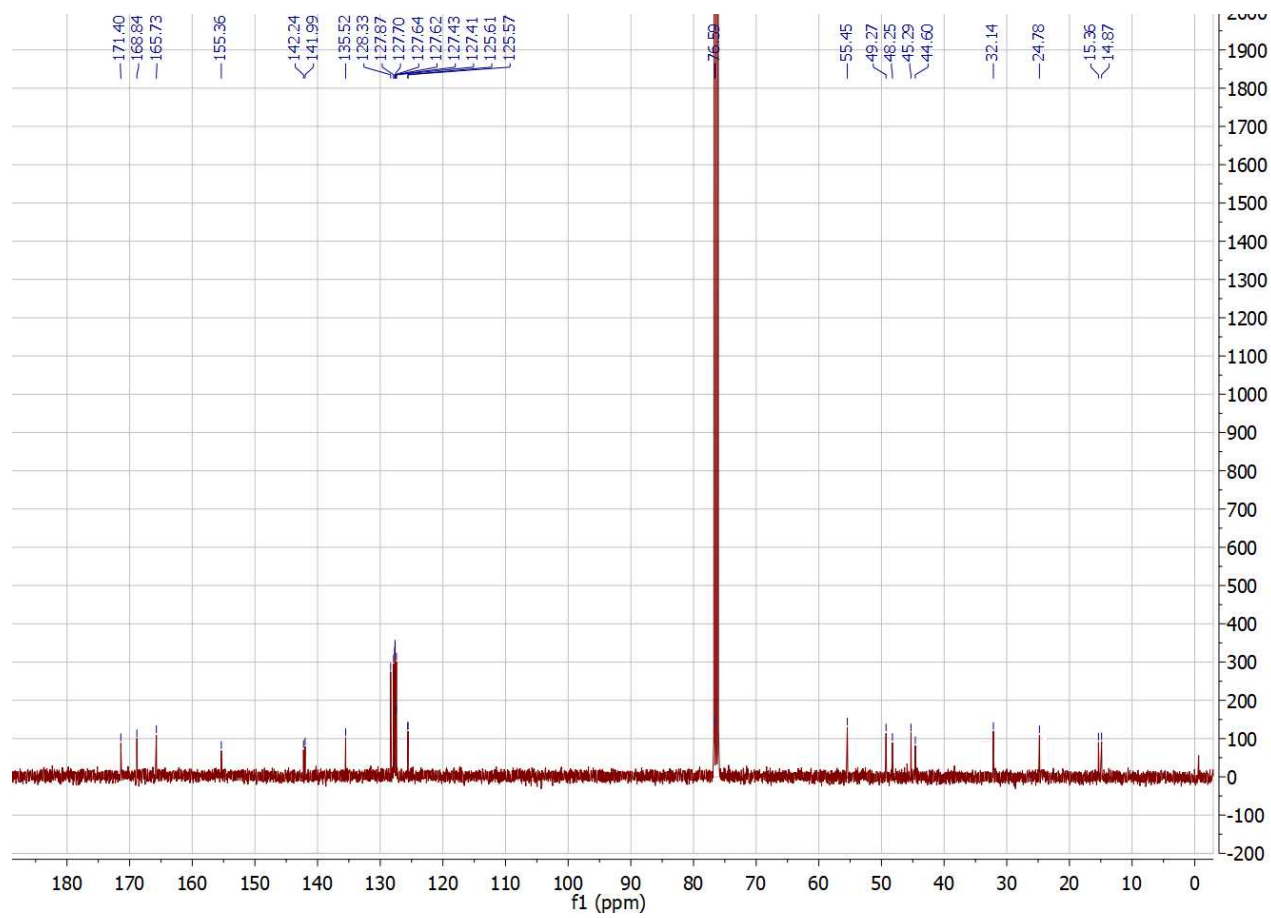

-L.G.S. - Laboratorio Grandi Strumenti - Display Report

Analysis Name av gc111.d  
Sample Name  
Comment 1 mg/ml dil 1:100 MeOH  
Richiedente: Cristina

Acquisition Date 02/08/19 14:15:22  
Method Copy of \_01tmix\_posneg  
Im.MS

Operator Walter Panzeri  
Instrument esquire3000plus

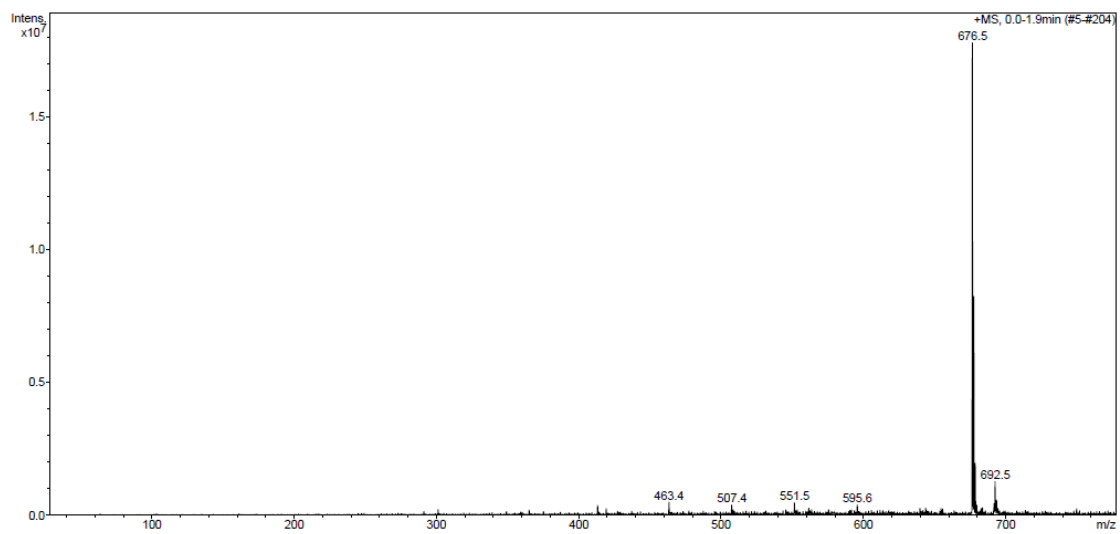

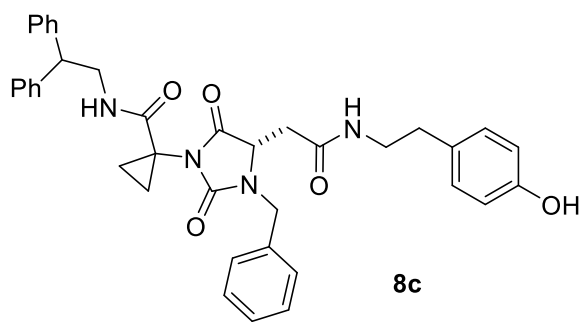

$^1\text{H-NMR}$  (400 MHz,  $\text{dms}\text{-d}_6$ )

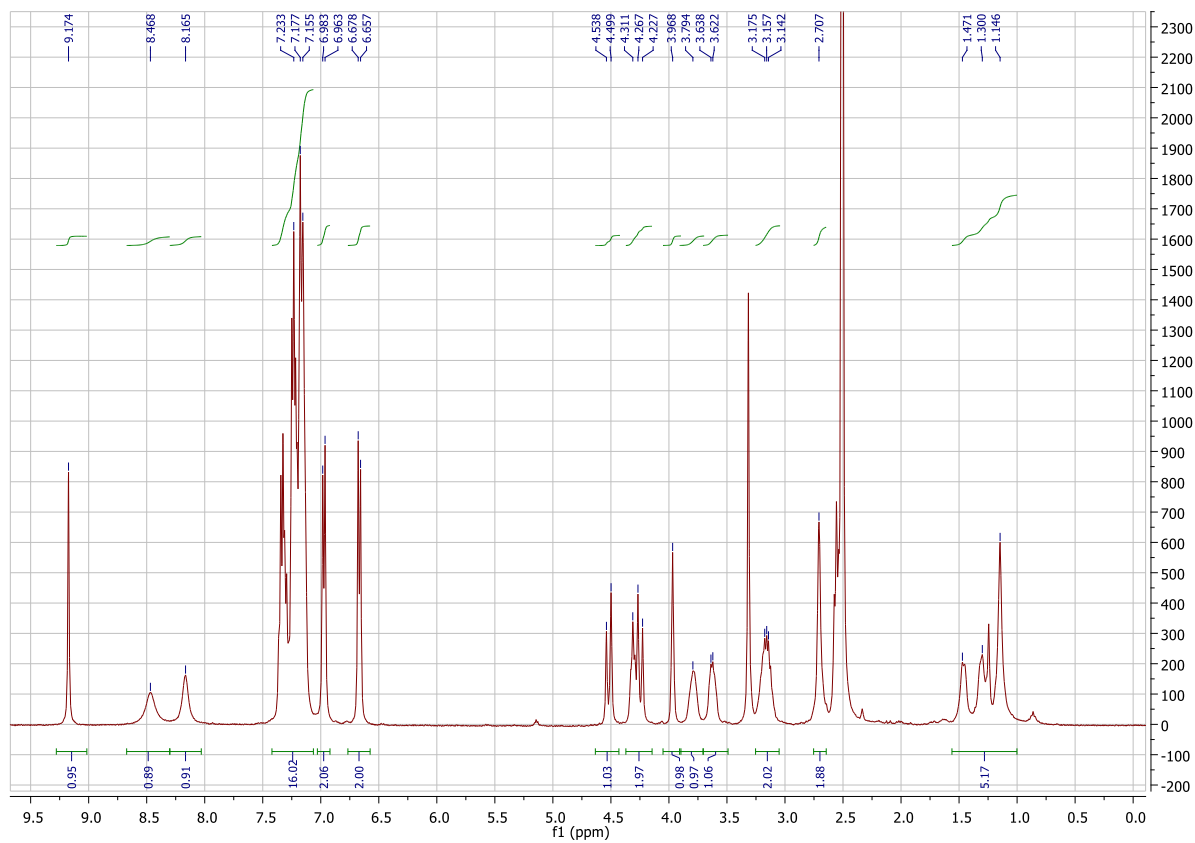



$^{13}\text{C}\{^1\text{H}\}$ -NMR (101 MHz,  $\text{dms}\text{-d}_6$ )

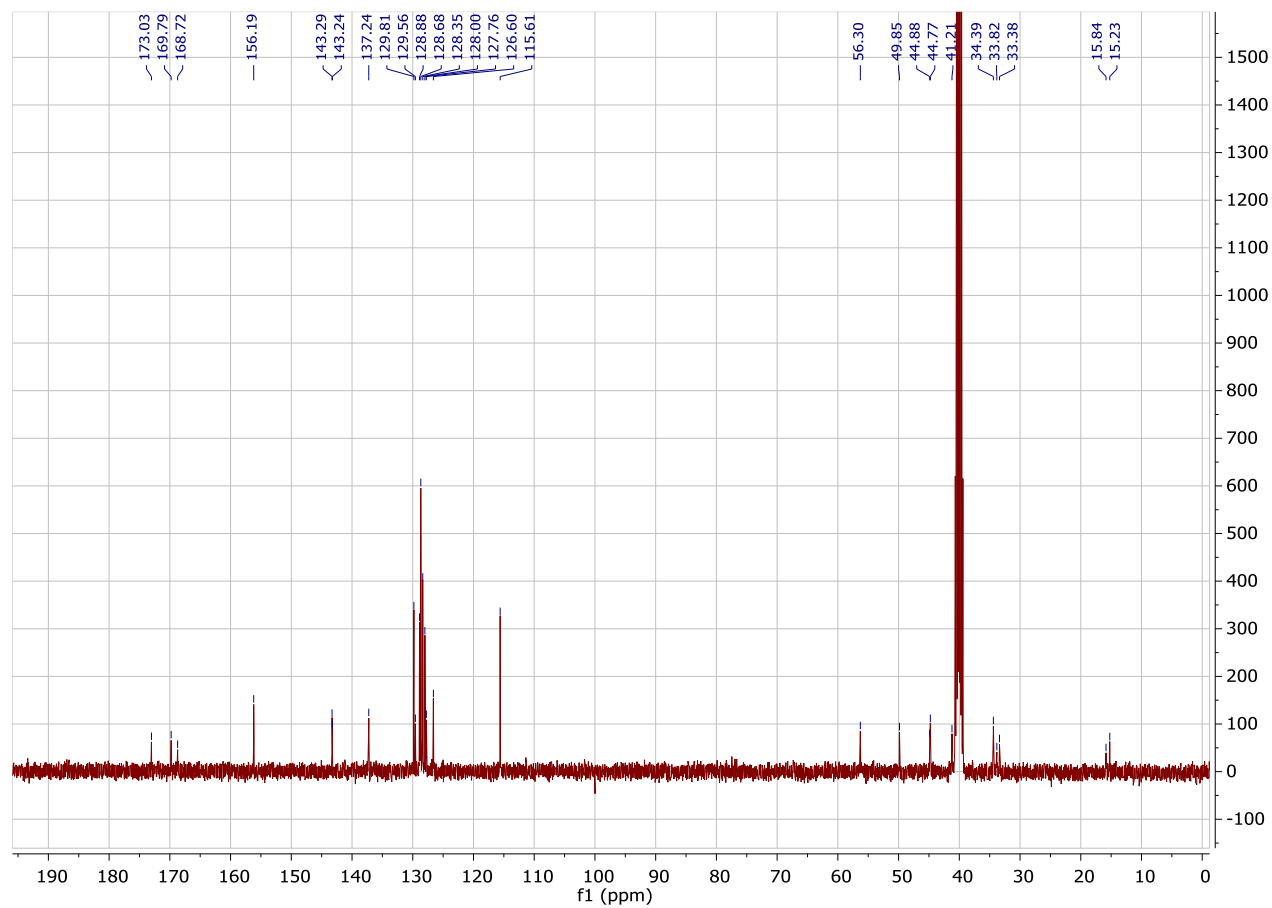

**-L.G.S. - Laboratorio Grandi Strumenti - Display Report**

Analysis Name    av ac 172.d  
Sample Name  
Comment        1 mg/ml dil 1:100 MeOH  
                  Richiedente: Caramiello

Acquisition Date 11/10/21 10:44:30  
Method            Copy of \$opt0622.MS

Operator  
Instrument

Walter Panzeri  
esquire3000plus

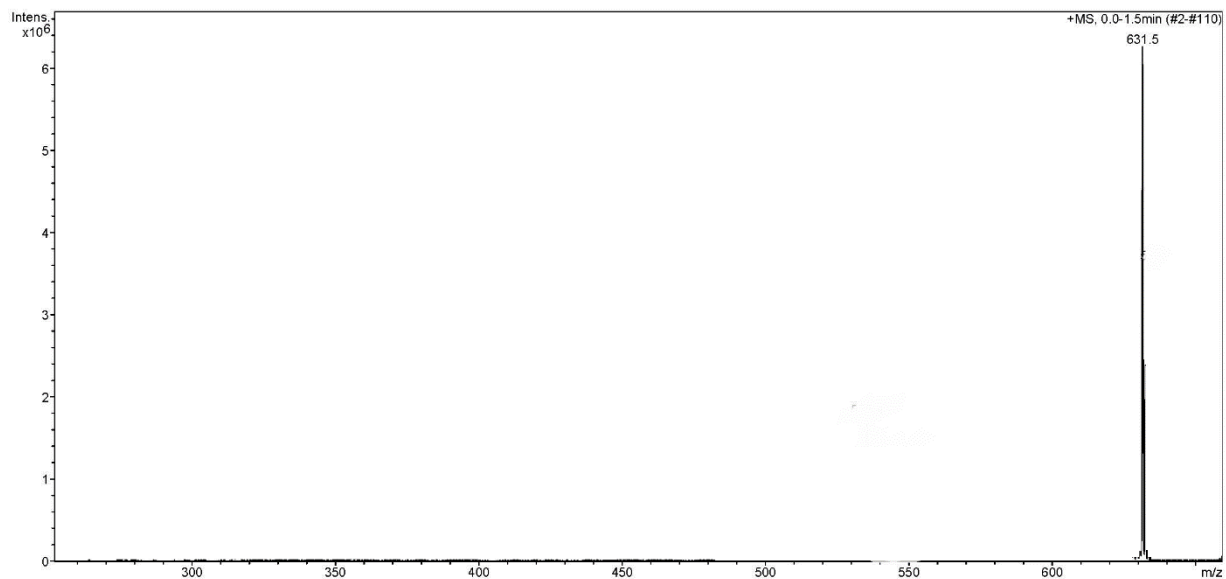

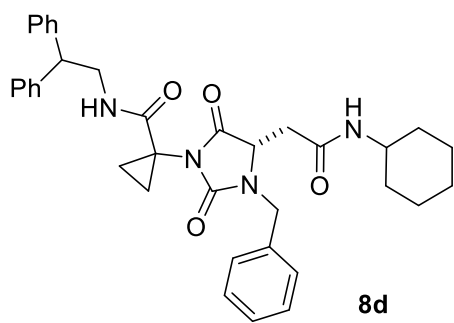

<sup>1</sup>H-NMR (400 MHz, CDCl<sub>3</sub>)

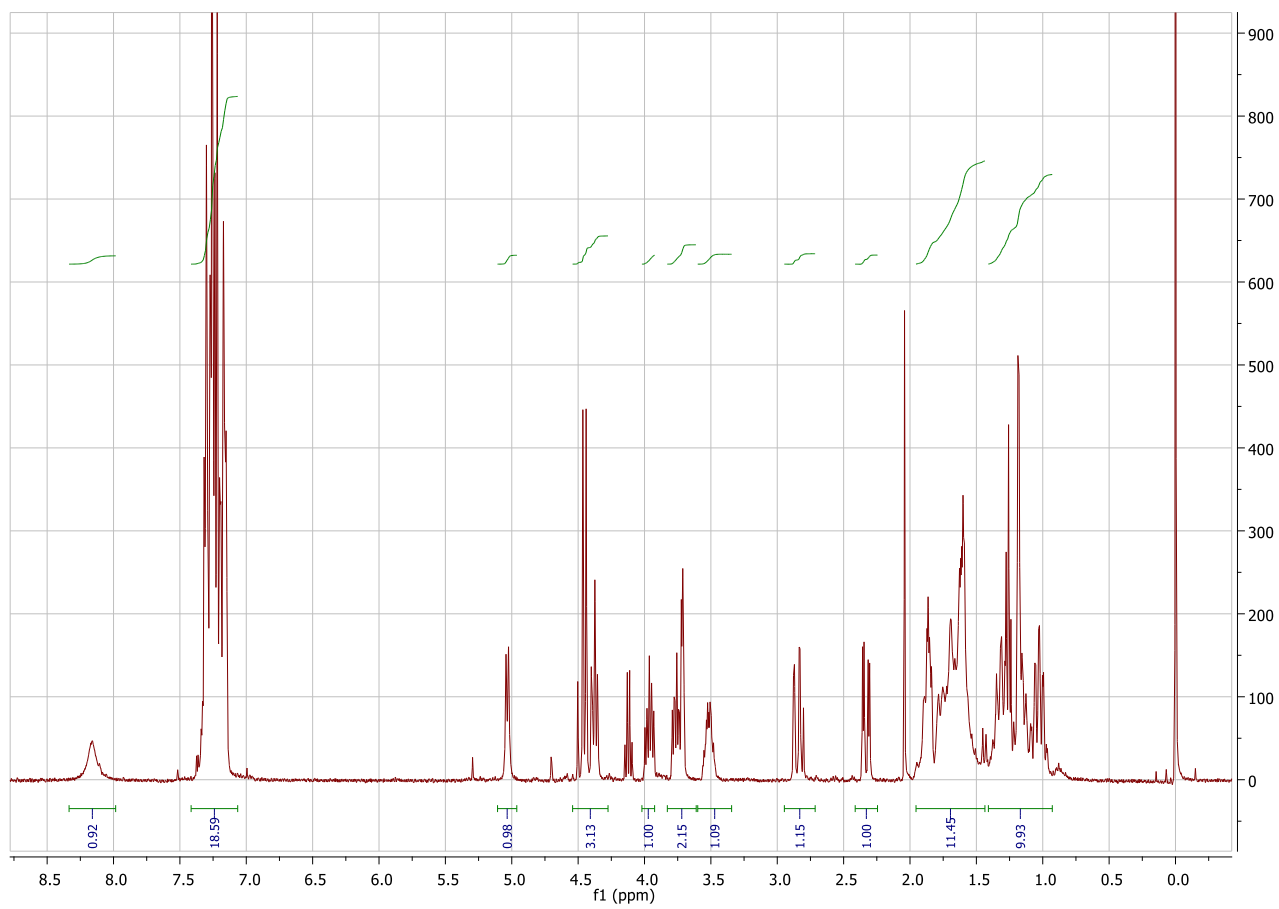



$^{13}\text{C}\{^1\text{H}\}$ -NMR (101 MHz,  $\text{CDCl}_3$ )

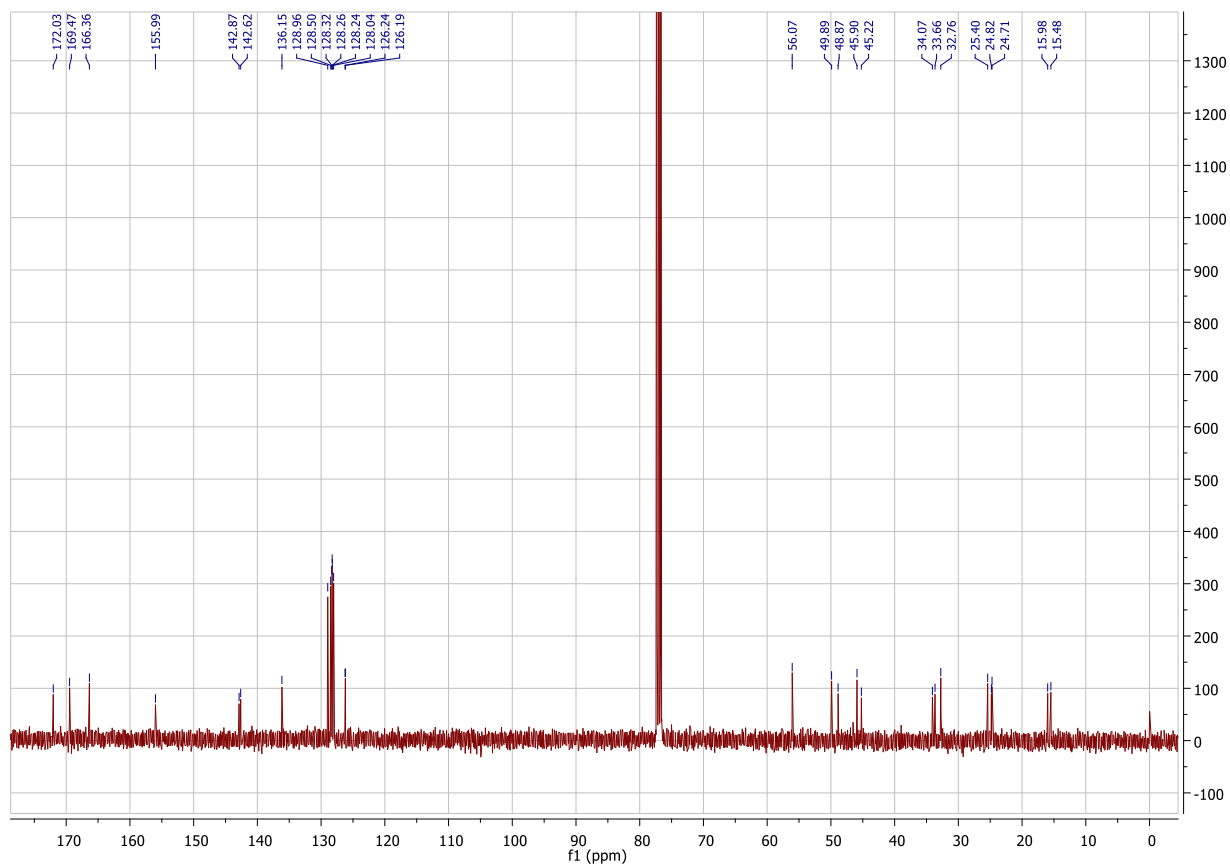



-L.G.S. - Laboratorio Grandi Strumenti - Display Report

Analysis Name av fv2063.d  
Sample Name  
Comment 1 mg/ml dil 1:100 MeOH  
Richiedente: Viani

Acquisition Date 02/04/19 14:42:37  
Method Copy of \_01tmix\_posneg  
Int.MS

Operator Walter Panzeri  
Instrument esquire3000plus

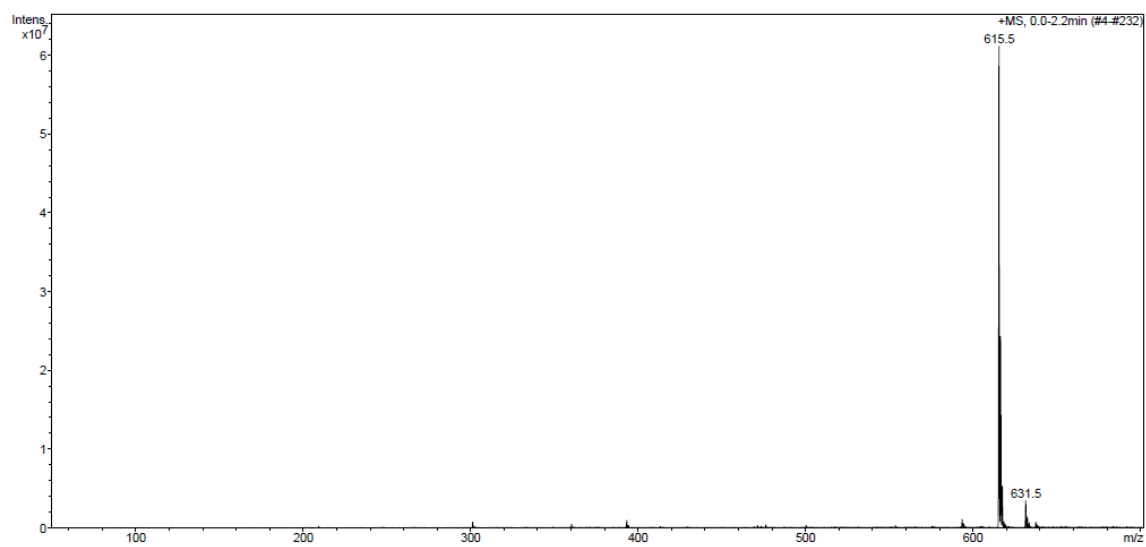

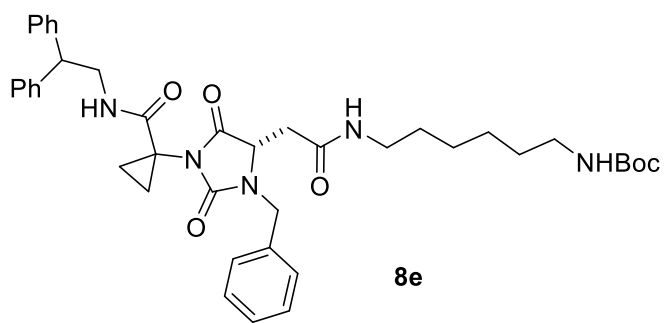

<sup>1</sup>H-NMR (400 MHz, CD<sub>3</sub>OD)

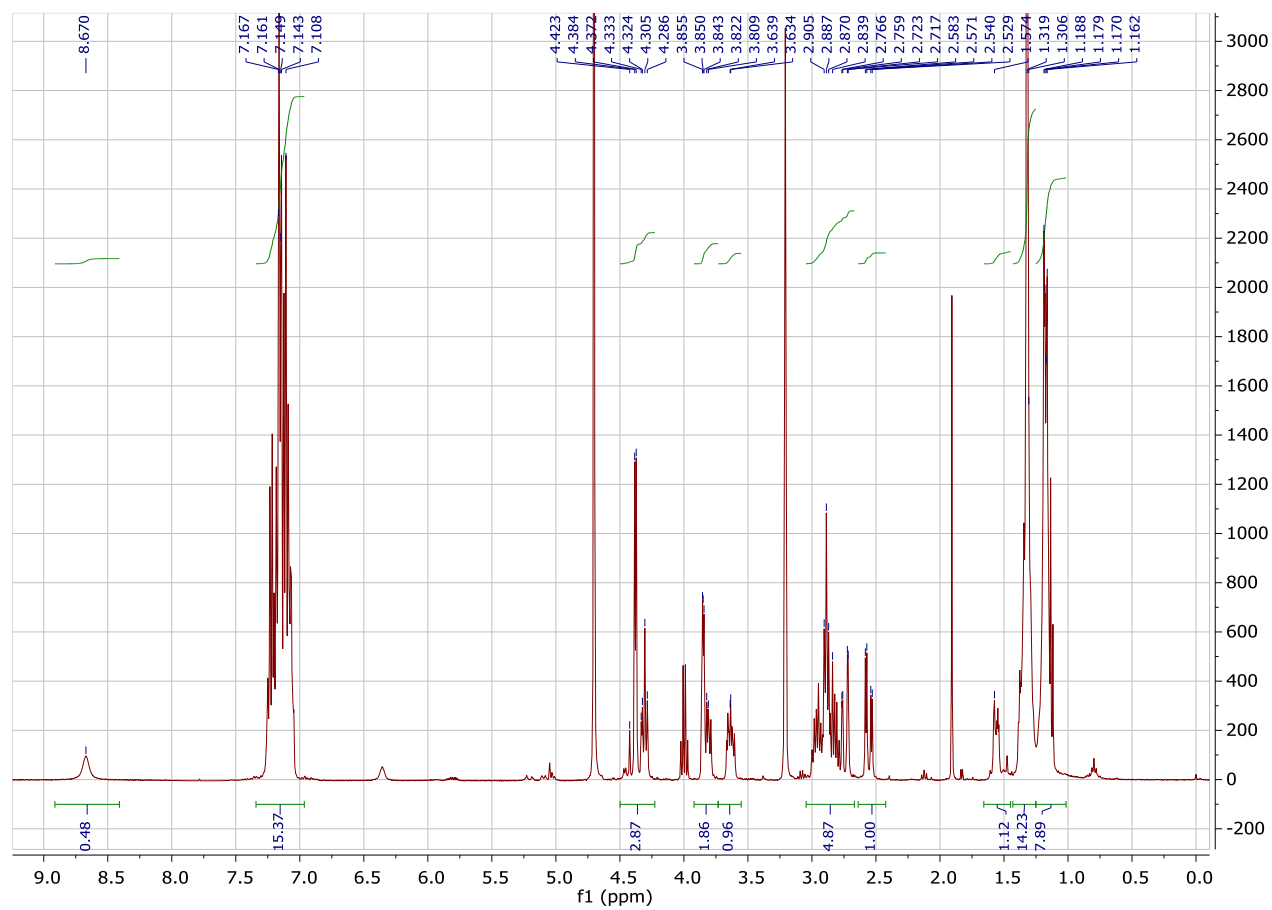



$^{13}\text{C}\{^1\text{H}\}$ -NMR (101 MHz,  $\text{CD}_3\text{OD}$ )

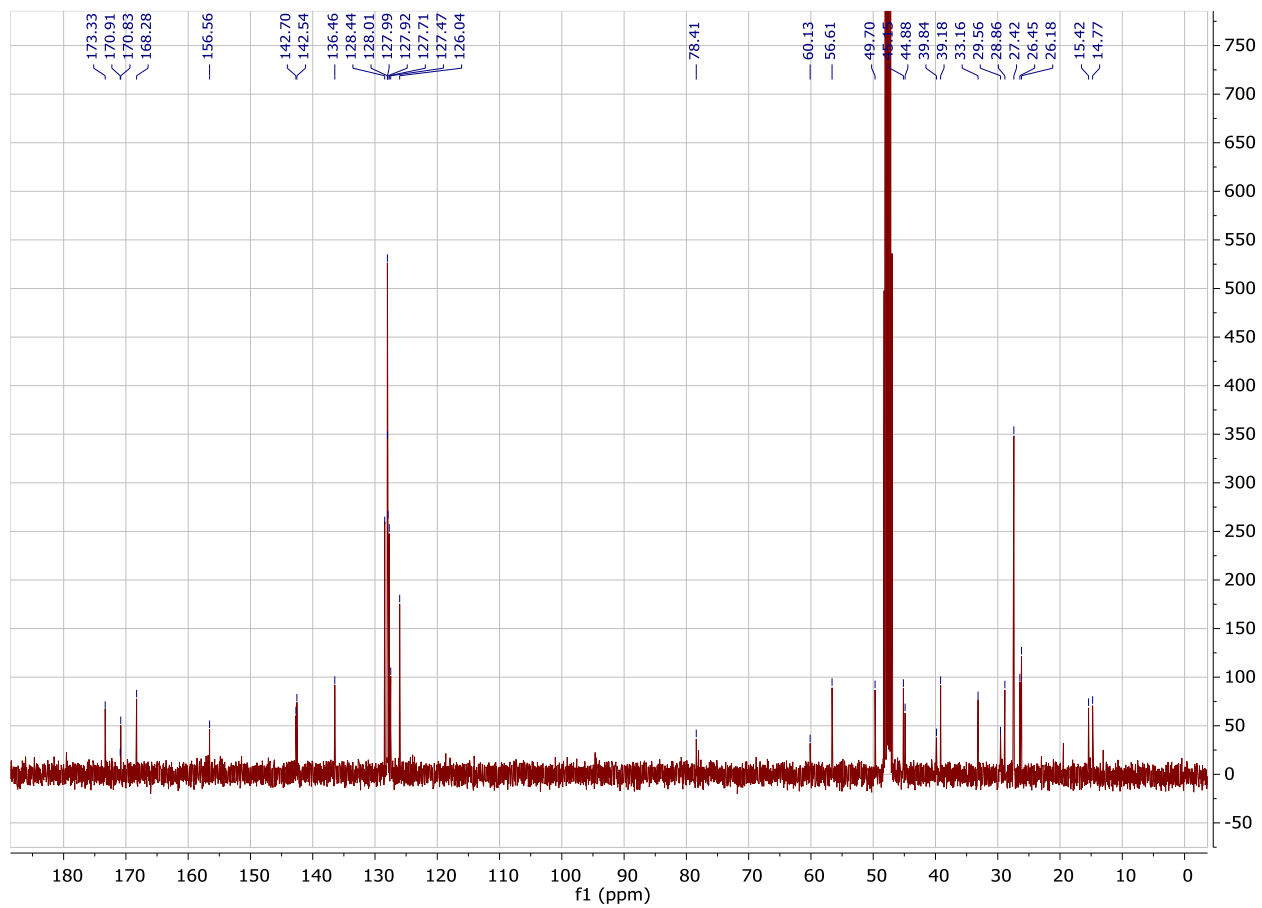

-L.G.S. - Laboratorio Grandi Strumenti - Display Report

Analysis Name av gc113.d  
Sample Name  
Comment 1 mg/ml dil 1:100 MeOH  
Richiedente: Cristina

Acquisition Date 03/06/19 14:49:10  
Method Copy of \_01tmix\_posneg  
Im.MS

Operator Walter Panzeri  
Instrument esquire3000plus

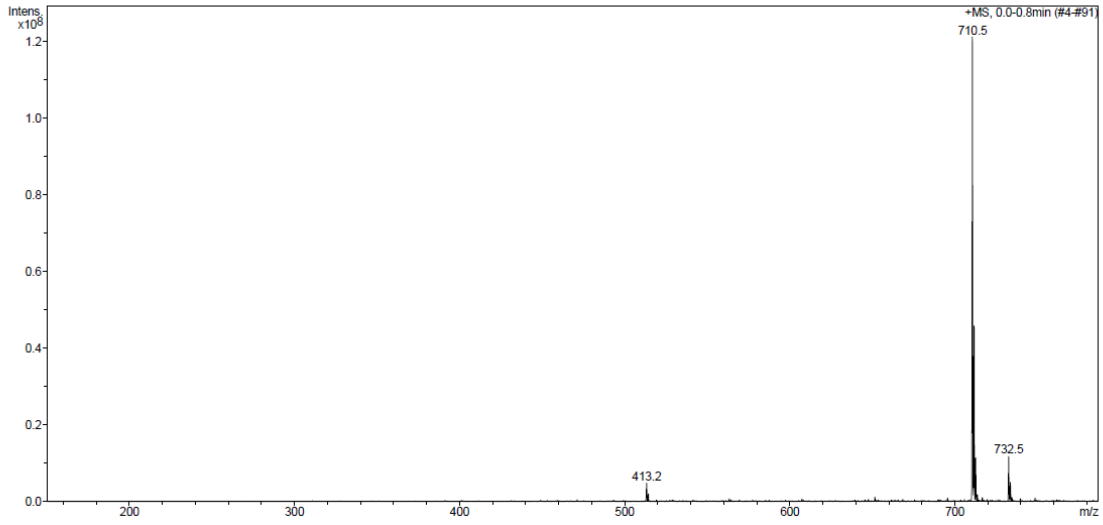

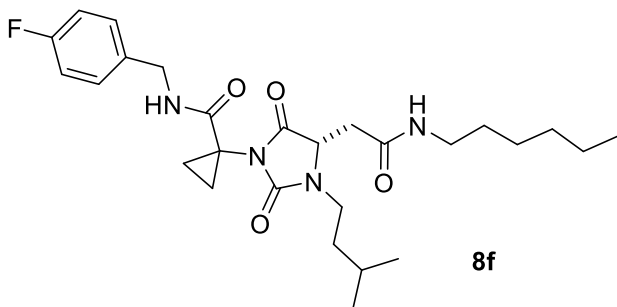

$^1\text{H-NMR}$  (400 MHz,  $\text{CD}_3\text{OD}$ )

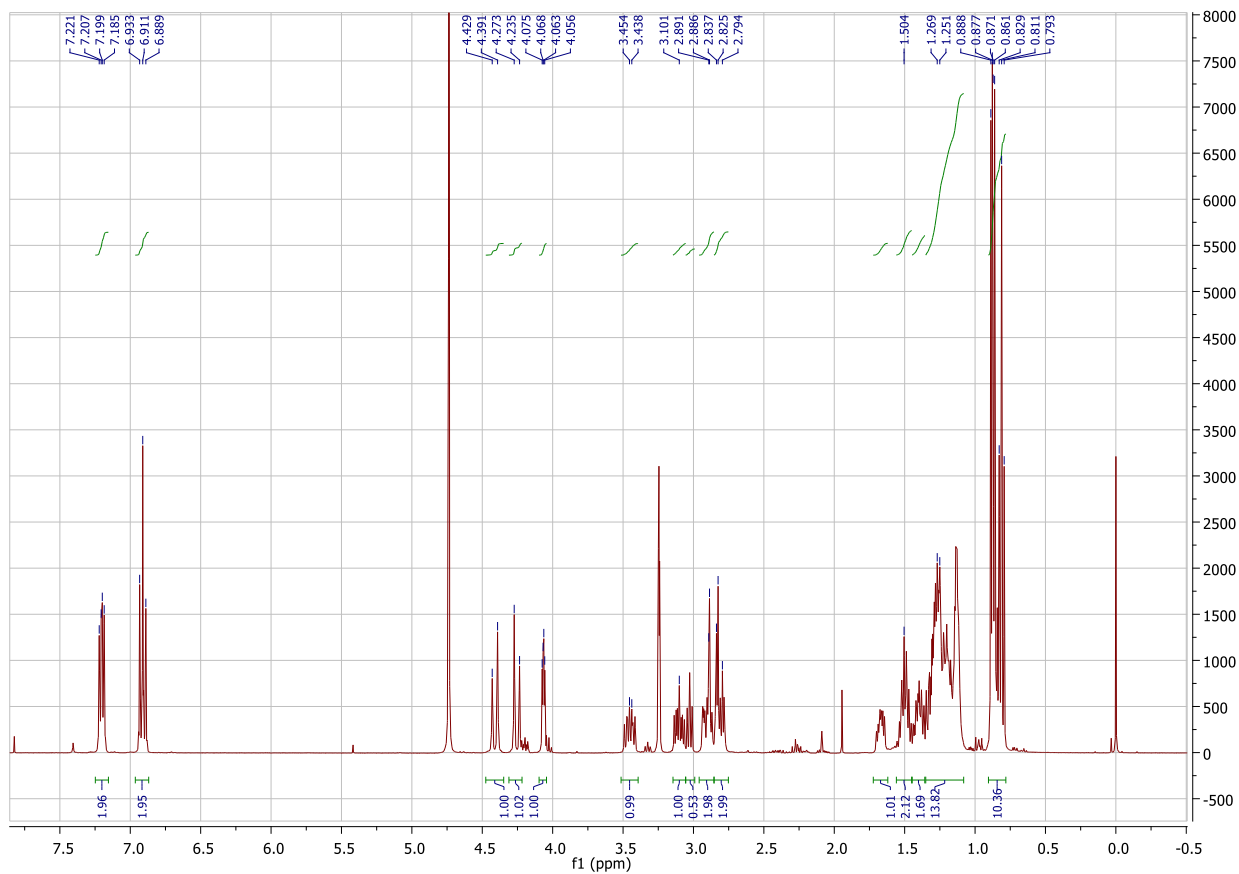

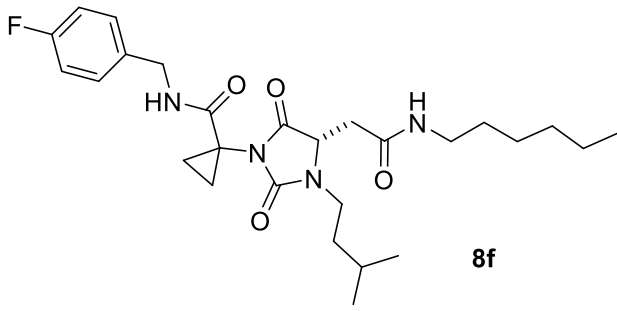

$^{13}\text{C}\{^1\text{H}\}$ -NMR (101 MHz,  $\text{CD}_3\text{OD}$ )

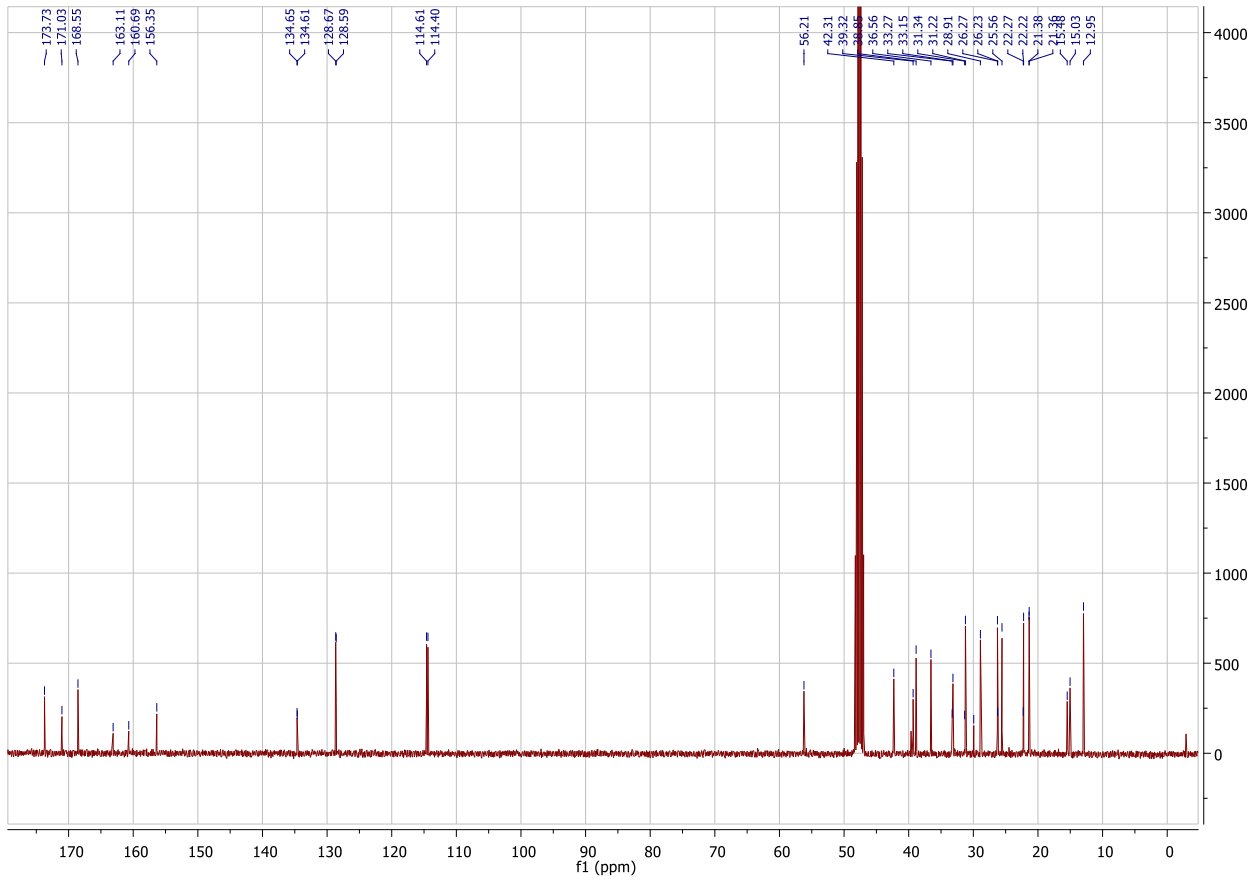

# -L.G.S. - Laboratorio Grandi Strumenti - Display Report

Analysis Name: av ac132c.d  
Sample Name: 1 mg/ml dil 1:100 MeOH  
Comment: Richiedente: Caramiello  
Acquisition Date: 04/13/21 15:57:54  
Method: Copy of \$PW\_TBLM.MS  
Operator: Walter Panzeri  
Instrument: esquire3000plus

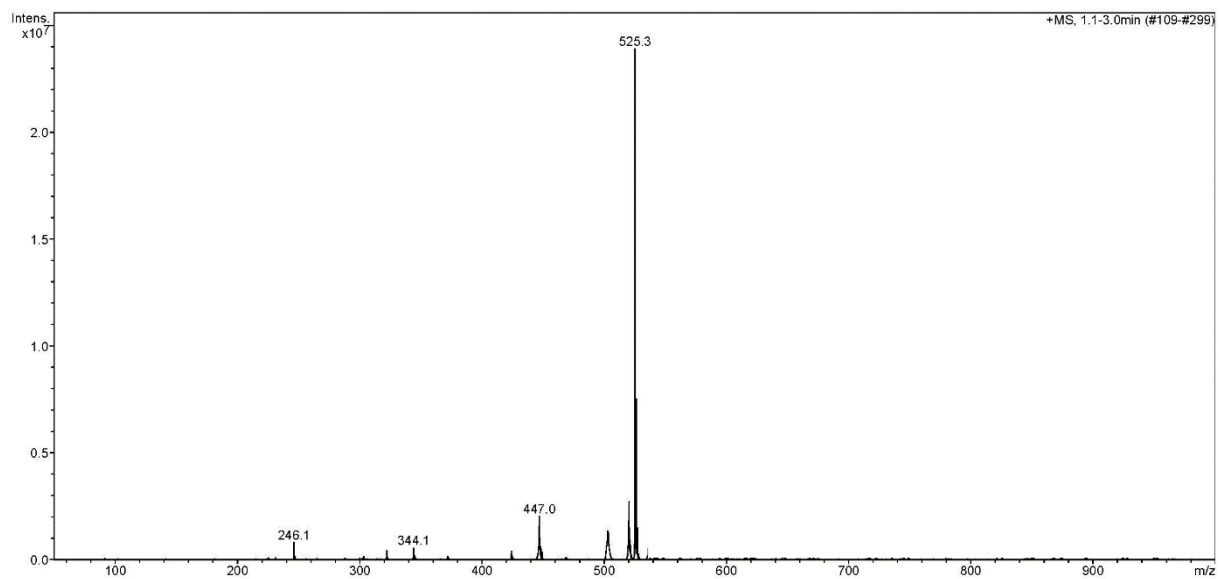

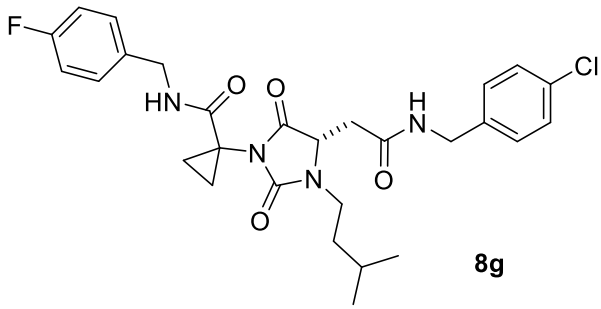

$^1\text{H-NMR}$  (101 MHz,  $\text{CD}_3\text{OD}$ )

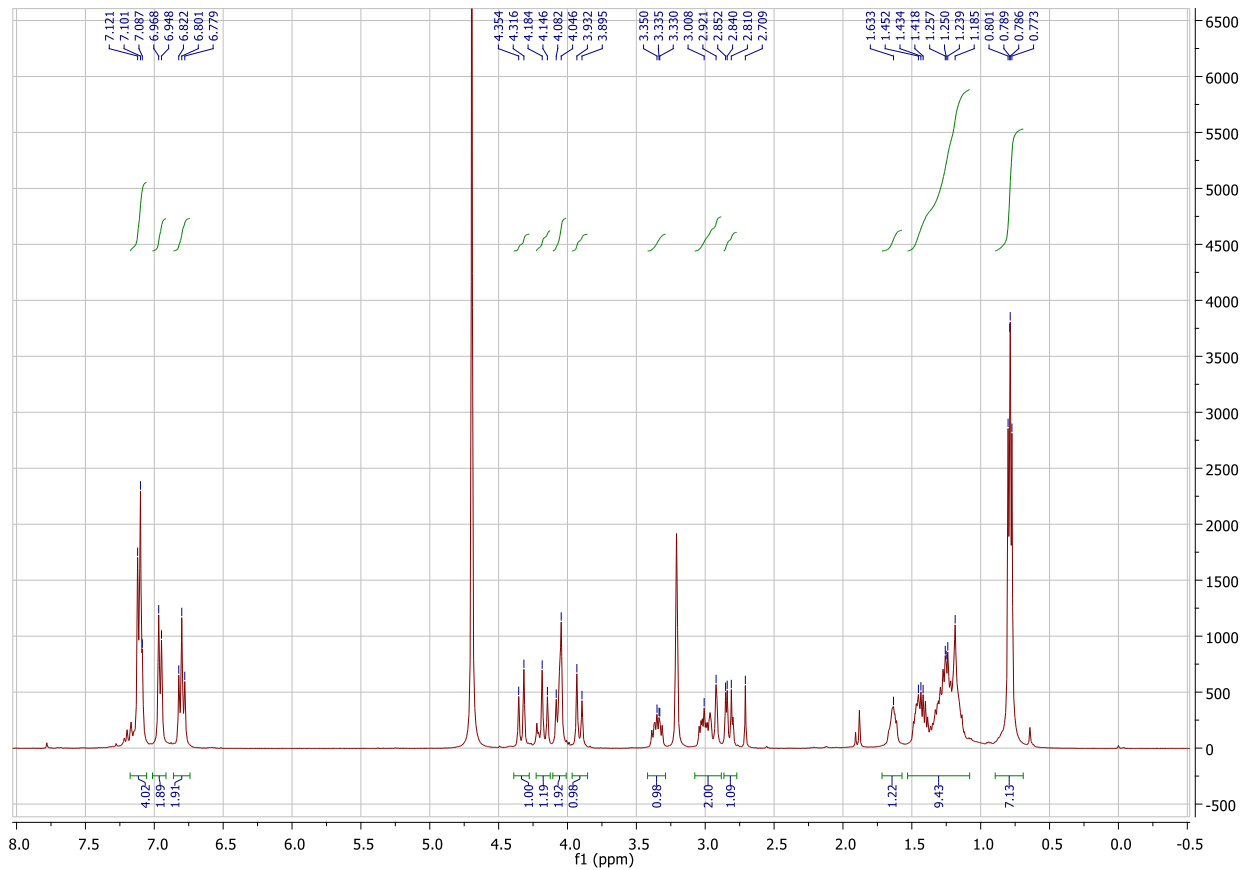





$^{13}\text{C}\{^1\text{H}\}$ -NMR (101 MHz,  $\text{CD}_3\text{OD}$ )

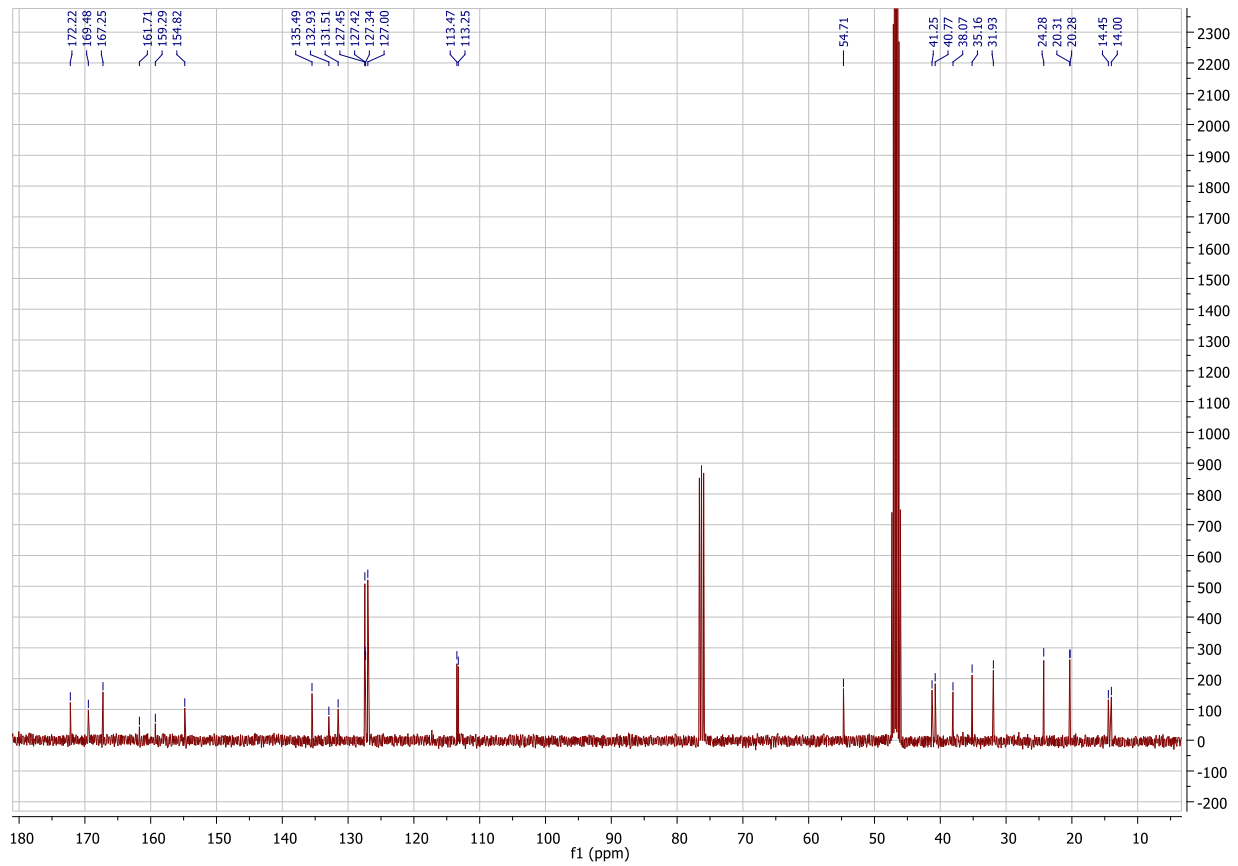

**-L.G.S. - Laboratorio Grandi Strumenti - Display Report**

Analysis Name av.ms2057.d  
Sample Name  
Comment 1 mg/mL dil 1:100 MeOH  
Richiedente: Sani

Acquisition Date 07/08/22 09:17:41  
Method Copy of Sopt0622.MS

Operator  
Instrument

Walter Panzeri  
esquire3000plus

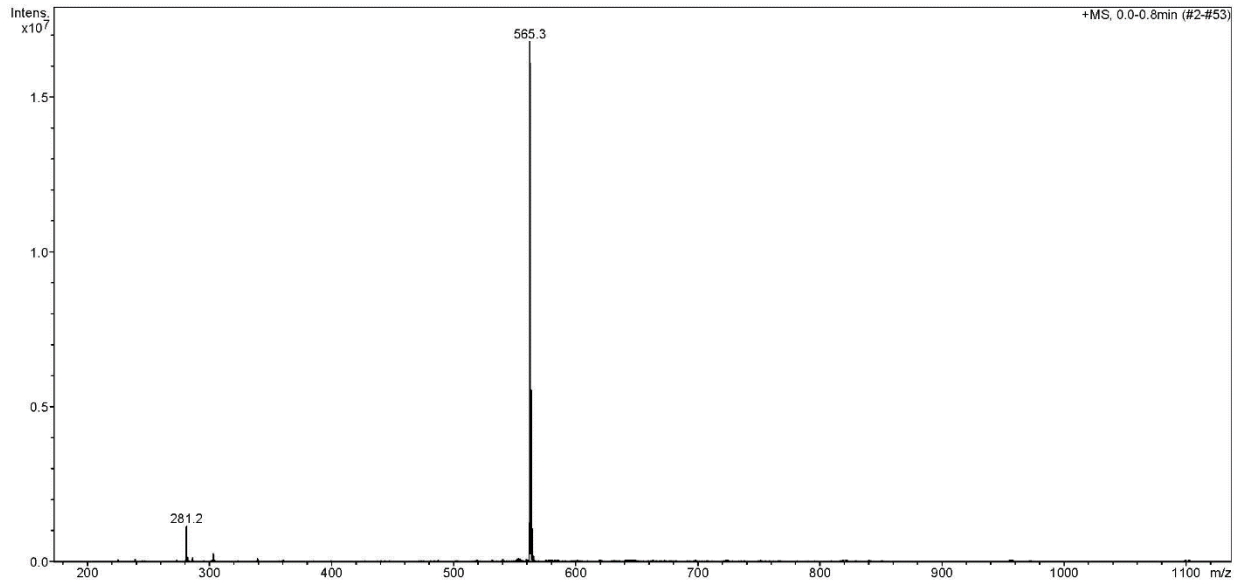

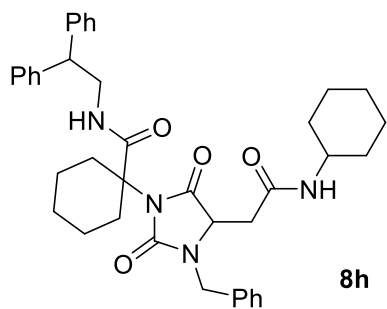

$^1\text{H-NMR}$  (400 MHz,  $\text{CDCl}_3$ )

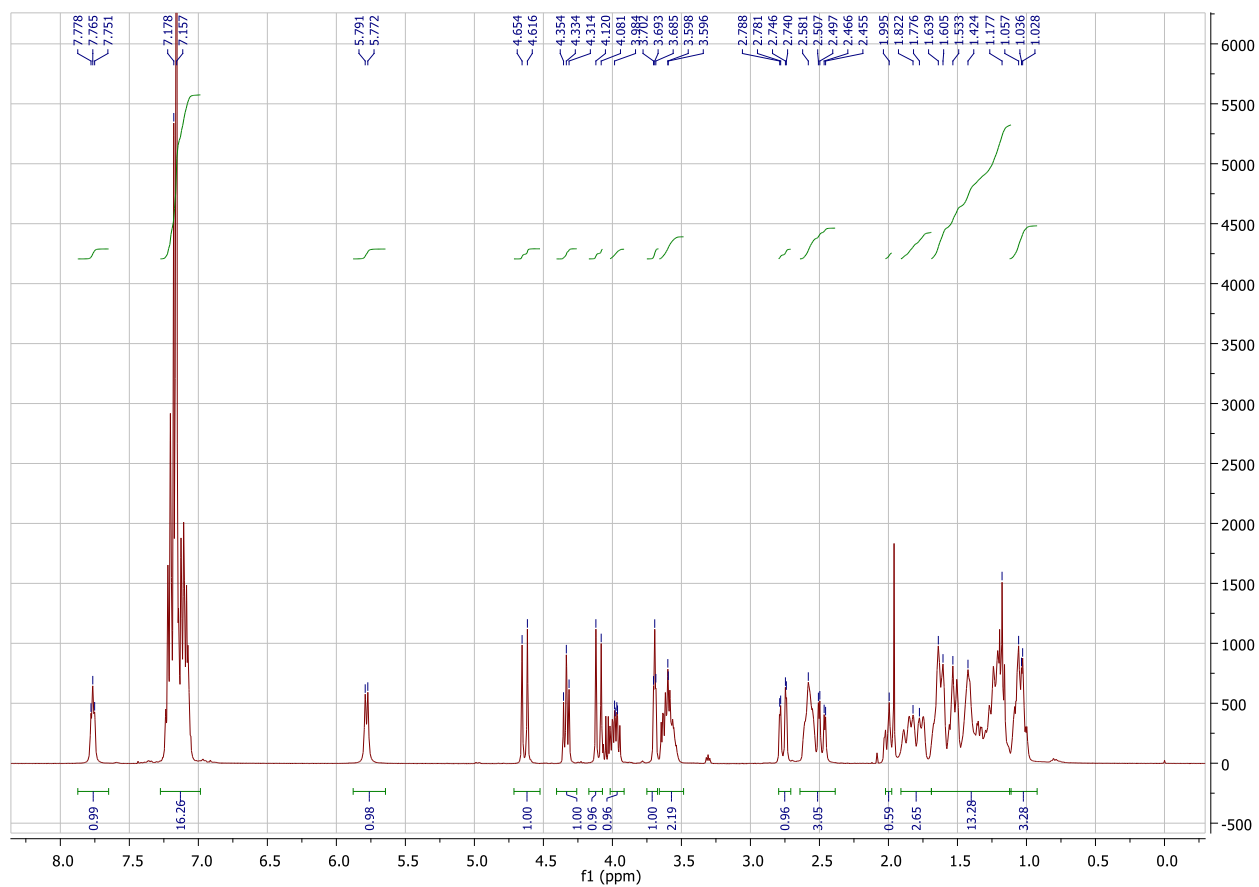

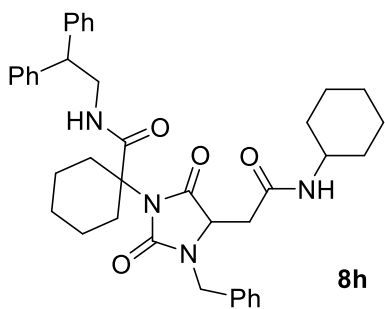

$^{13}\text{C}\{^1\text{H}\}$ -NMR (101 MHz,  $\text{CDCl}_3$ )

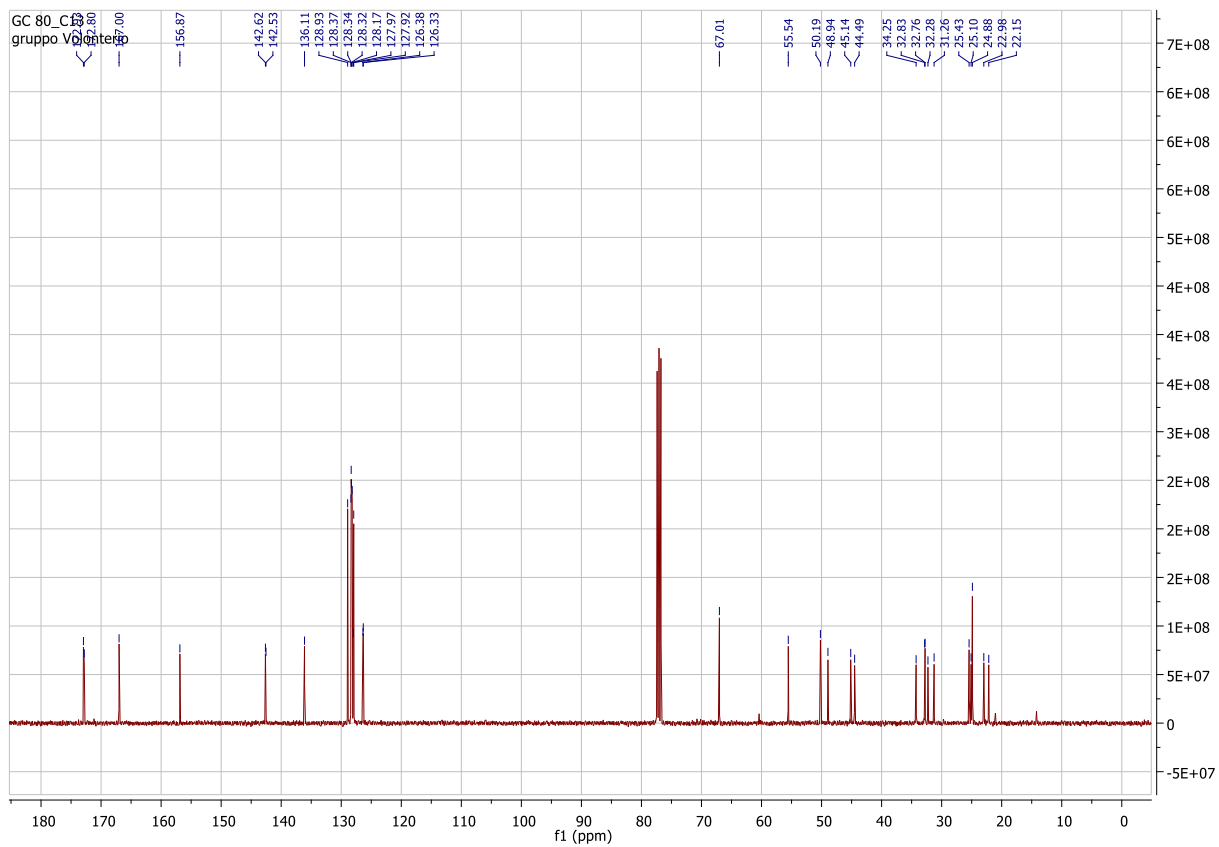

-L.G.S. - Laboratorio Grandi Strumenti - Display Report

Analysis Name av gc80.d Acquisition Date 09/14/18 10:53:50 Operator Walter Panzeri  
Sample Name Method Copy of \_01tmix\_posneg Instrument esquire3000plus  
Comment 1 mg/ml dil 1:100 MeOH Im.MS  
Richiedente: Cristina

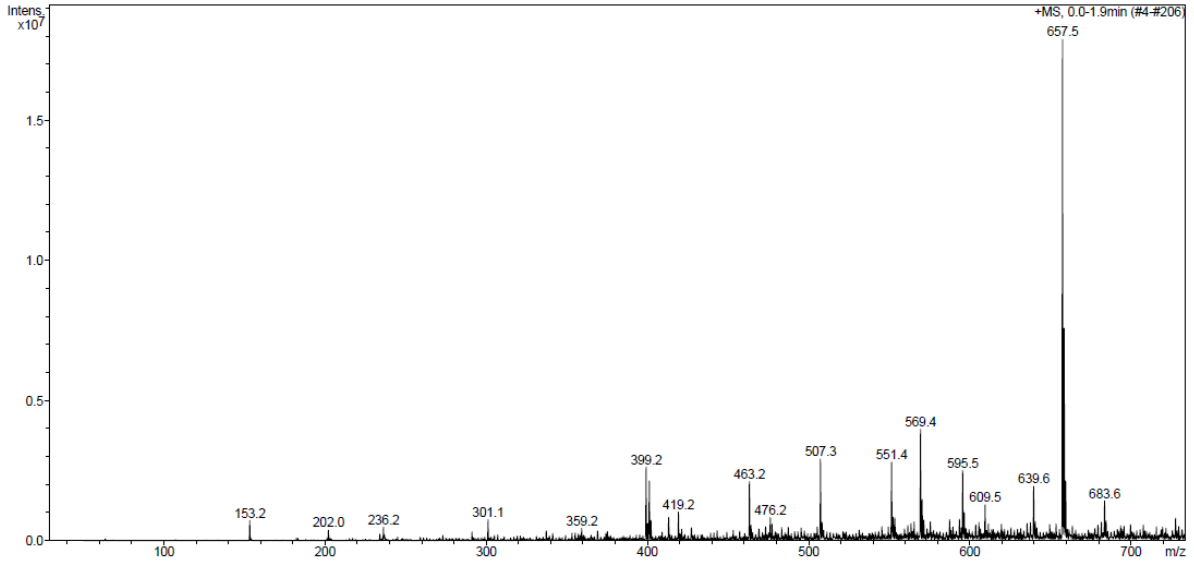

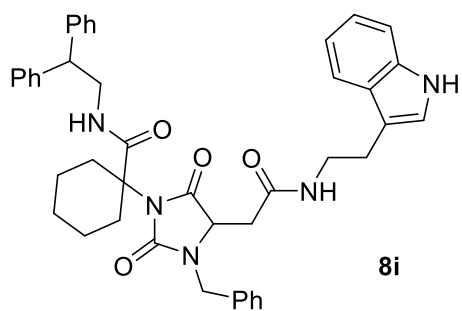

$^1\text{H-NMR}$  (400 MHz,  $\text{CDCl}_3$ )

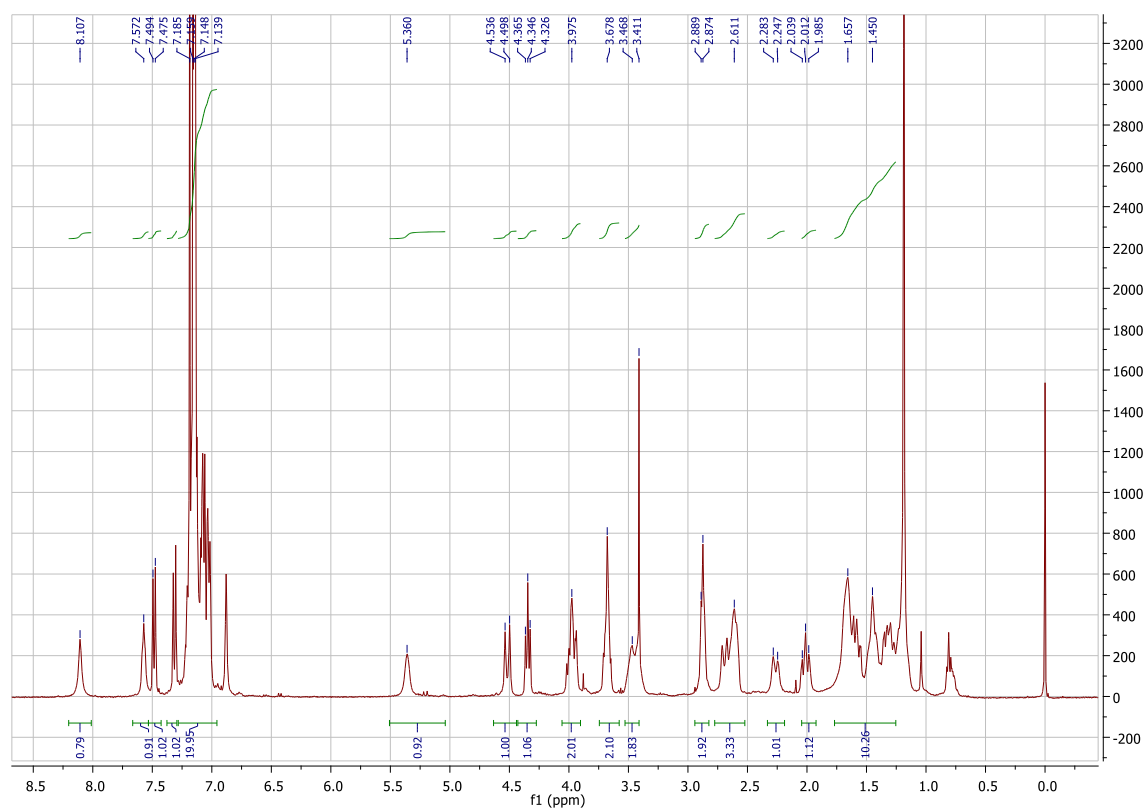



$^{13}\text{C}\{^1\text{H}\}$ -NMR (101 MHz,  $\text{CDCl}_3$ )

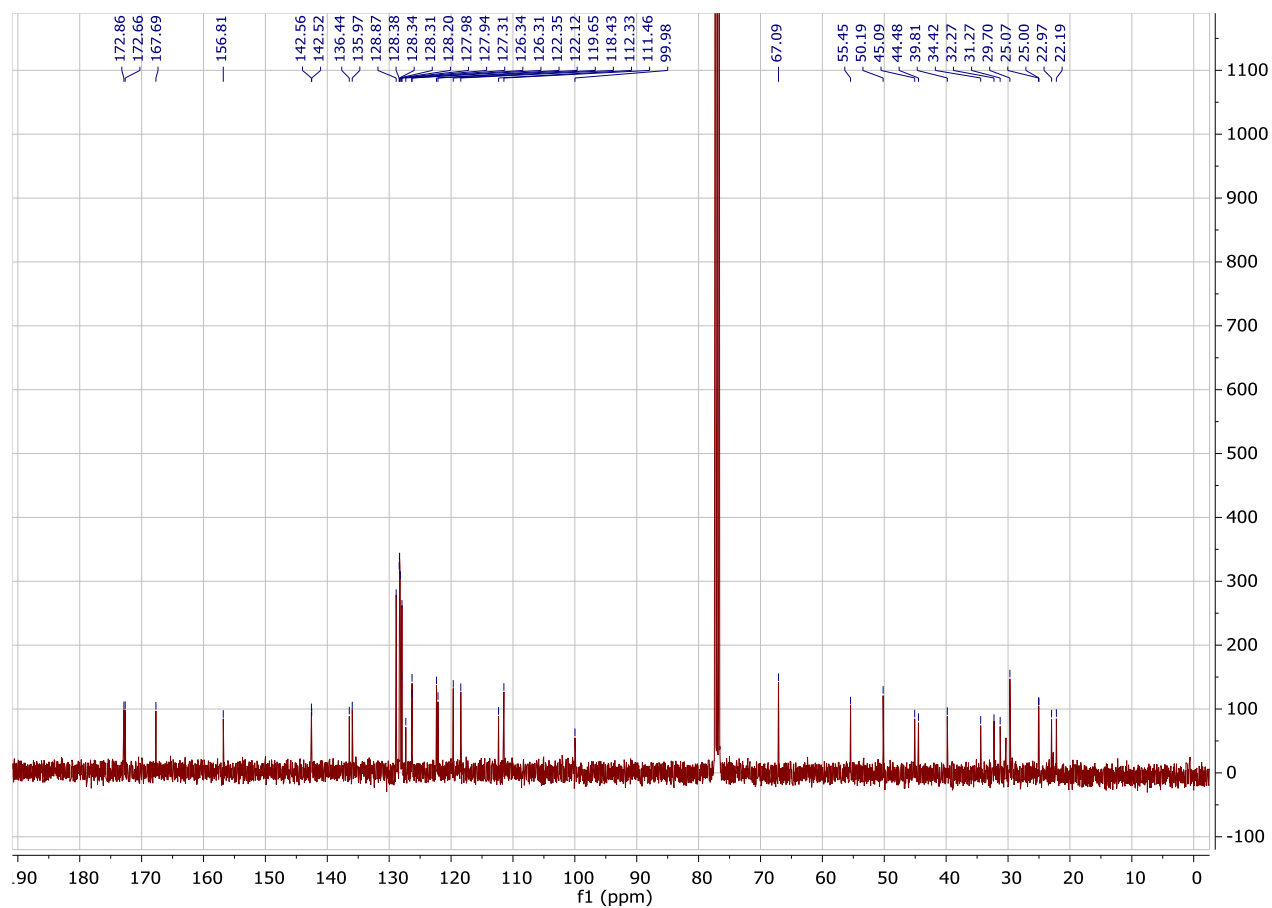

**-L.G.S. - Laboratorio Grandi Strumenti - Display Report**

|               |                                               |                  |                        |            |                 |
|---------------|-----------------------------------------------|------------------|------------------------|------------|-----------------|
| Analysis Name | av md20g_f.d                                  | Acquisition Date | 04/24/19 14:19:55      | Operator   | Walter Panzeri  |
| Sample Name   |                                               | Method           | Copy of _01tmix_posneg | Instrument | esquire3000plus |
| Comment       | 1 mg/ml dil 1:100 CH3CN<br>Richiedente: Viani |                  | Im.MS                  |            |                 |

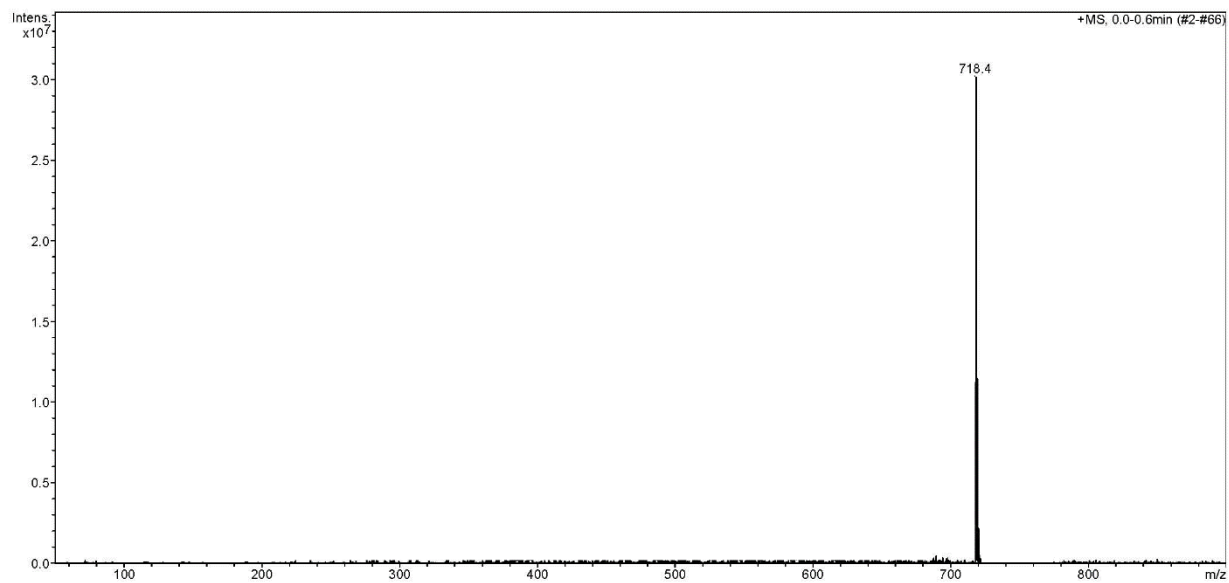



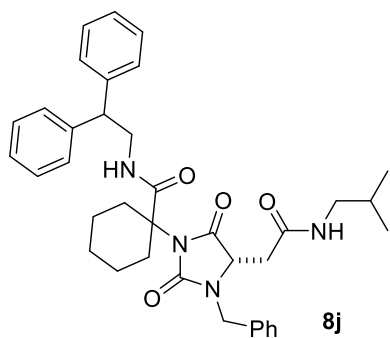

$^1\text{H-NMR}$  (400 MHz,  $\text{CDCl}_3$ )

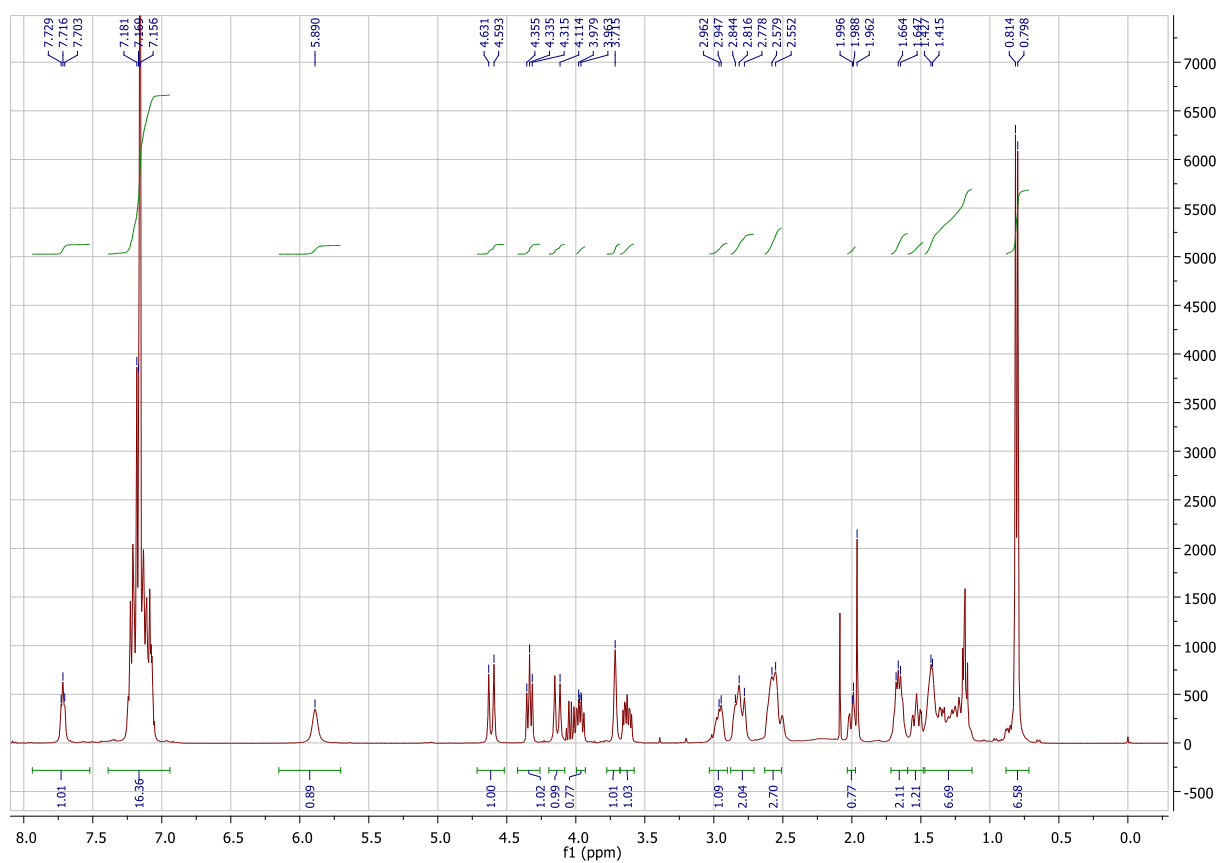



$^{13}\text{C}\{^1\text{H}\}$ -NMR (101 MHz,  $\text{CDCl}_3$ )

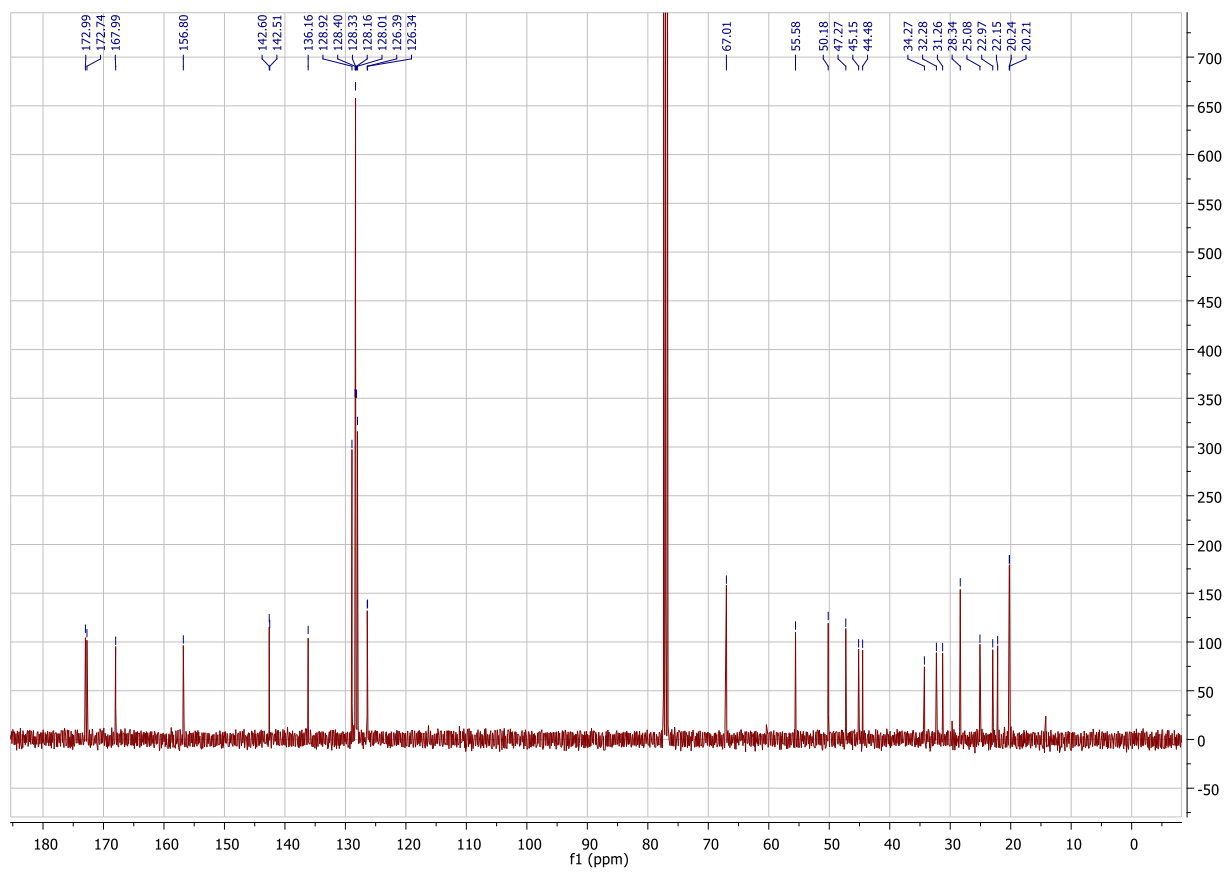

-L.G.S. - Laboratorio Grandi Strumenti - Display Report

Analysis Name av ac176a.d  
Sample Name  
Comment 1 mg/ml dil 1:100 MeOH  
Richiedente: Caramiello

Acquisition Date 02/02/22 14:07:38  
Method Copy of \$opt0922.MS

Operator Walter Panzeri  
Instrument esquire3000plus

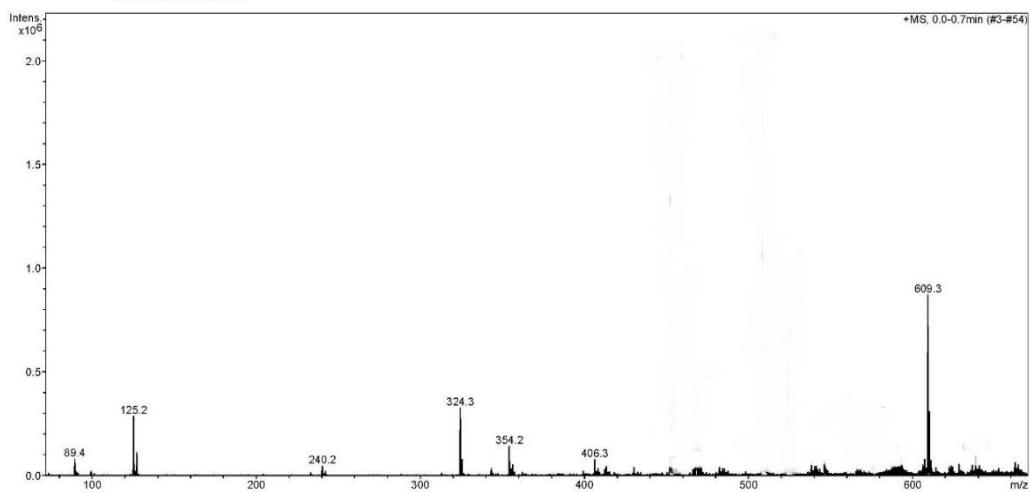

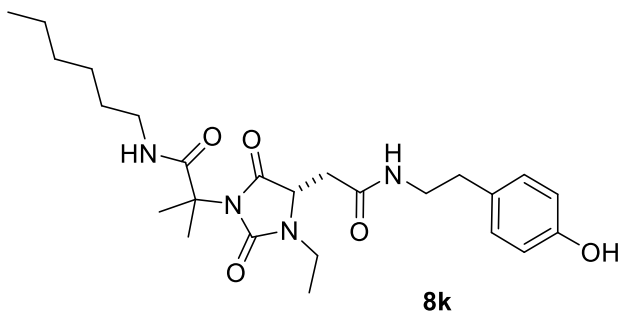

$^1\text{H-NMR}$  (400 MHz,  $\text{CD}_3\text{OD}$ )

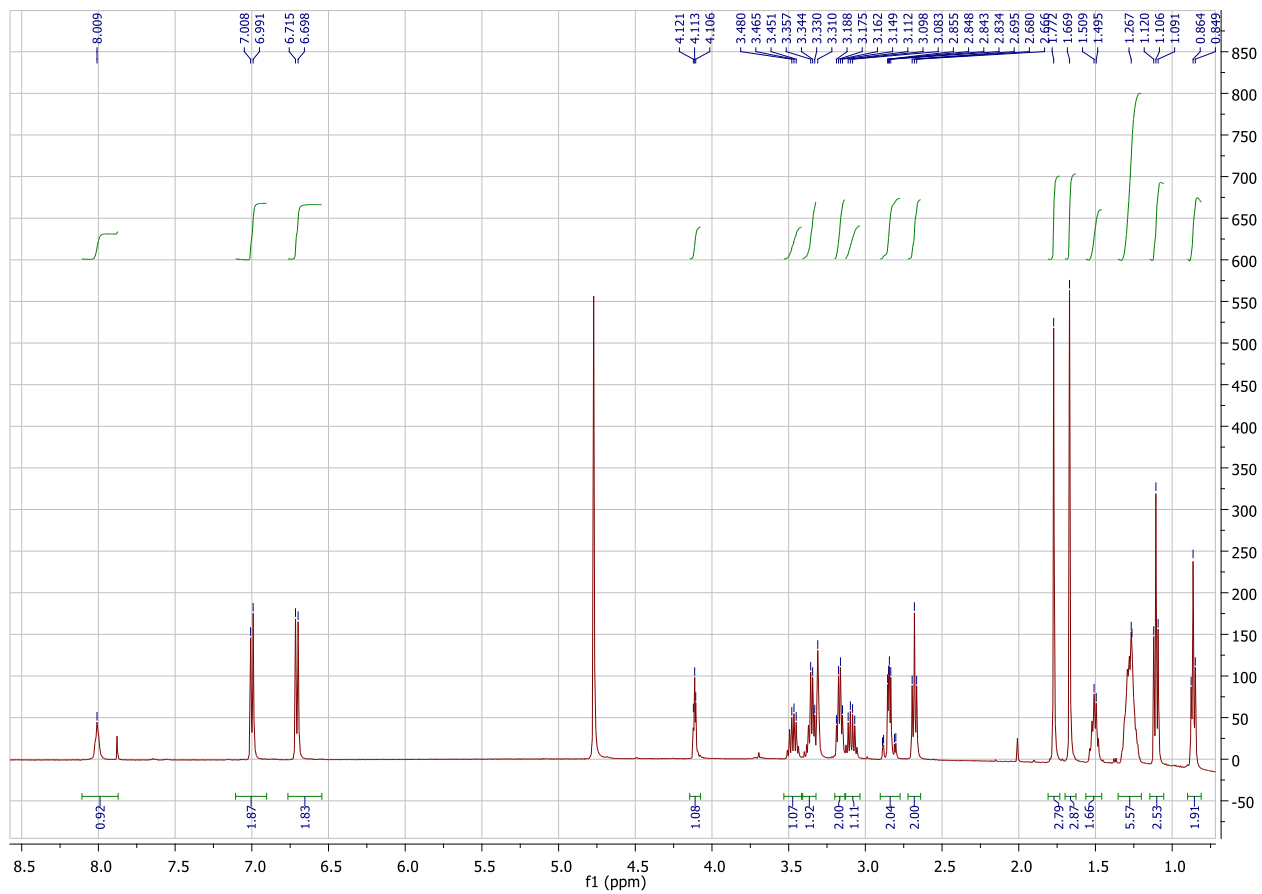

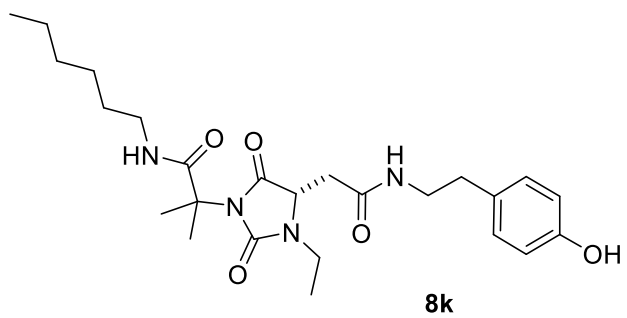

$^{13}\text{C}\{^1\text{H}\}$ -NMR (101 MHz,  $\text{CD}_3\text{OD}$ )

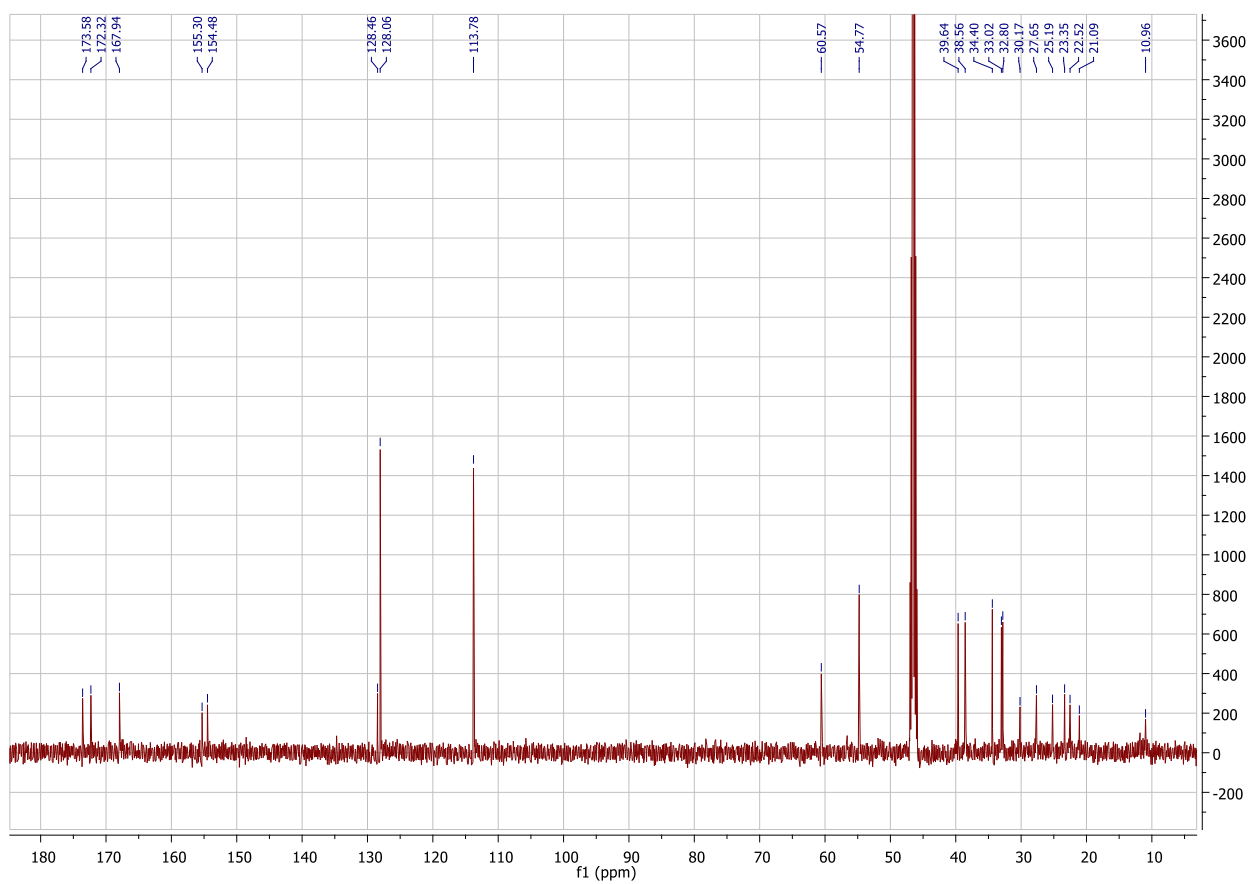

-L.G.S. - Laboratorio Grandi Strumenti - Display Report

Analysis Name av\_gc22b.d  
Sample Name  
Comment 1 mg/ml dil 1:100 CH3CN  
Richiedente: Cristina

Acquisition Date 02/08/18 14:19:50  
Method Copy of \_01tmix\_posneg  
In.MS

Operator Walter Panzeri  
Instrument esquire3000plus

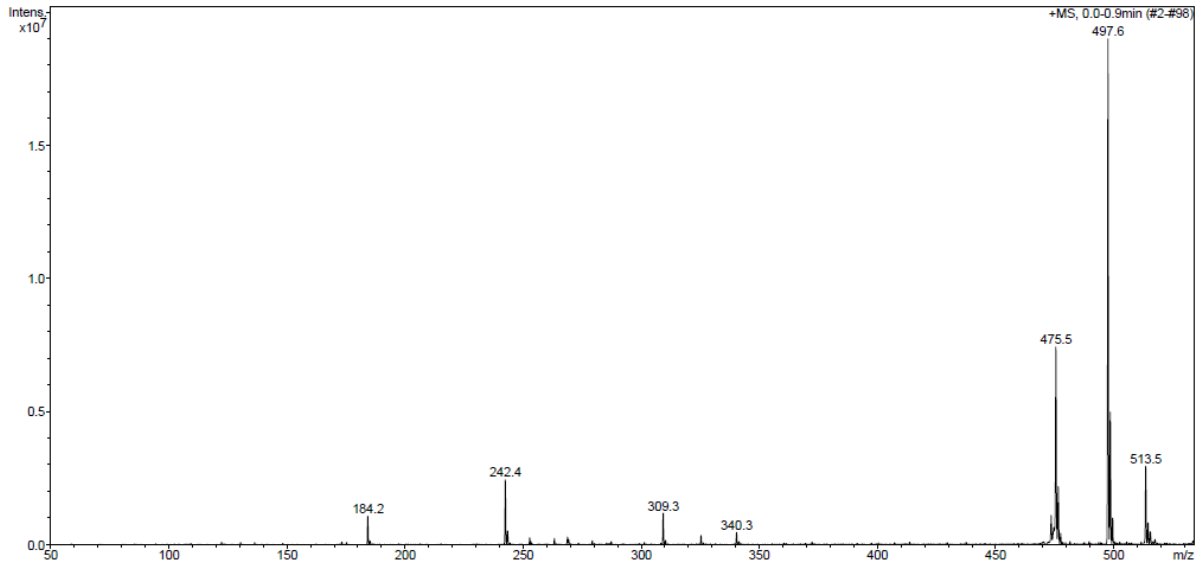

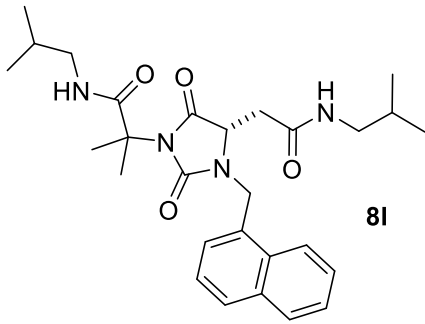

<sup>1</sup>H-NMR (400 MHz, CD<sub>3</sub>OD)

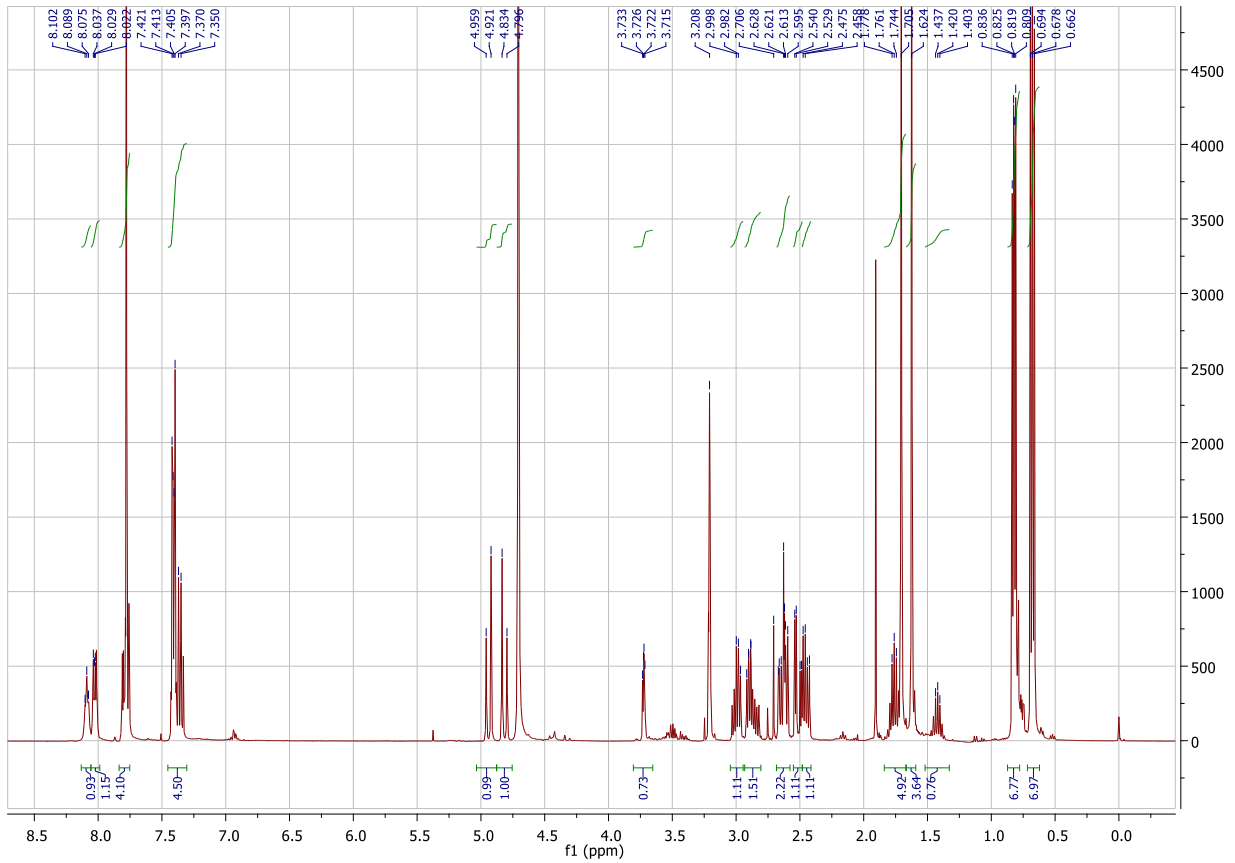

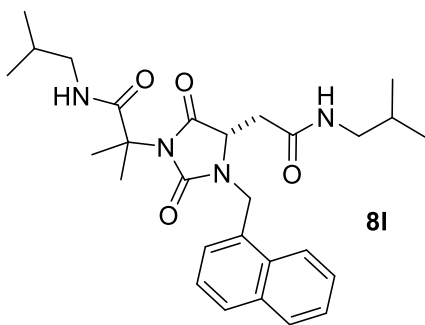

$^{13}\text{C}\{^1\text{H}\}$ -NMR (101 MHz,  $\text{CD}_3\text{OD}$ )

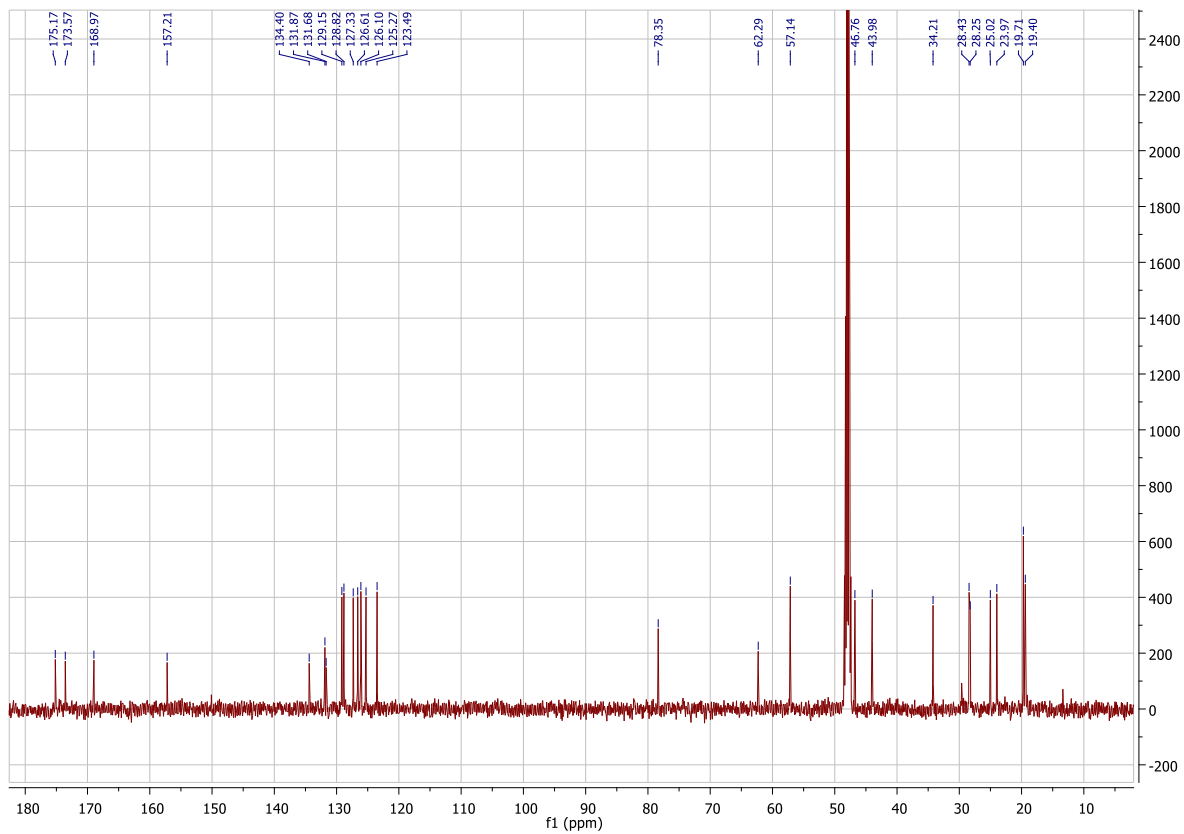



-L.G.S. - Laboratorio Grandi Strumenti - Display Report

Analysis Name av gc62.d  
Sample Name  
Comment 1 mg/ml dil 1:100 MeOH  
Richiedente: Cristina

Acquisition Date 06/13/18 10:46:23  
Method Copy of \_01tmix\_posneg  
Im.MS

Operator  
Instrument

Walter Panzeri  
esquire3000plus

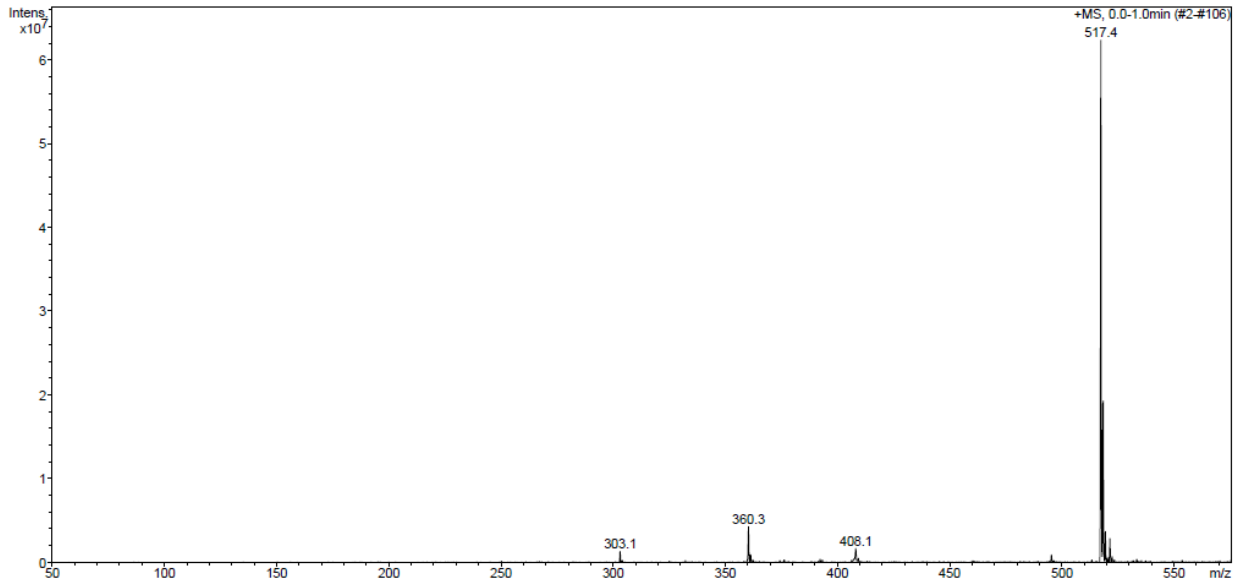

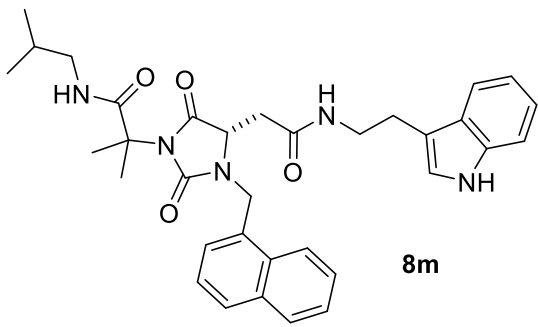

$^1\text{H-NMR}$  (400 MHz,  $\text{CD}_3\text{OD}$ )

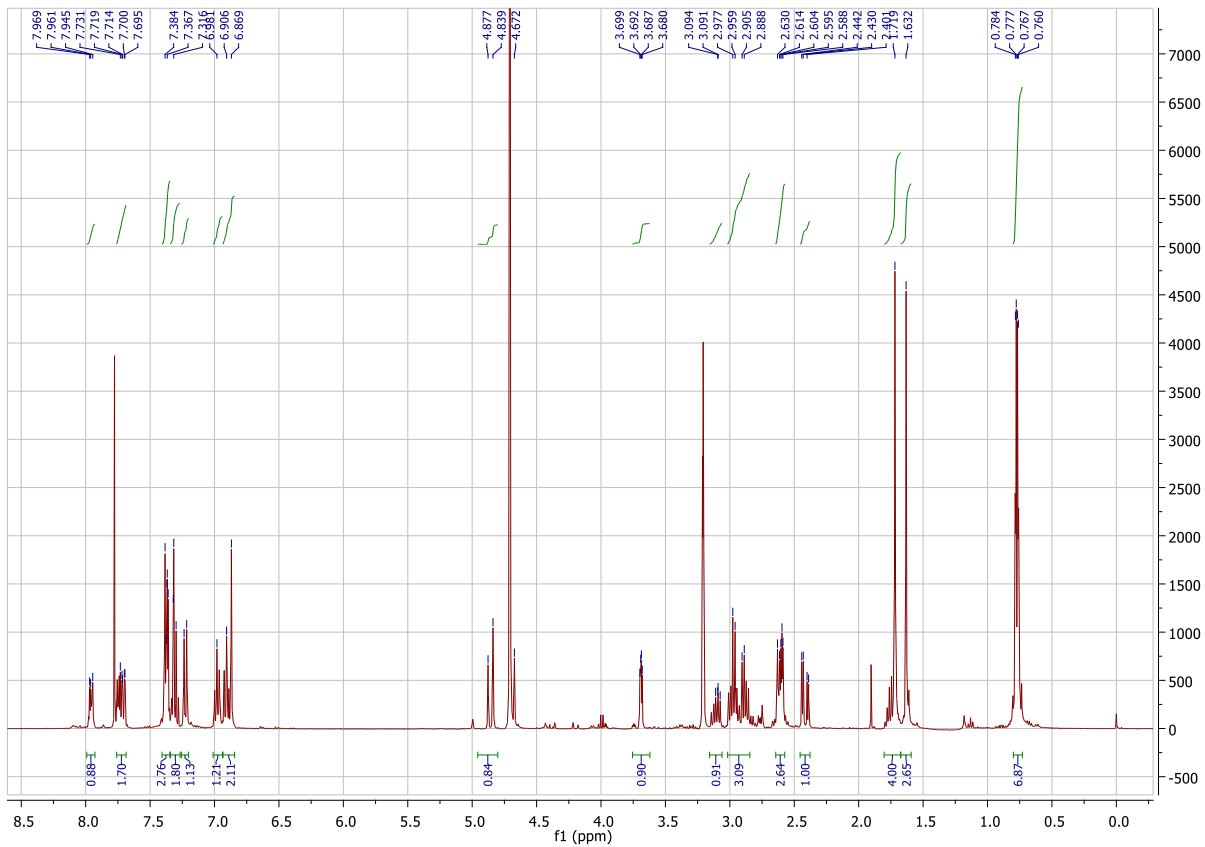



$^{13}\text{C}\{^1\text{H}\}$ -NMR (101 MHz,  $\text{CD}_3\text{OD}$ )

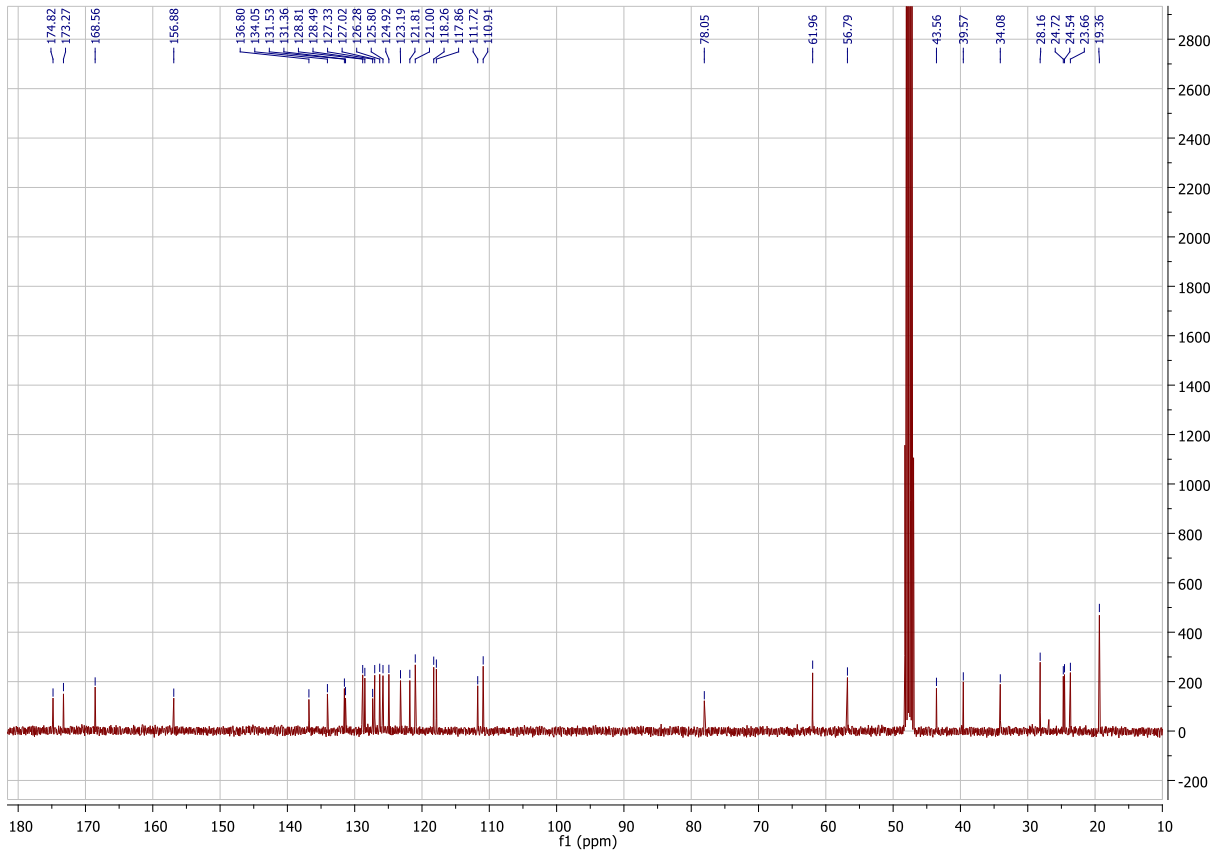

-L.G.S. - Laboratorio Grandi Strumenti - Display Report

Analysis Name k.ms1671.d  
Sample Name  
Comment 1 mg/ml dil 1:100 MeOH  
Richiedente: Sani

Acquisition Date 03/28/18 11:55:09  
Method Copy\_of\_01tmix\_posneg  
Im.MS

Operator Walter Panzeri  
Instrument esquire3000plus

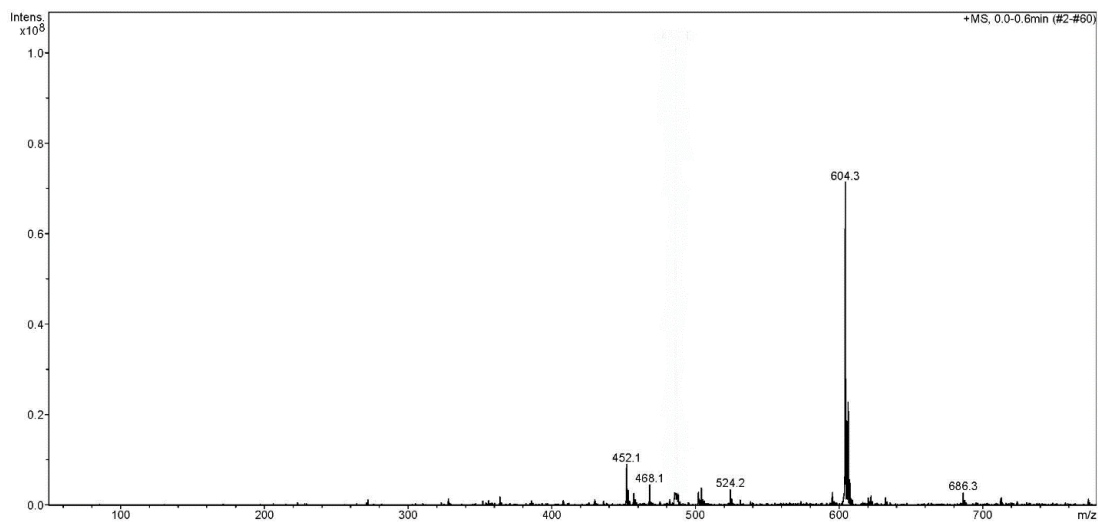

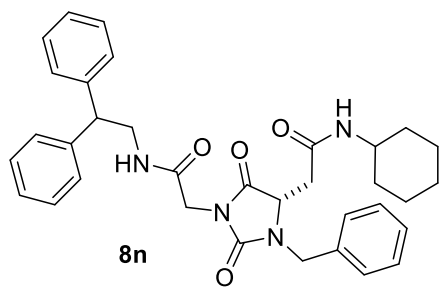

$^1\text{H-NMR}$  (400 MHz,  $\text{CDCl}_3$ )

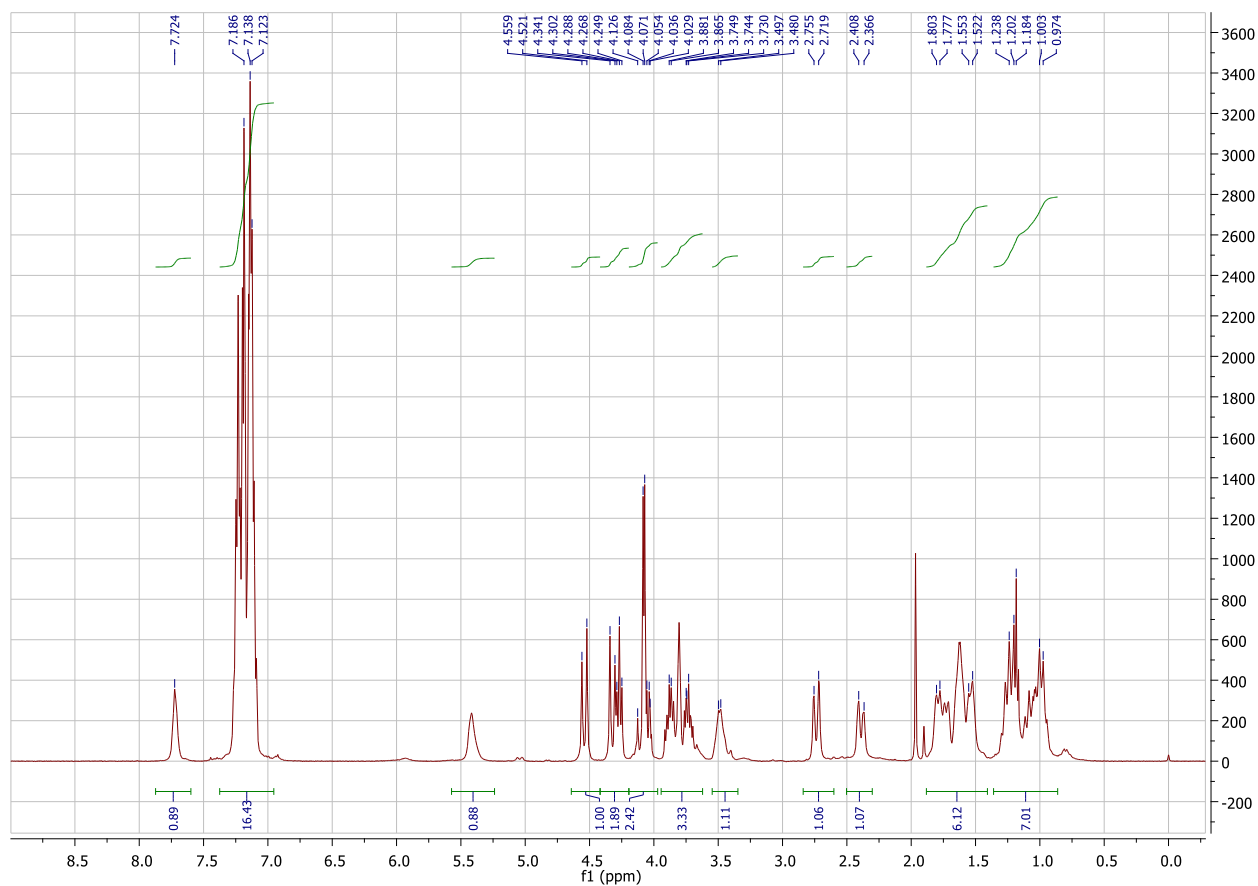



$^{13}\text{C}\{^1\text{H}\}$ -NMR (101 MHz,  $\text{CDCl}_3$ )

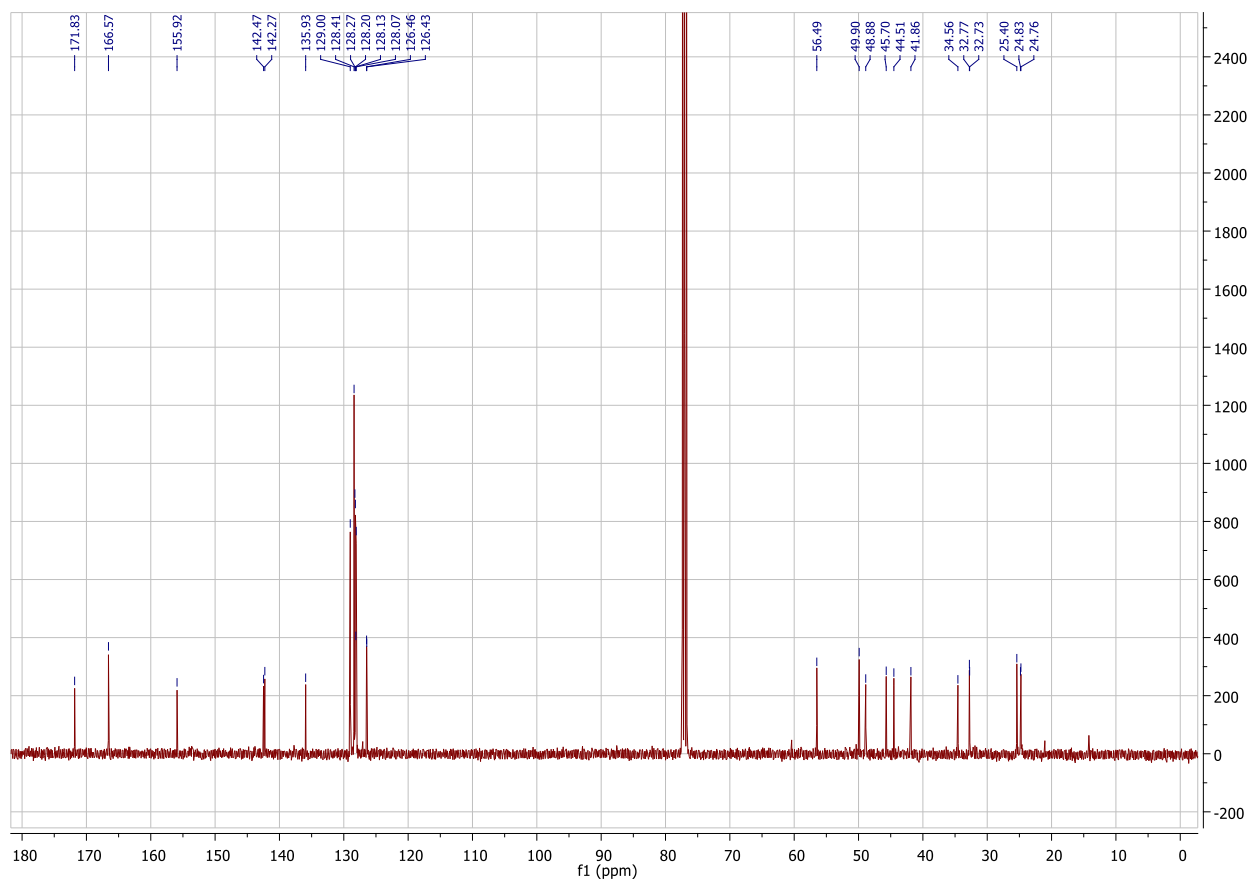

-L.G.S. - Laboratorio Grandi Strumenti - Display Report

|               |                                                 |                  |                                 |            |                 |
|---------------|-------------------------------------------------|------------------|---------------------------------|------------|-----------------|
| Analysis Name | av gc40.d                                       | Acquisition Date | 04/19/18 09:25:10               | Operator   | Walter Panzeri  |
| Sample Name   |                                                 | Method           | Copy of _01tmix_posneg<br>Im.MS | Instrument | esquire3000plus |
| Comment       | 1 mg/ml dil 1:100 MeOH<br>Richiedente: Cristina |                  |                                 |            |                 |

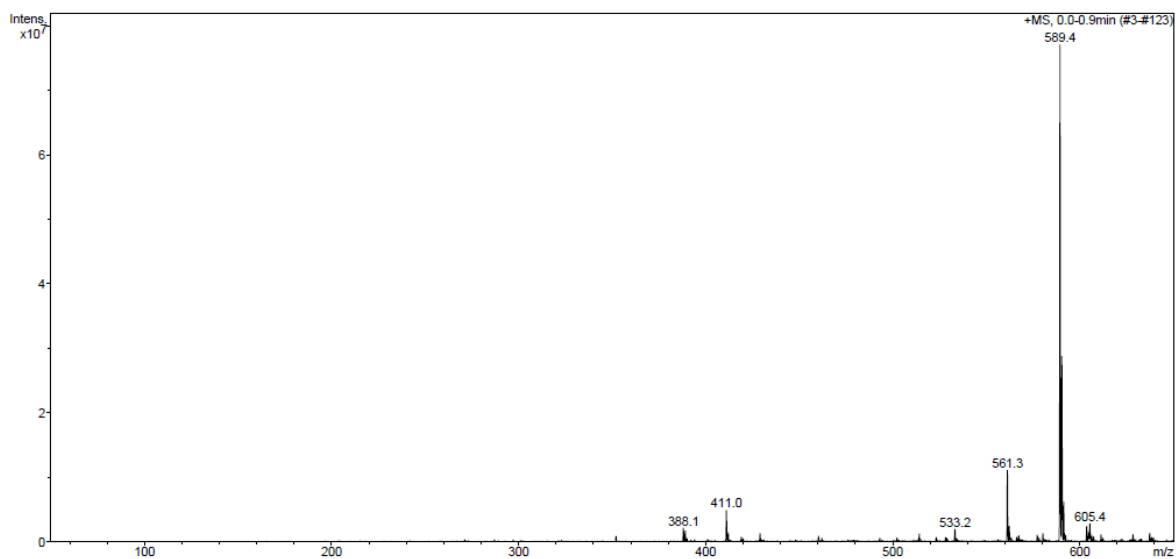

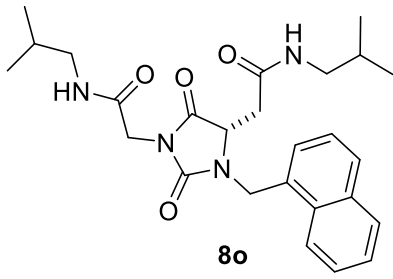

<sup>1</sup>H-NMR (101 MHz, CD<sub>3</sub>OD)

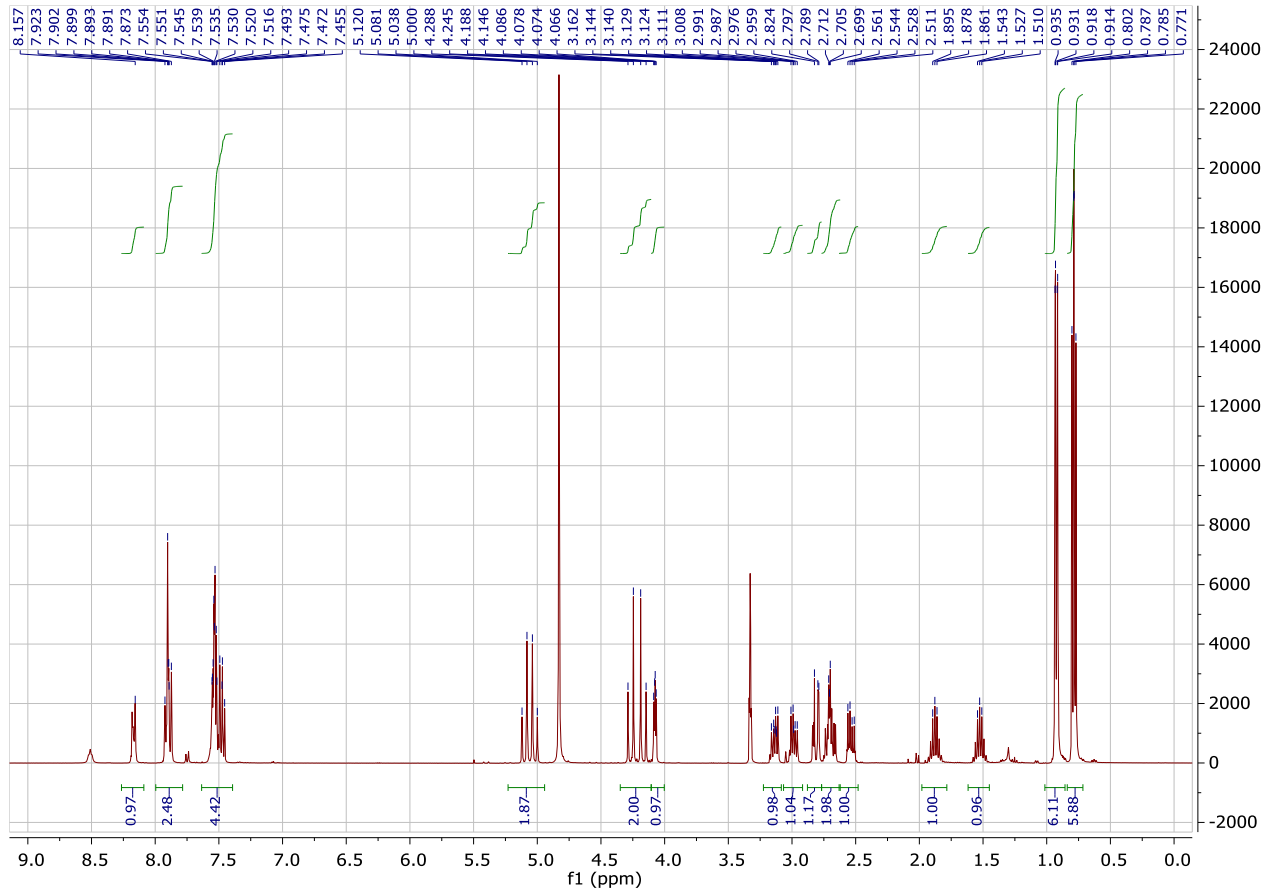





$^{13}\text{C}\{^1\text{H}\}$ -NMR (101 MHz,  $\text{CD}_3\text{OD}$ )

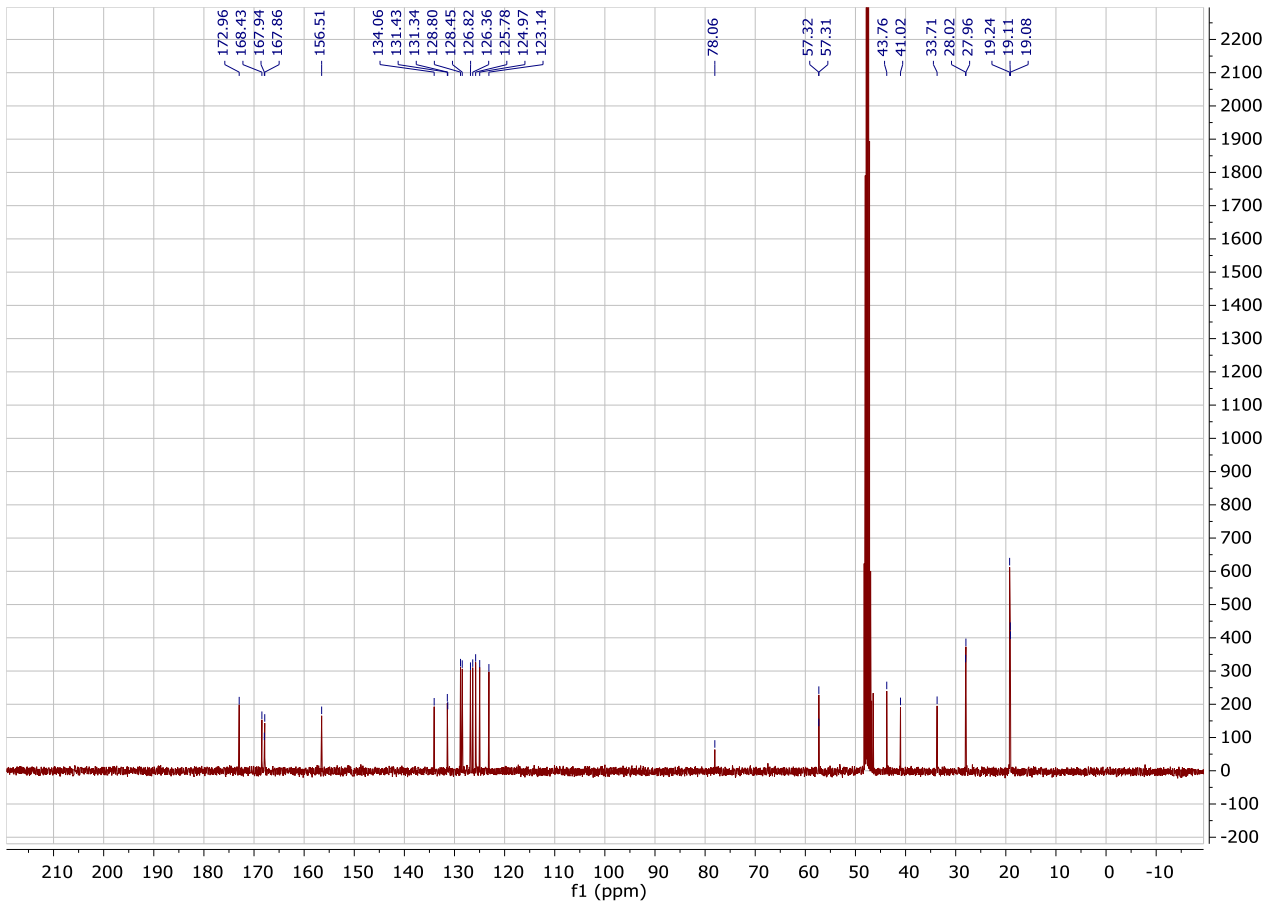

-L.G.S. - Laboratorio Grandi Strumenti - Display Report

Analysis Name av ac065.d  
Sample Name  
Comment 1mg/ml dil 1:100 MeOH  
Richiedente: Caramiello

Acquisition Date 07/20/20 14:27:00  
Method Copy of \_01tmix\_posneg  
In.MS

Operator Walter Panzeri  
Instrument esquire3000plus

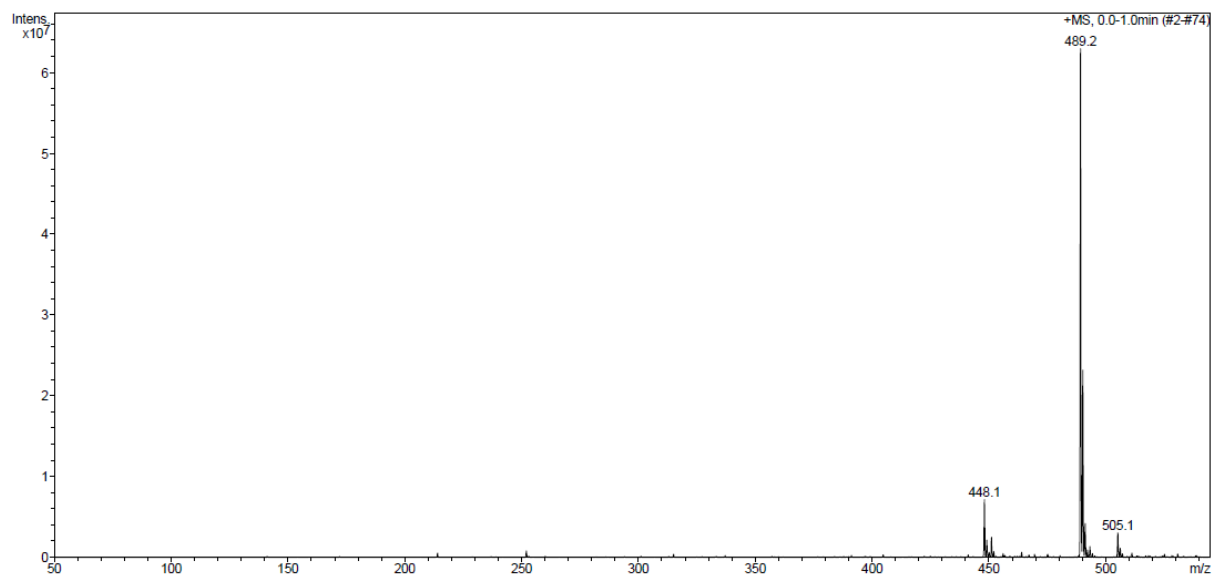

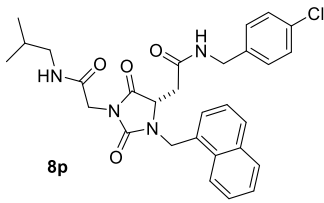

$^1\text{H}$  NMR and COSY in  $\text{CDCl}_3$  (400 MHz)

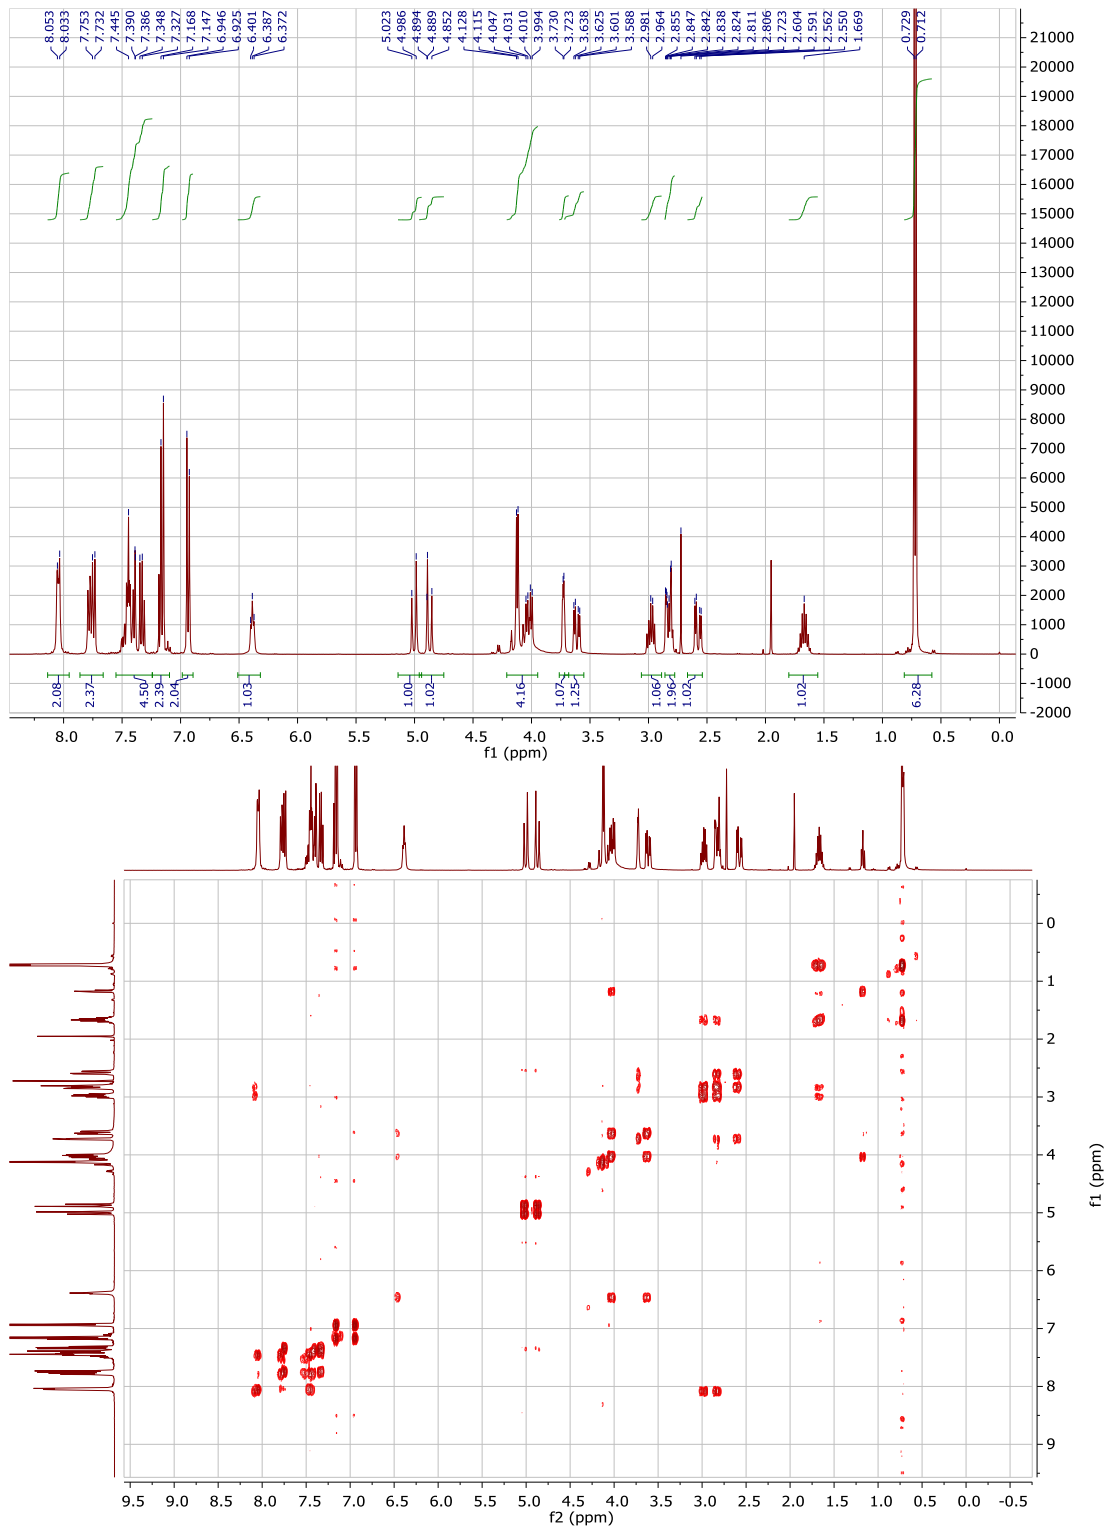

<sup>1</sup>H NMR (400 MHz, dms0-d<sub>6</sub>)

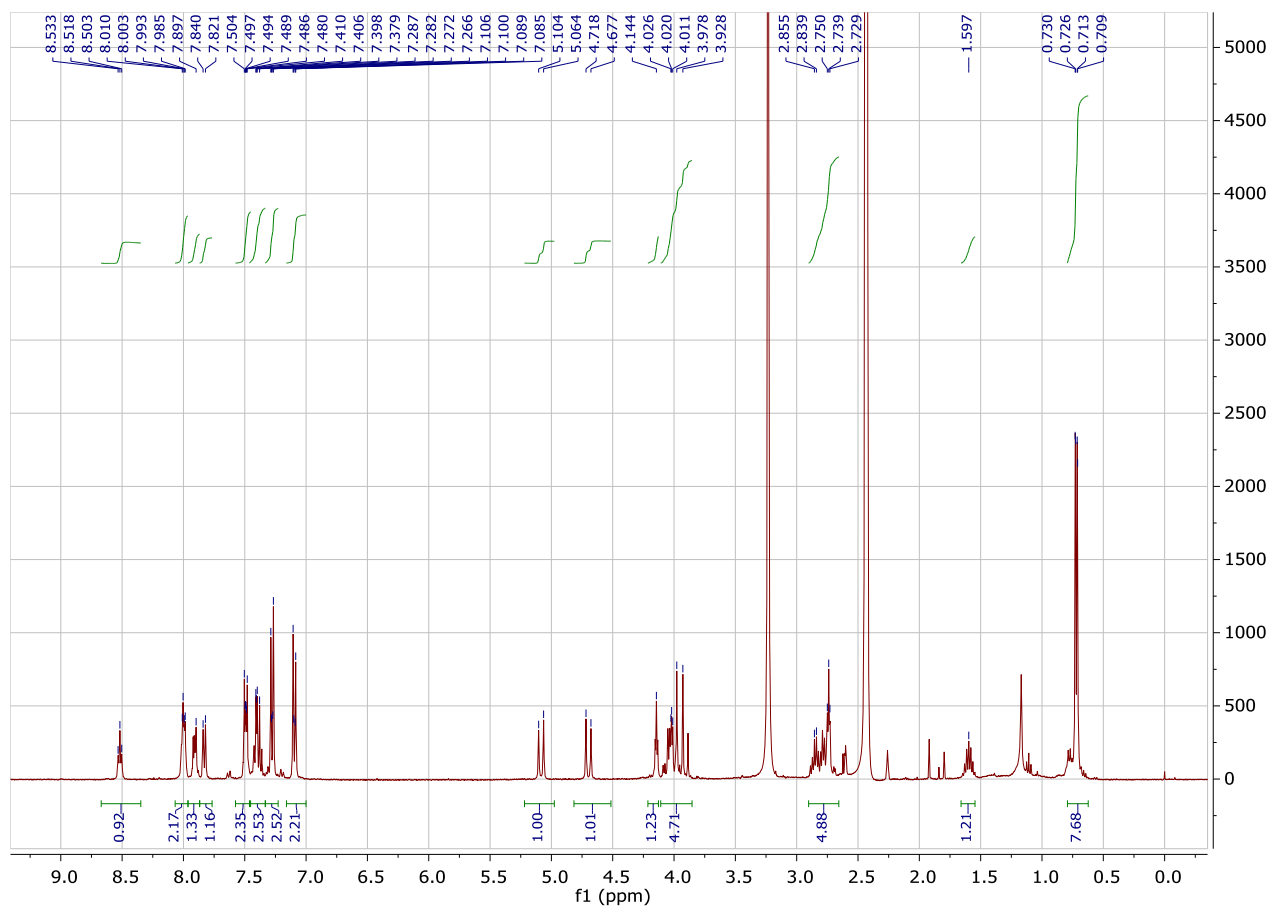

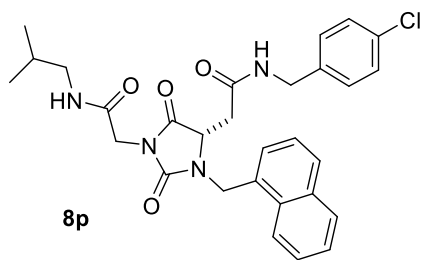

$^{13}\text{C}\{^1\text{H}\}$ -NMR (101 MHz,  $\text{CDCl}_3$ )

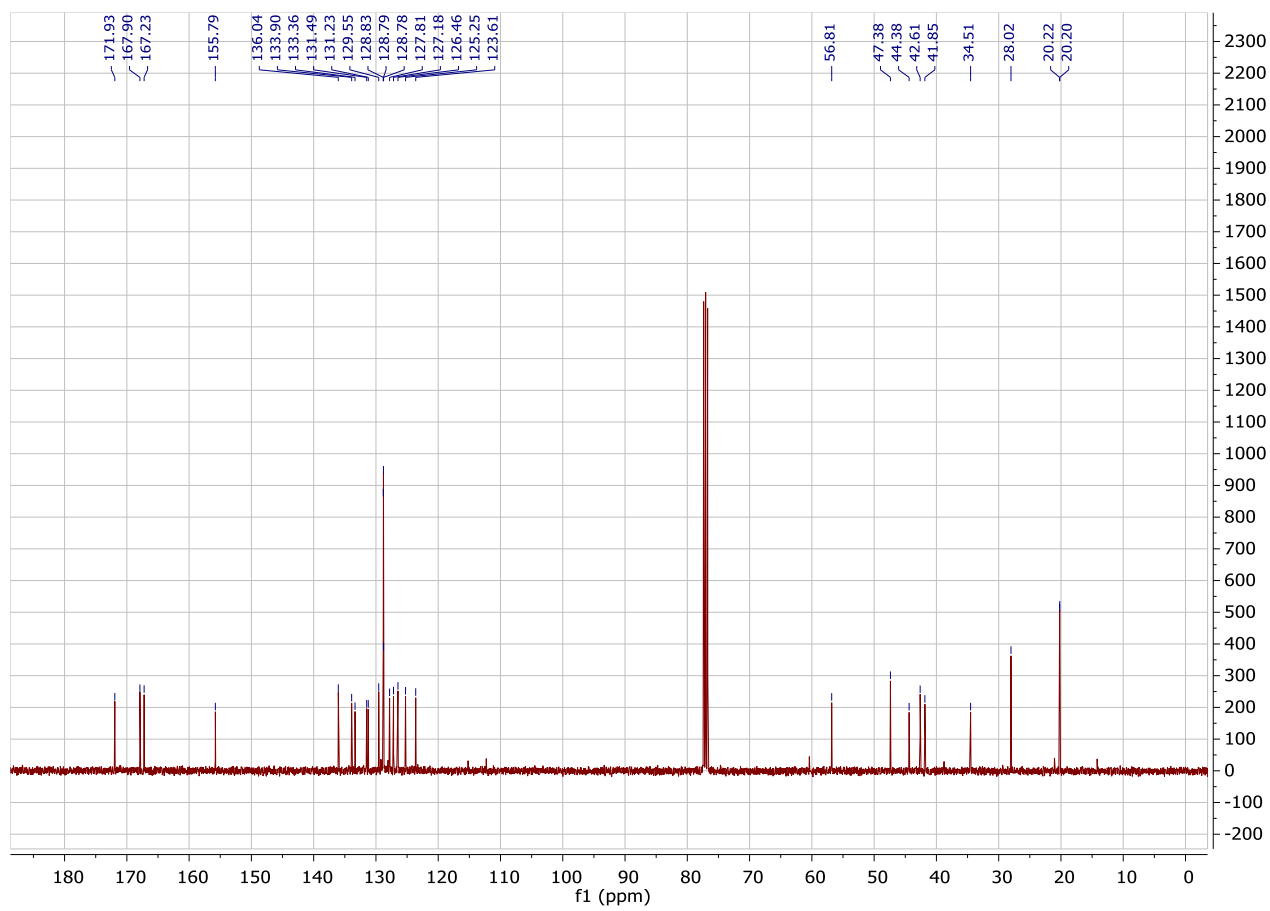

-L.G.S. - Laboratorio Grandi Strumenti - Display Report

Analysis Name av ac073.d  
Sample Name  
Comment 1 mg/ml dil 1:100 MeOH  
Richiedente: Caramiello

Acquisition Date 09/08/20 10:52:09  
Method Copy of \$PW\_TBLM.MS

Operator Walter Panzeri  
Instrument esquire3000plus

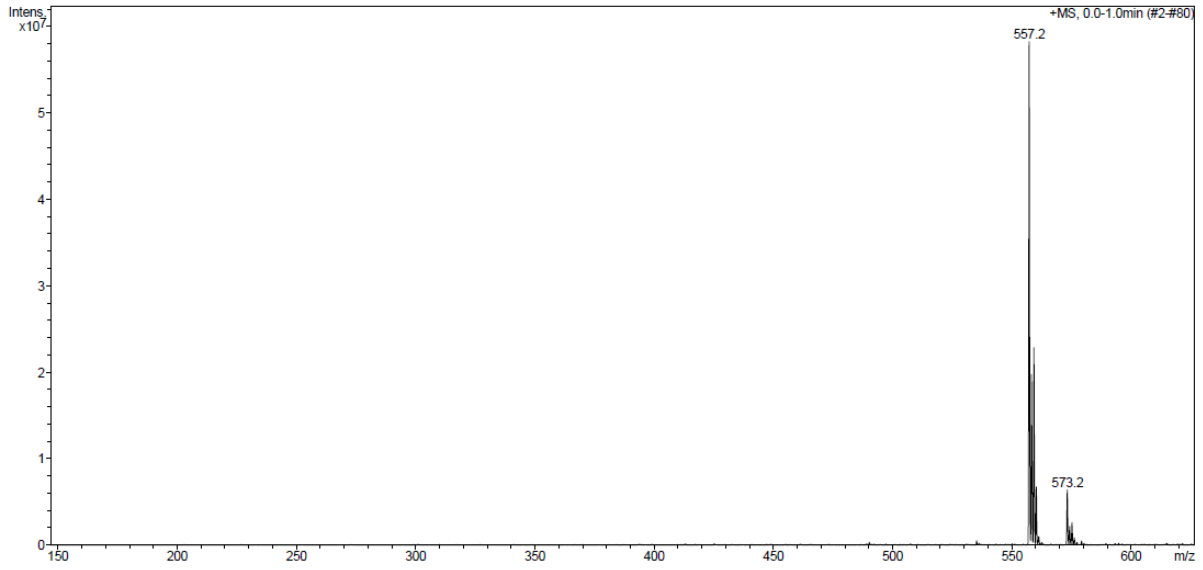

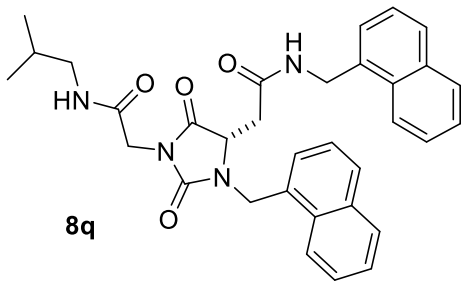

8q

$^1\text{H-NMR}$  (400 MHz,  $\text{CD}_3\text{OD}$ )

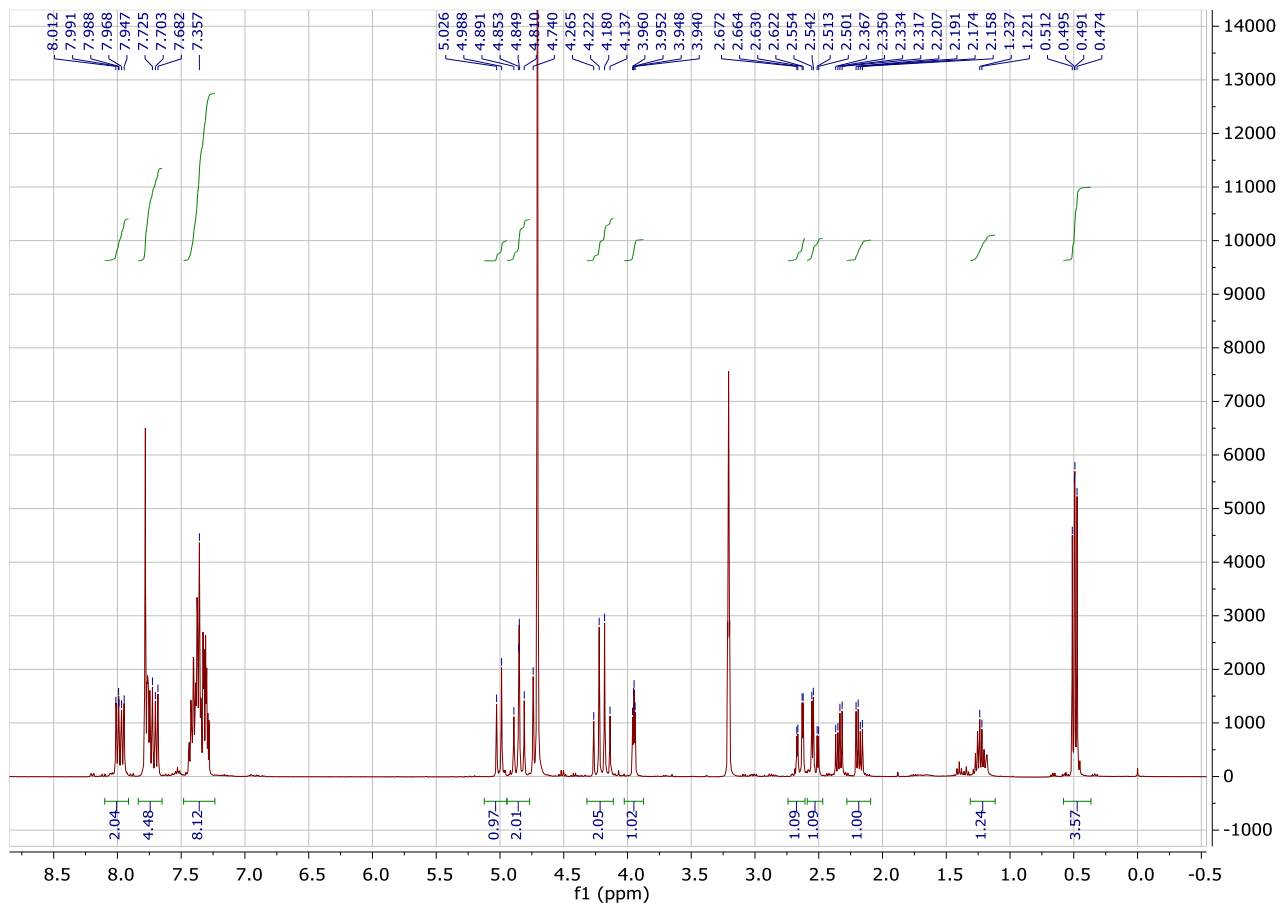

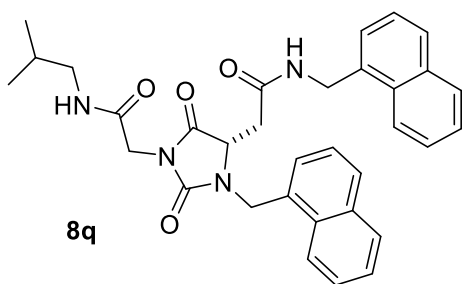

$^{13}\text{C}\{^1\text{H}\}$ -NMR (101 MHz,  $\text{CD}_3\text{OD}$ )

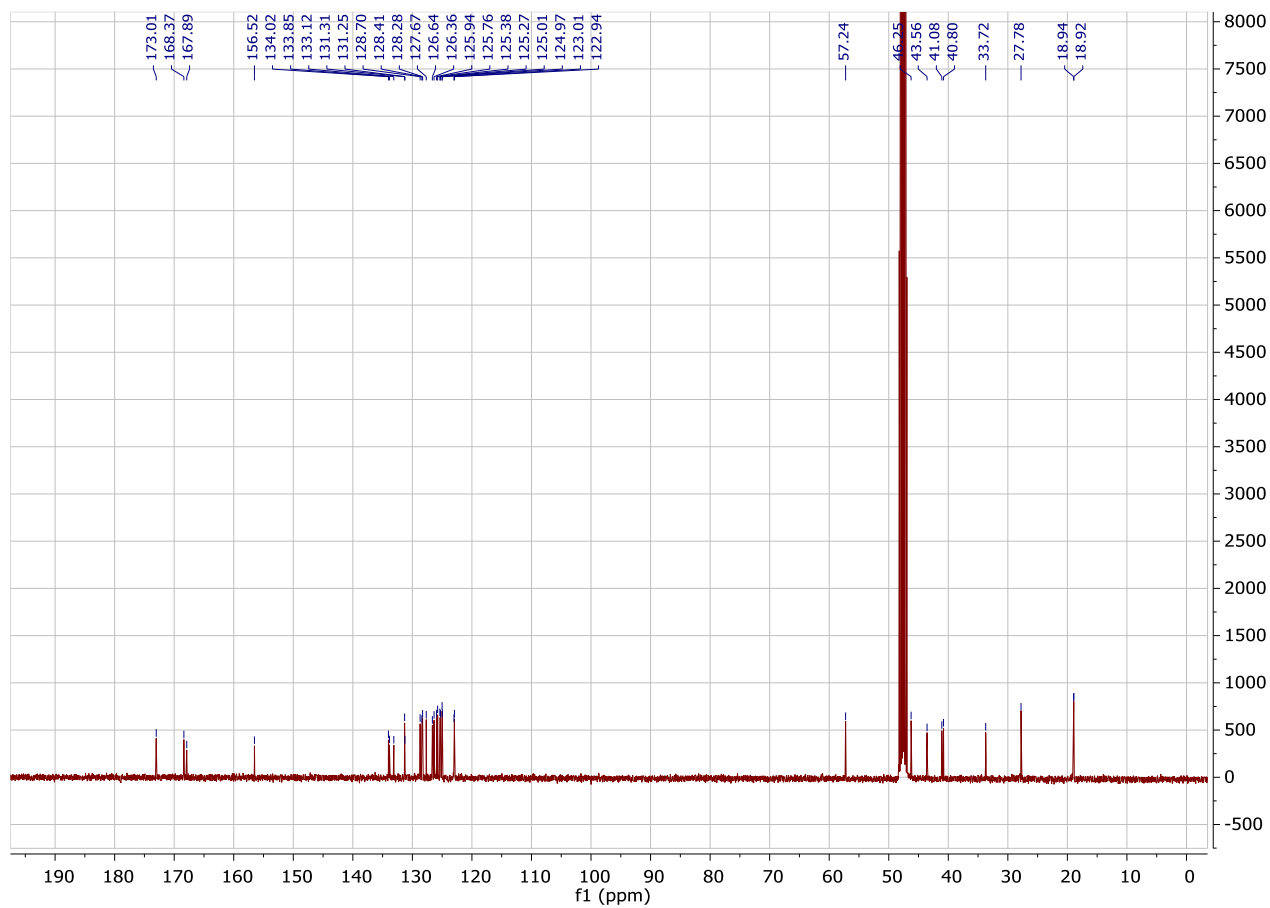



-L.G.S. - Laboratorio Grandi Strumenti - Display Report

Analysis Name av ac074.d  
Sample Name  
Comment 1 mg/ml dil 1:100 MeOH  
Richiedente: Caramiello

Acquisition Date 09/08/20 10:45:32  
Method Copy of \$PW\_TB.LM.MS

Operator  
Instrument

Walter Panzeri  
esquire3000plus

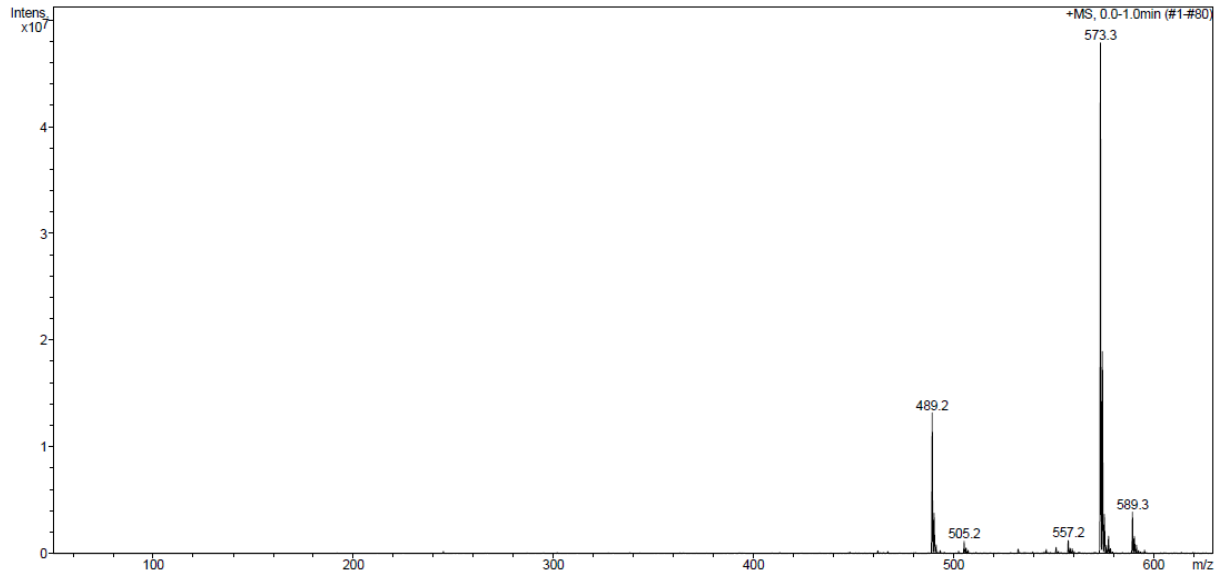

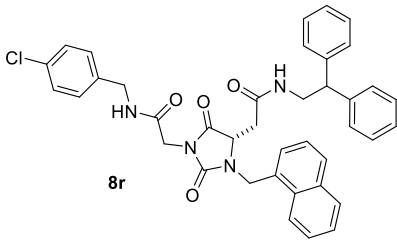

<sup>1</sup>H NMR and COSY in CDCl<sub>3</sub> (400 MHz)

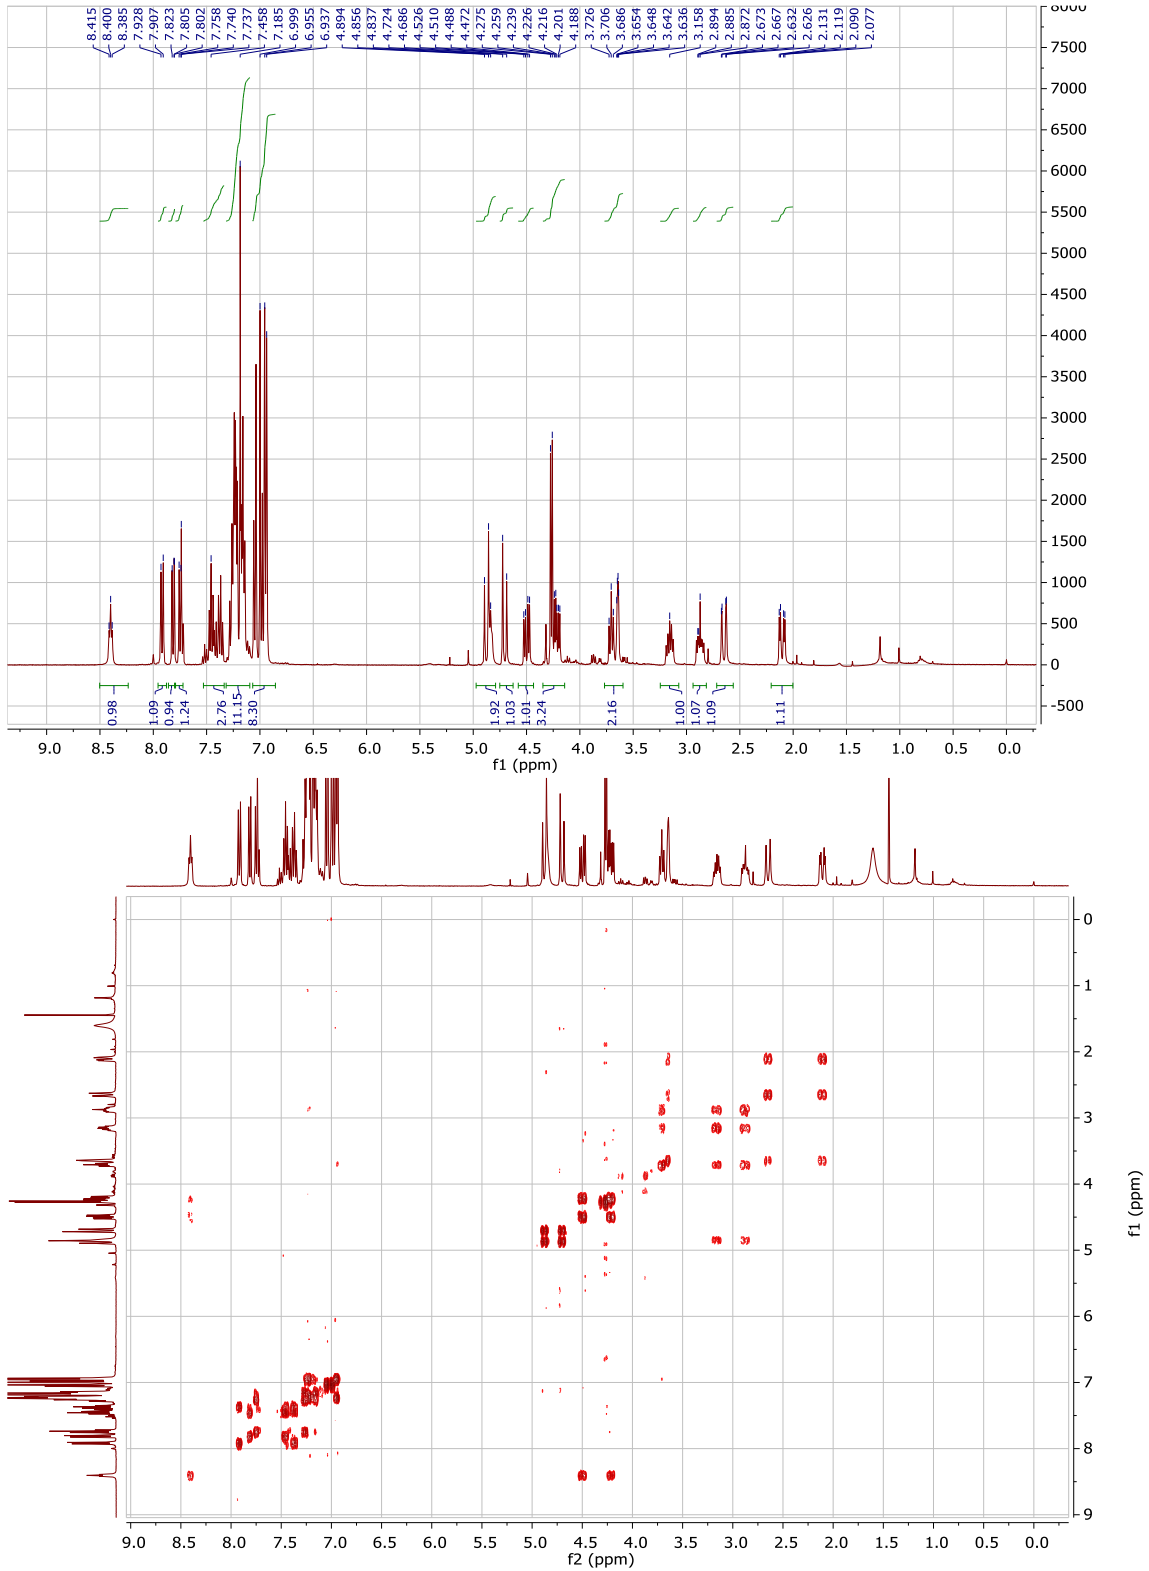

<sup>1</sup>H NMR and COSY in dms<sub>o</sub>-d<sub>6</sub> (400 MHz)

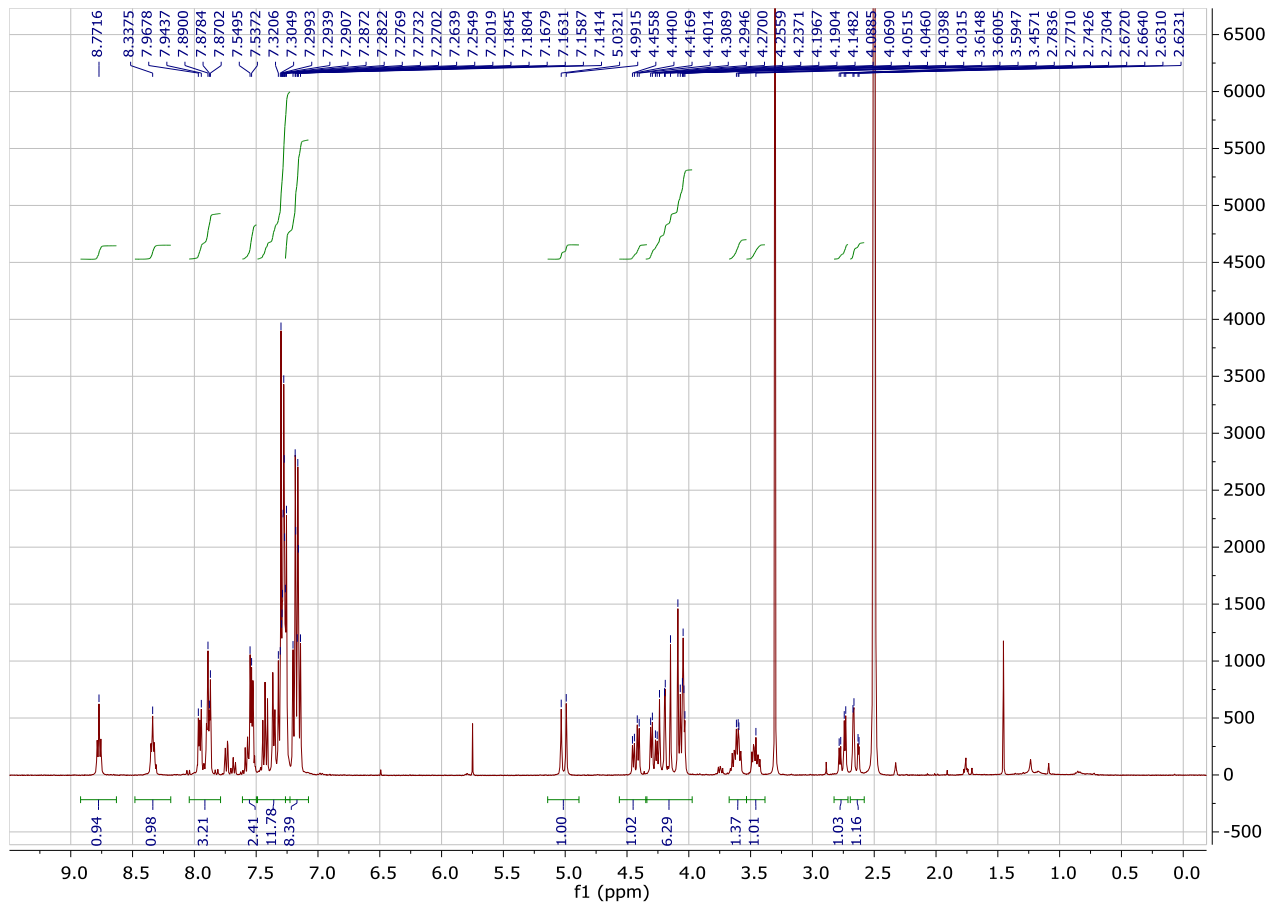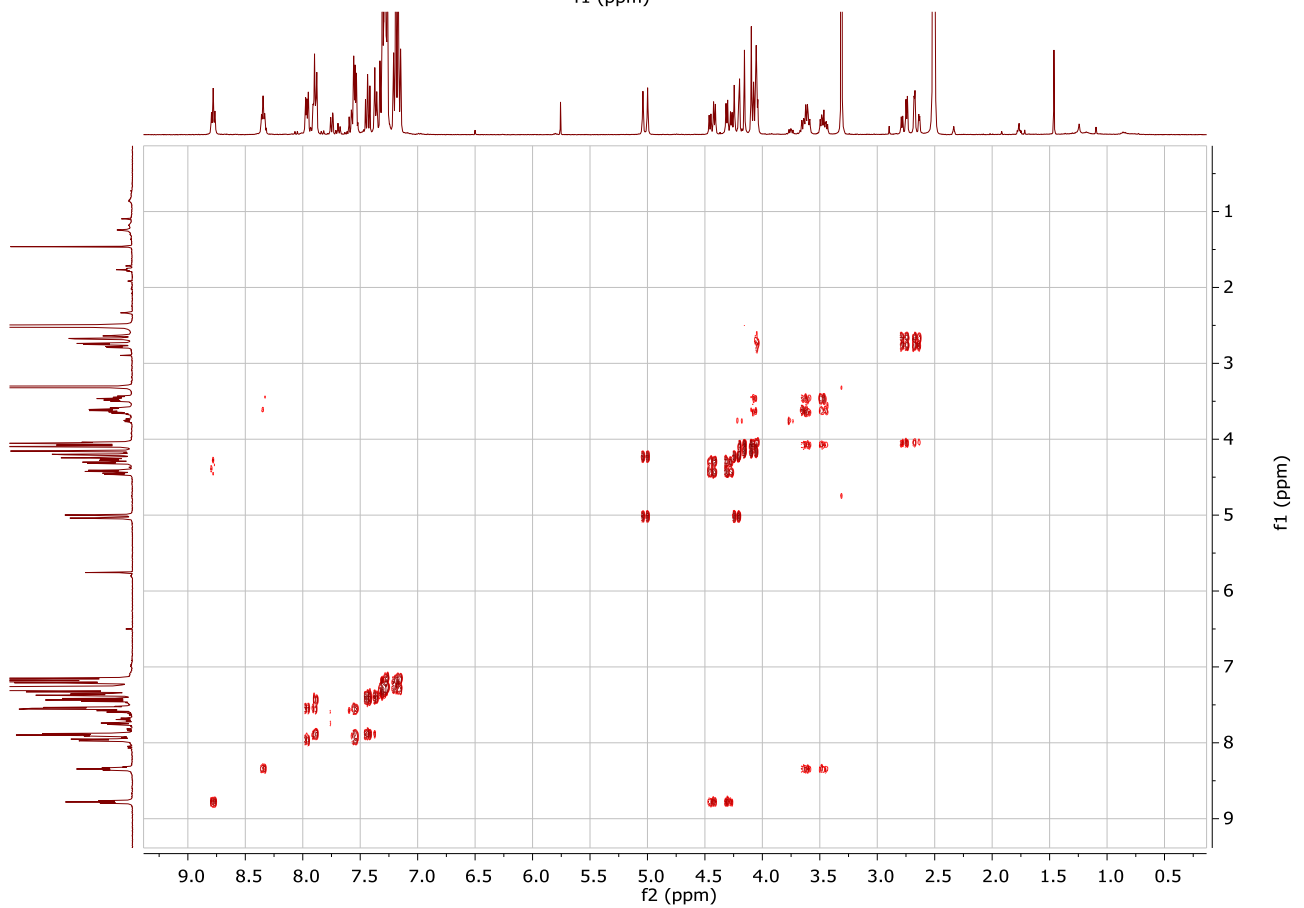

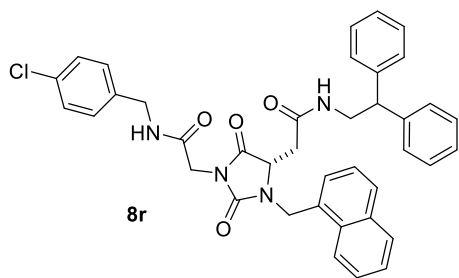

$^{13}\text{C}\{^1\text{H}\}$ -NMR (101 MHz,  $\text{CDCl}_3$ )

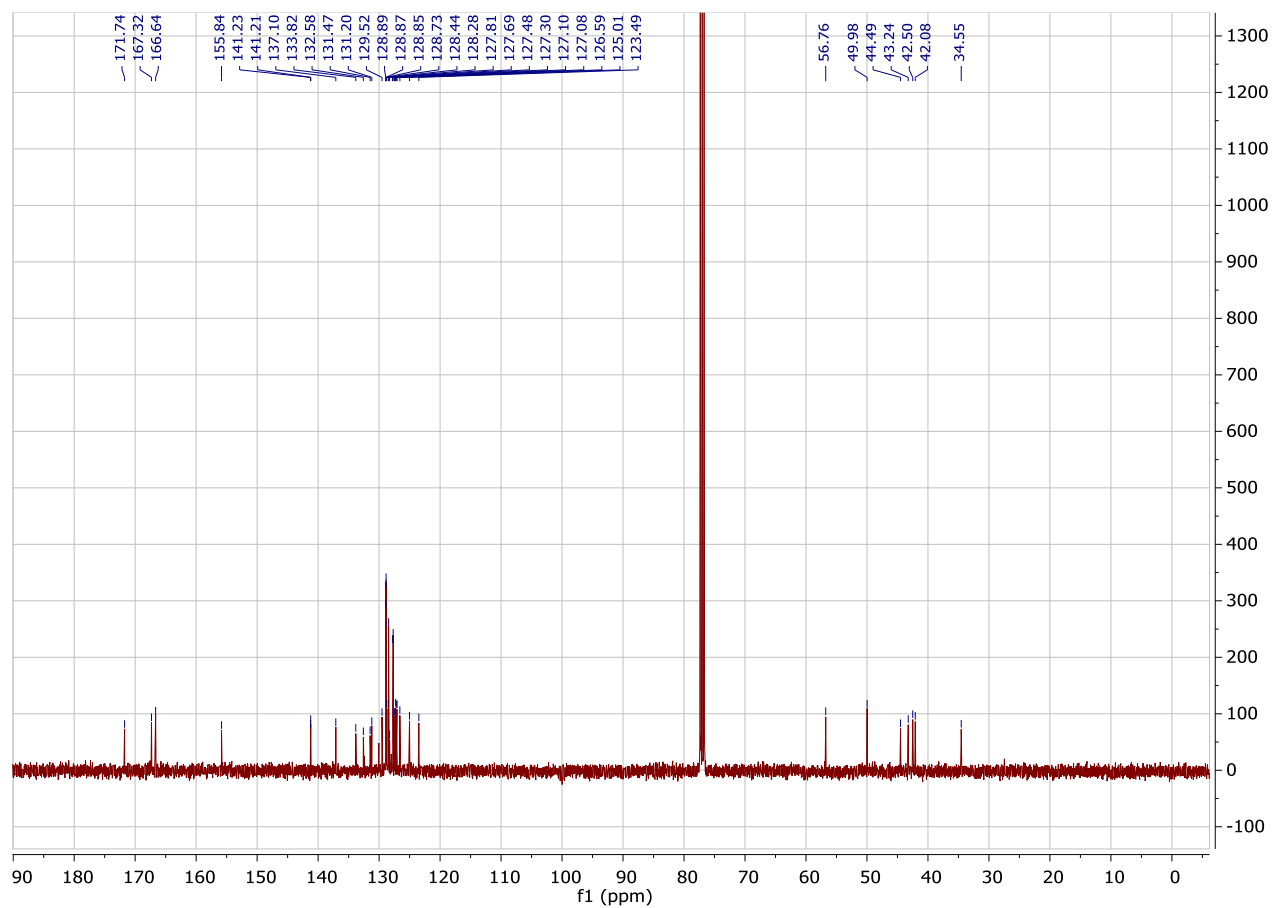

-L.G.S. - Laboratorio Grandi Strumenti - Display Report

Analysis Name av ac192.d  
Sample Name  
Comment 1 mg/ml dil 1:100 MeOH  
Richiedente: Caramiello

Acquisition Date 03/09/22 10:19:08  
Method Copy of \$opt0622.MS

Operator  
Instrument

Walter Panzeri  
esquire3000plus

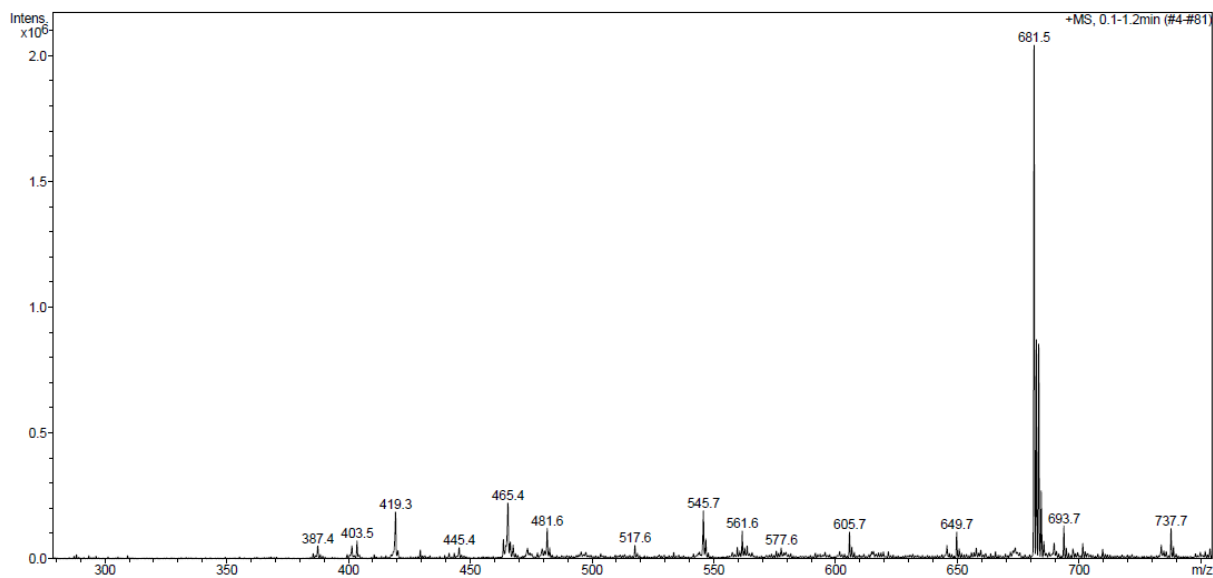

**Figure S1.** Results from Monte Carlo/MM conformational analysis. For each compounds the percentage of conformers meeting the geometrical requirements for  $\beta$ -turn,  $\alpha$ -helix and  $3_{10}$ -helix are reported.

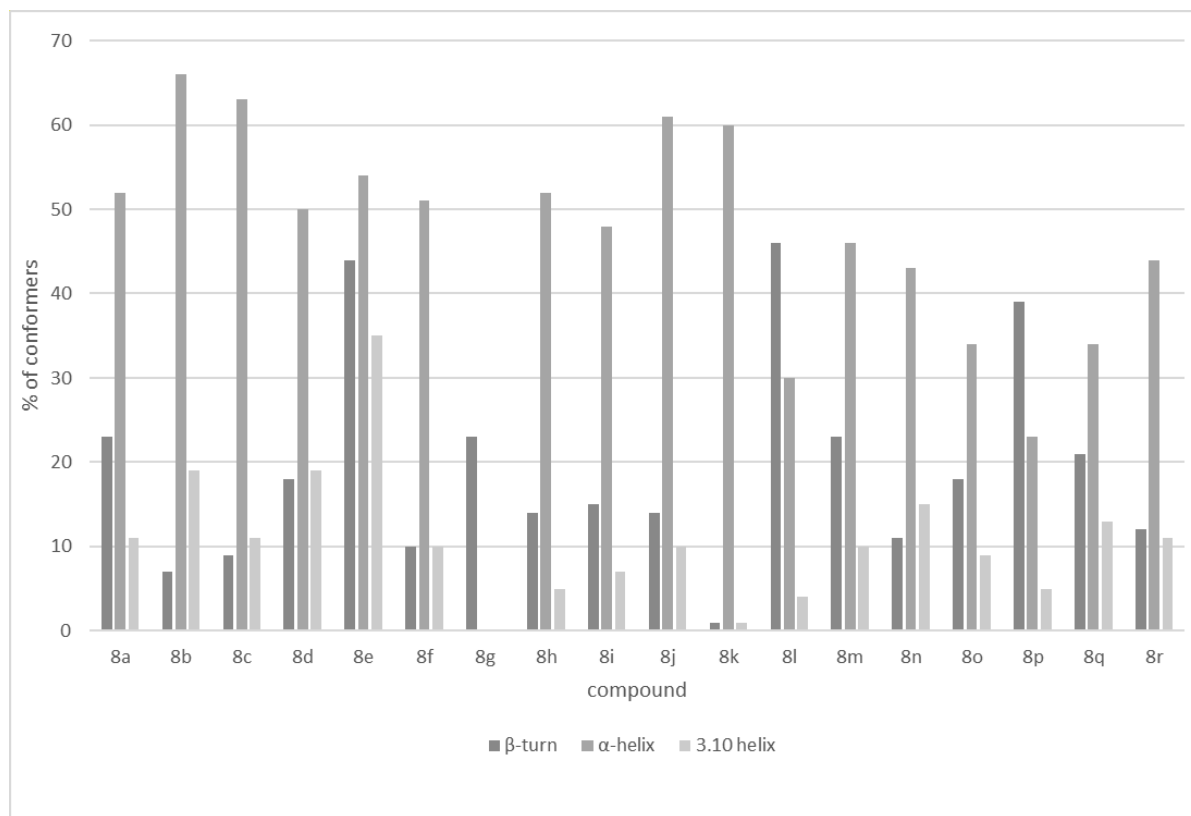

**Figure S2.** VT  $^1\text{H}$  NMR spectra of **8o** (400 MHz)

From the bottom to the top: a)  $^1\text{H}$  NMR in  $\text{CDCl}_3$  at 302 K, b)  $^1\text{H}$  NMR in  $\text{CDCl}_3$  at 306 K, c)  $^1\text{H}$  NMR in  $\text{CDCl}_3$  at 310 K, d)  $^1\text{H}$  NMR in  $\text{CDCl}_3$  at 314 K, e)  $^1\text{H}$  NMR in  $\text{CDCl}_3$  at 318 K.

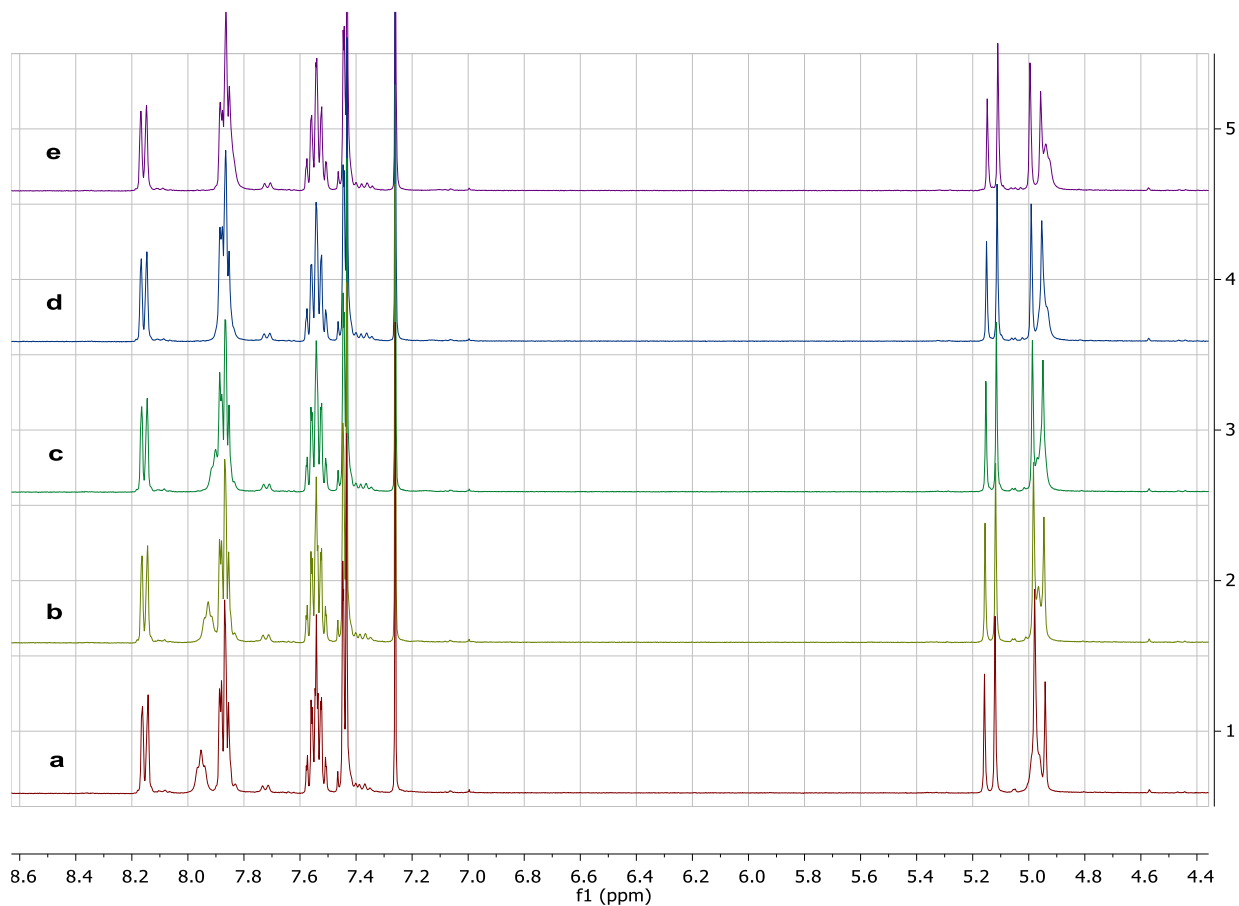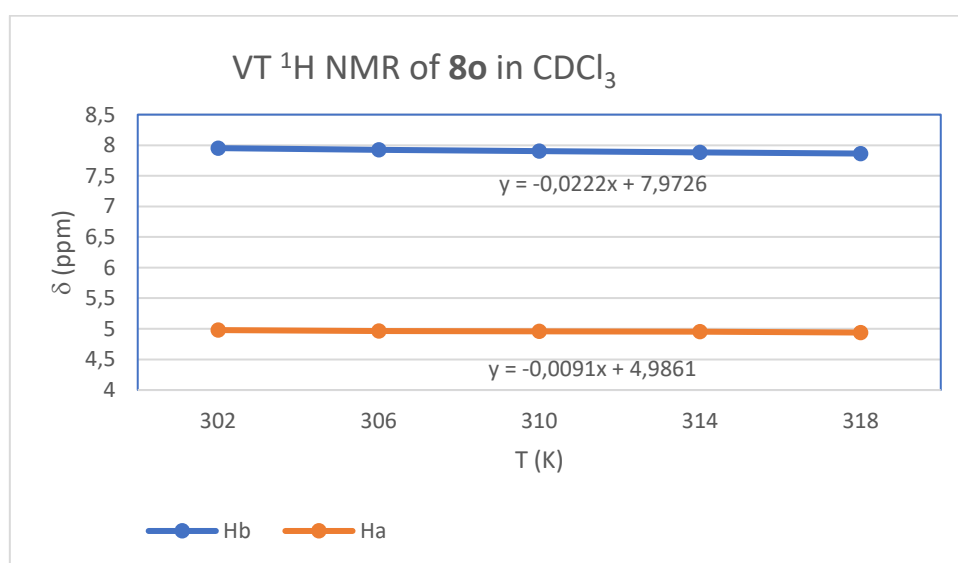

**Figure S3.** VT  $^1\text{H}$  NMR spectra of **8p** (400 MHz)

From the bottom to the top: a)  $^1\text{H}$  NMR in  $\text{CDCl}_3$  at 302 K, b)  $^1\text{H}$  NMR in  $\text{CDCl}_3$  at 306 K, c)  $^1\text{H}$  NMR in  $\text{CDCl}_3$  at 310 K, d)  $^1\text{H}$  NMR in  $\text{CDCl}_3$  at 314 K, e)  $^1\text{H}$  NMR in  $\text{CDCl}_3$  at 318 K.

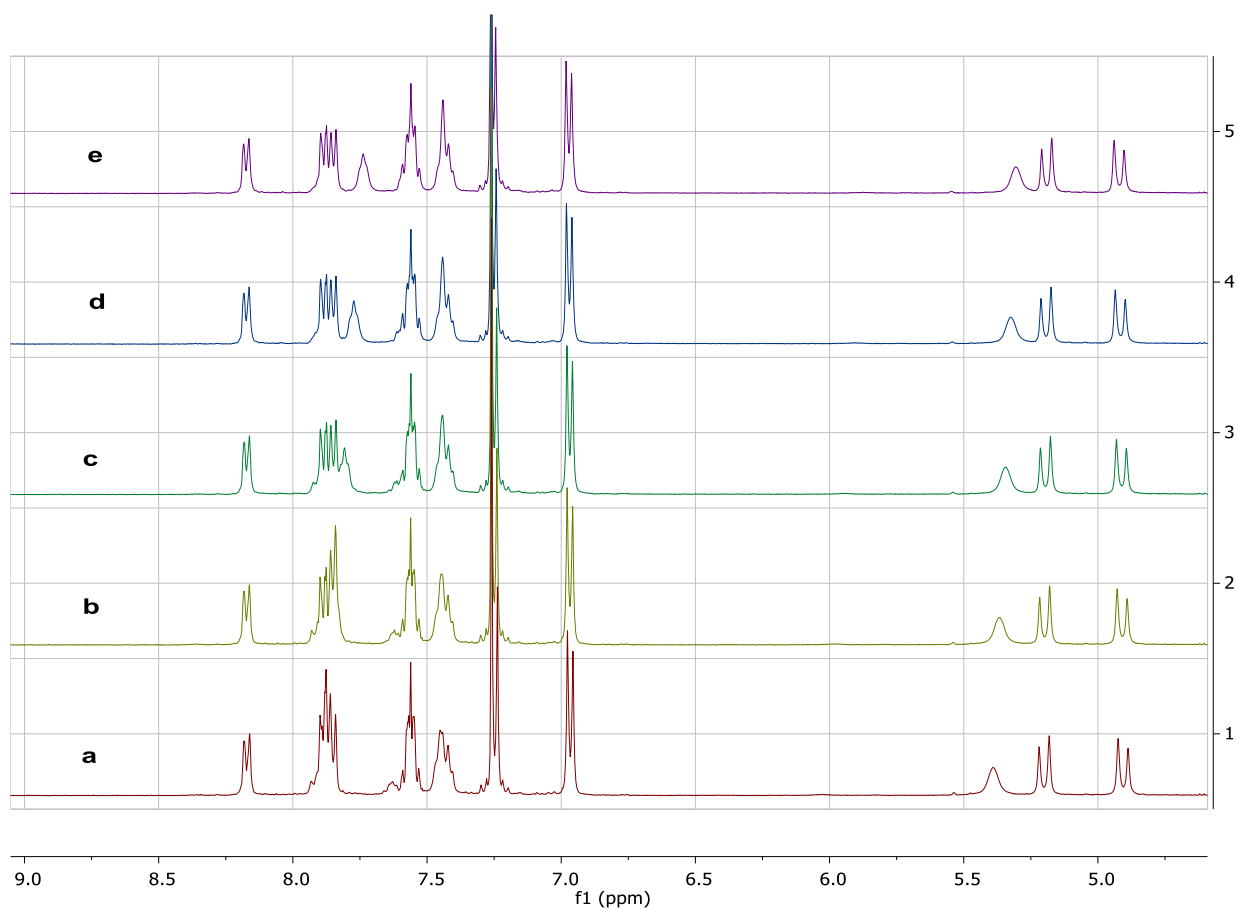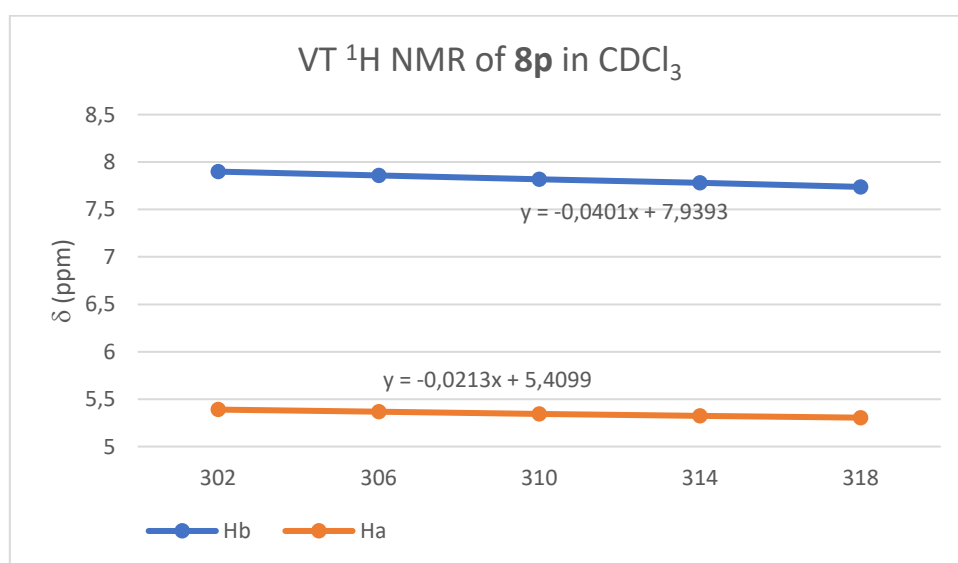



**Figure S4.** VT  $^1\text{H}$  NMR spectra of **8r** in  $\text{CDCl}_3$  (400 MHz)

From the bottom to the top: a)  $^1\text{H}$  NMR in  $\text{CDCl}_3$  at 302 K, b)  $^1\text{H}$  NMR in  $\text{CDCl}_3$  at 306 K, c)  $^1\text{H}$  NMR in  $\text{CDCl}_3$  at 310 K, d)  $^1\text{H}$  NMR in  $\text{CDCl}_3$  at 314 K, e)  $^1\text{H}$  NMR in  $\text{CDCl}_3$  at 318 K.

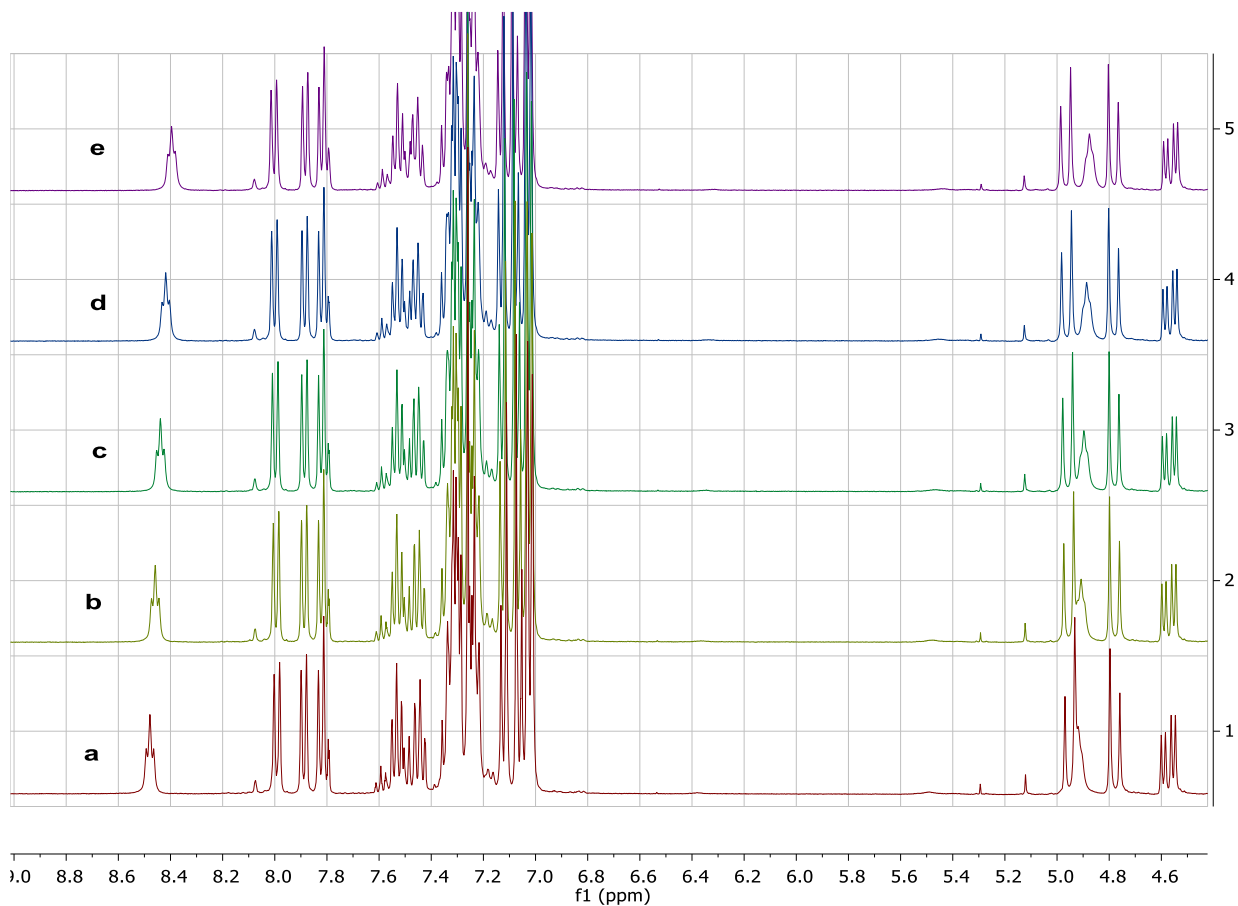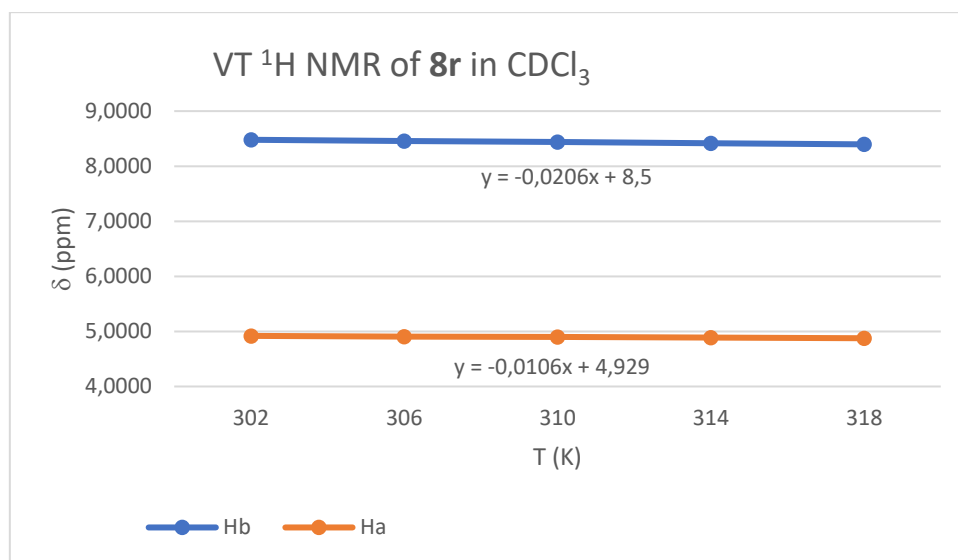

**Figure S5.** VT  $^1\text{H}$  NMR spectra of **8p** in  $\text{dms}\text{-d}_6$  (400 MHz)

From the bottom to the top: a)  $^1\text{H}$  NMR in  $\text{dms}\text{-d}_6$  at 302 K, b)  $^1\text{H}$  NMR in  $\text{dms}\text{-d}_6$  at 306 K, c)  $^1\text{H}$  NMR in  $\text{dms}\text{-d}_6$  at 310 K, d)  $^1\text{H}$  NMR in  $\text{dms}\text{-d}_6$  at 314 K, e)  $^1\text{H}$  NMR in  $\text{dms}\text{-d}_6$  at 318 K.

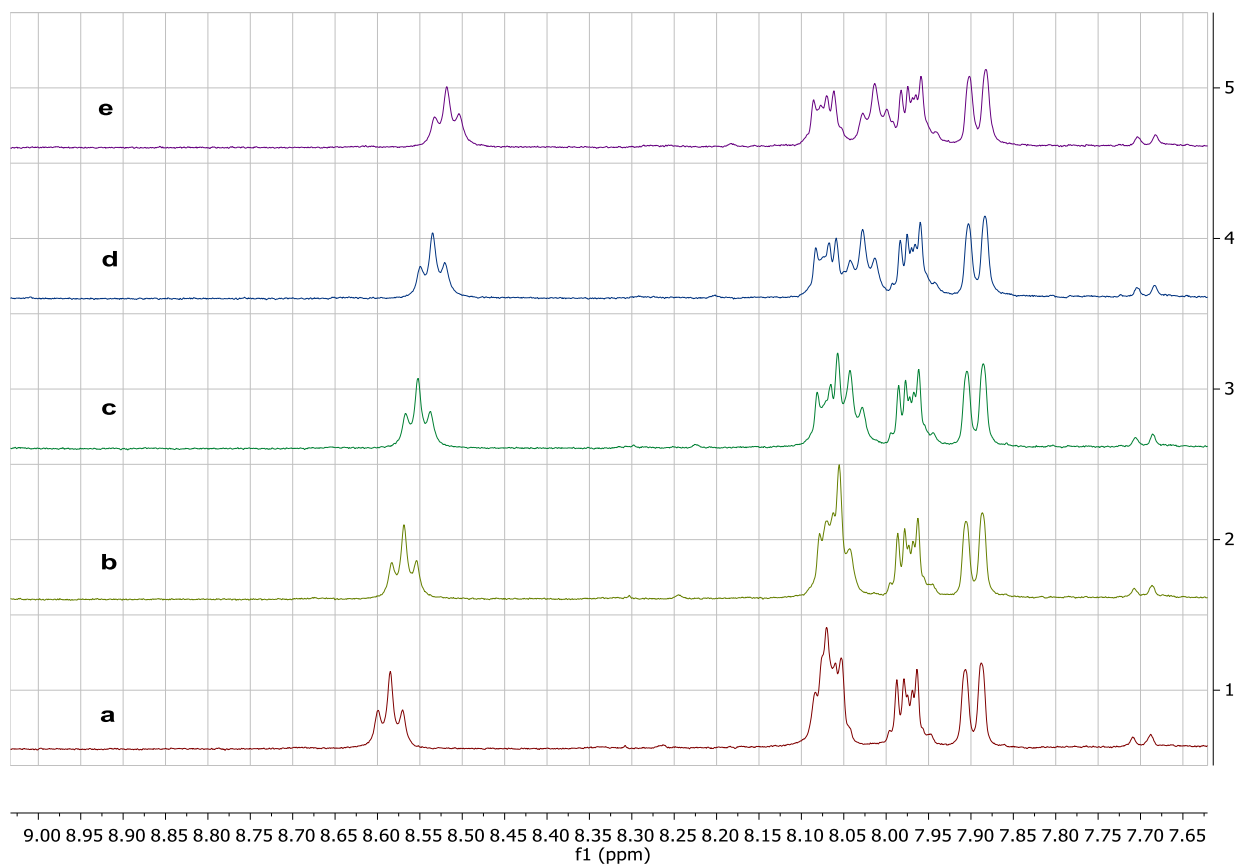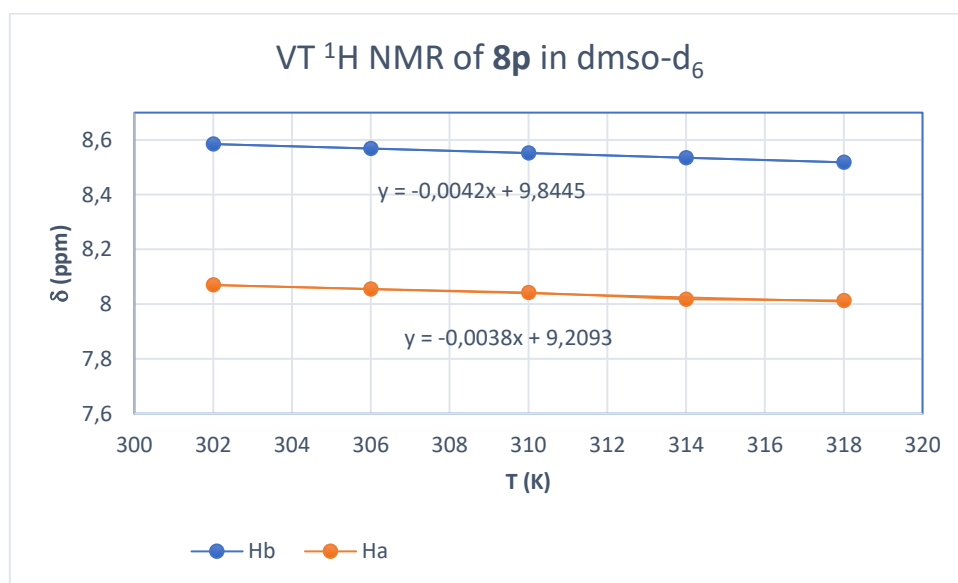

**Figure S6.** VT  $^1\text{H}$  NMR spectra of **8r** in  $\text{dms}\text{-d}_6$  (400 MHz)

From the bottom to the top: a)  $^1\text{H}$  NMR in  $\text{dms}\text{-d}_6$  at 302 K, b)  $^1\text{H}$  NMR in  $\text{dms}\text{-d}_6$  at 304 K, c)  $^1\text{H}$  NMR in  $\text{dms}\text{-d}_6$  at 306 K, d)  $^1\text{H}$  NMR in  $\text{dms}\text{-d}_6$  at 310 K, e)  $^1\text{H}$  NMR in  $\text{dms}\text{-d}_6$  at 314 K, f)  $^1\text{H}$  NMR in  $\text{dms}\text{-d}_6$  at 318 K.

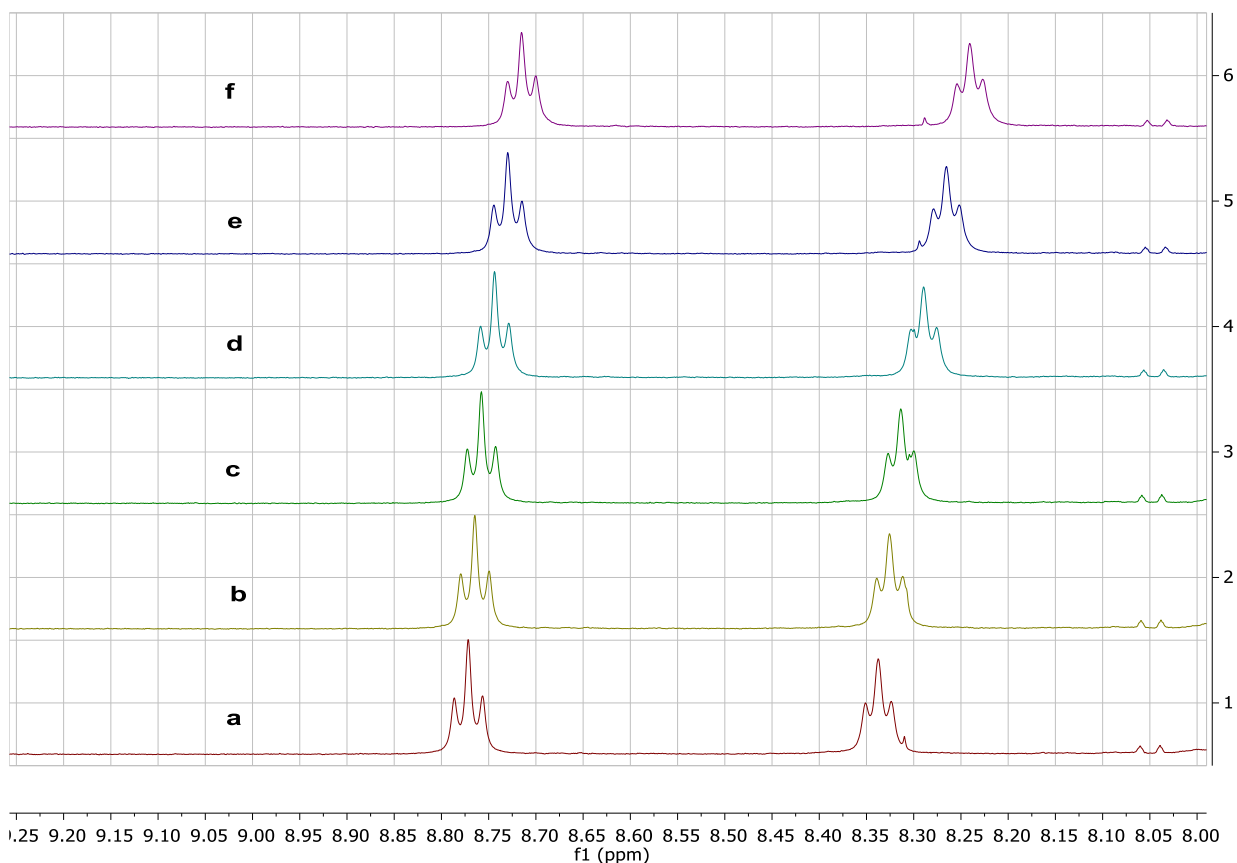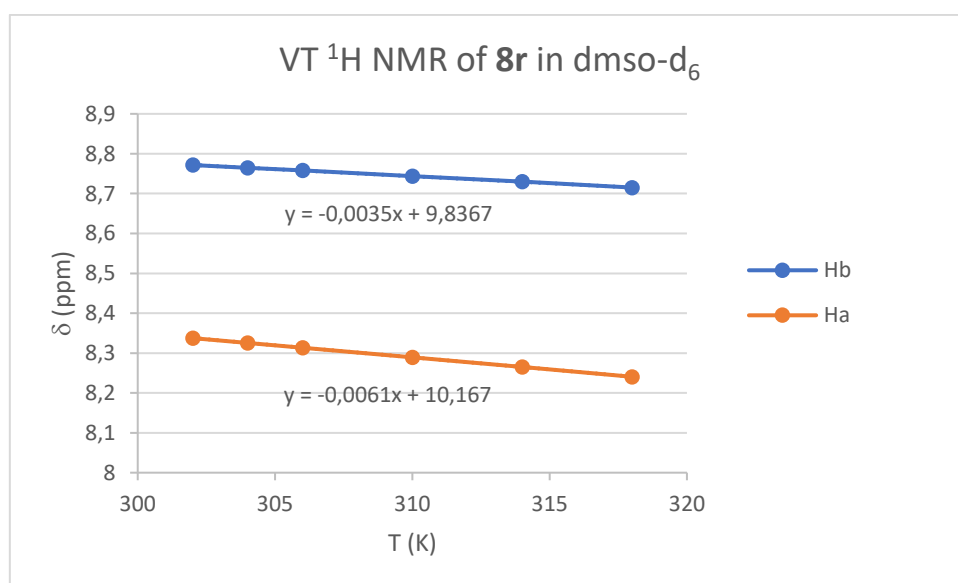

**Figure S7.** DMSO titration  $^1\text{H}$  NMR spectra of **8p** (500 MHz)

From the bottom to the top: a)  $^1\text{H}$  NMR in  $\text{CDCl}_3$ , b)  $^1\text{H}$  NMR in  $\text{CDCl}_3$  + 5  $\mu\text{L}$  of DMSO, c)  $^1\text{H}$  NMR in  $\text{CDCl}_3$  + 10  $\mu\text{L}$  of DMSO, d)  $^1\text{H}$  NMR in  $\text{CDCl}_3$  + 15  $\mu\text{L}$  of DMSO, e)  $^1\text{H}$  NMR in  $\text{CDCl}_3$  + 20  $\mu\text{L}$  of DMSO, f)  $^1\text{H}$  NMR in  $\text{CDCl}_3$  + 25  $\mu\text{L}$  of DMSO; g)  $^1\text{H}$  NMR in  $\text{CDCl}_3$  + 30  $\mu\text{L}$  of DMSO; h)  $^1\text{H}$  NMR in  $\text{CDCl}_3$  + 35  $\mu\text{L}$  of DMSO, i)  $^1\text{H}$  NMR in  $\text{CDCl}_3$  + 40  $\mu\text{L}$  of DMSO.

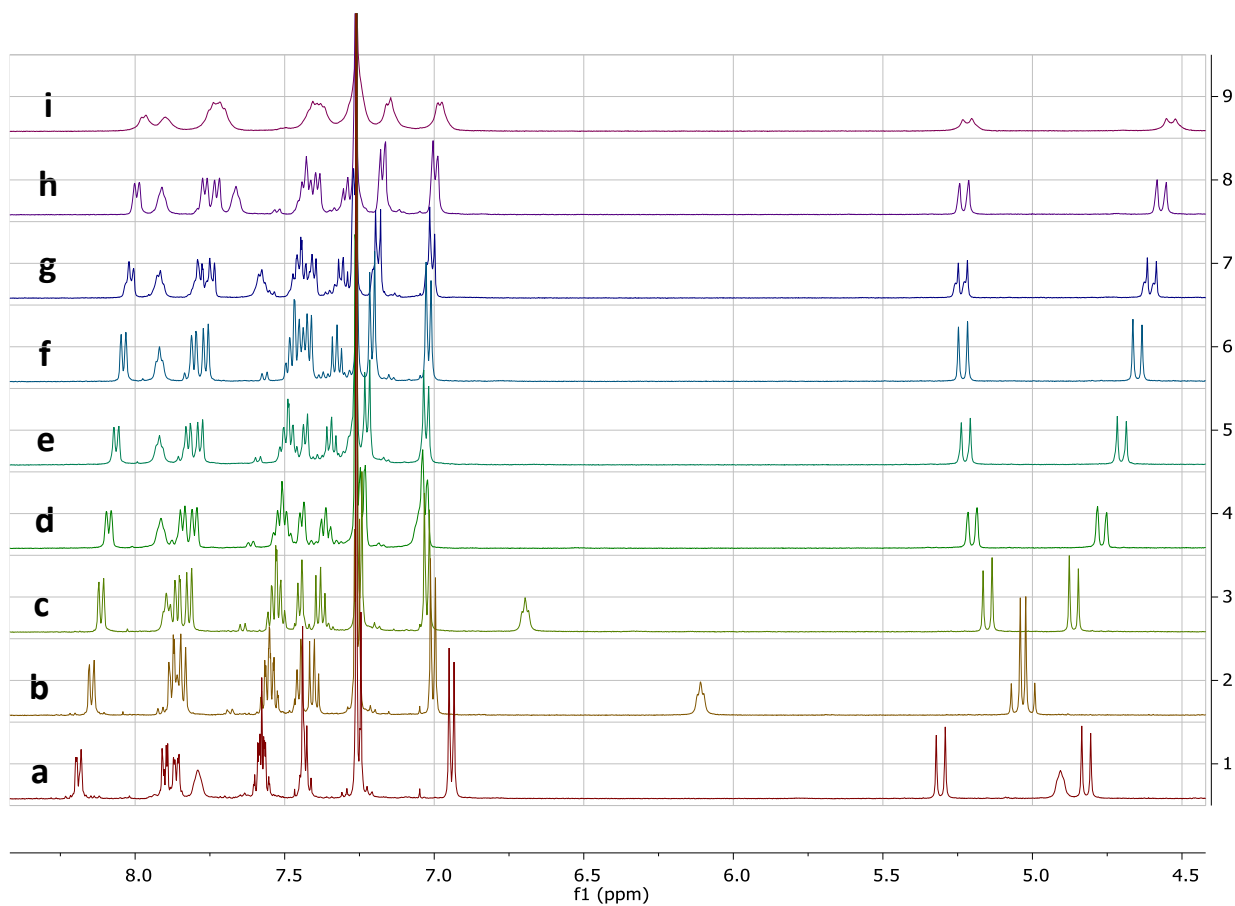

**Figure S8.** DMSO titration  $^1\text{H}$  NMR spectra of **8r** (500 MHz)

From the bottom to the top: a)  $^1\text{H}$  NMR in  $\text{CDCl}_3$ , b)  $^1\text{H}$  NMR in  $\text{CDCl}_3$  + 5  $\mu\text{L}$  of DMSO, c)  $^1\text{H}$  NMR in  $\text{CDCl}_3$  + 10  $\mu\text{L}$  of DMSO, d)  $^1\text{H}$  NMR in  $\text{CDCl}_3$  + 15  $\mu\text{L}$  of DMSO, e)  $^1\text{H}$  NMR in  $\text{CDCl}_3$  + 20  $\mu\text{L}$  of DMSO, f)  $^1\text{H}$  NMR in  $\text{CDCl}_3$  + 25  $\mu\text{L}$  of DMSO; g)  $^1\text{H}$  NMR in  $\text{CDCl}_3$  + 30  $\mu\text{L}$  of DMSO; h)  $^1\text{H}$  NMR in  $\text{CDCl}_3$  + 35  $\mu\text{L}$  of DMSO, i)  $^1\text{H}$  NMR in  $\text{CDCl}_3$  + 40  $\mu\text{L}$  of DMSO, j)  $^1\text{H}$  NMR in  $\text{CDCl}_3$  + 45  $\mu\text{L}$  of DMSO, k)  $^1\text{H}$  NMR in  $\text{CDCl}_3$  + 50  $\mu\text{L}$  of DMSO

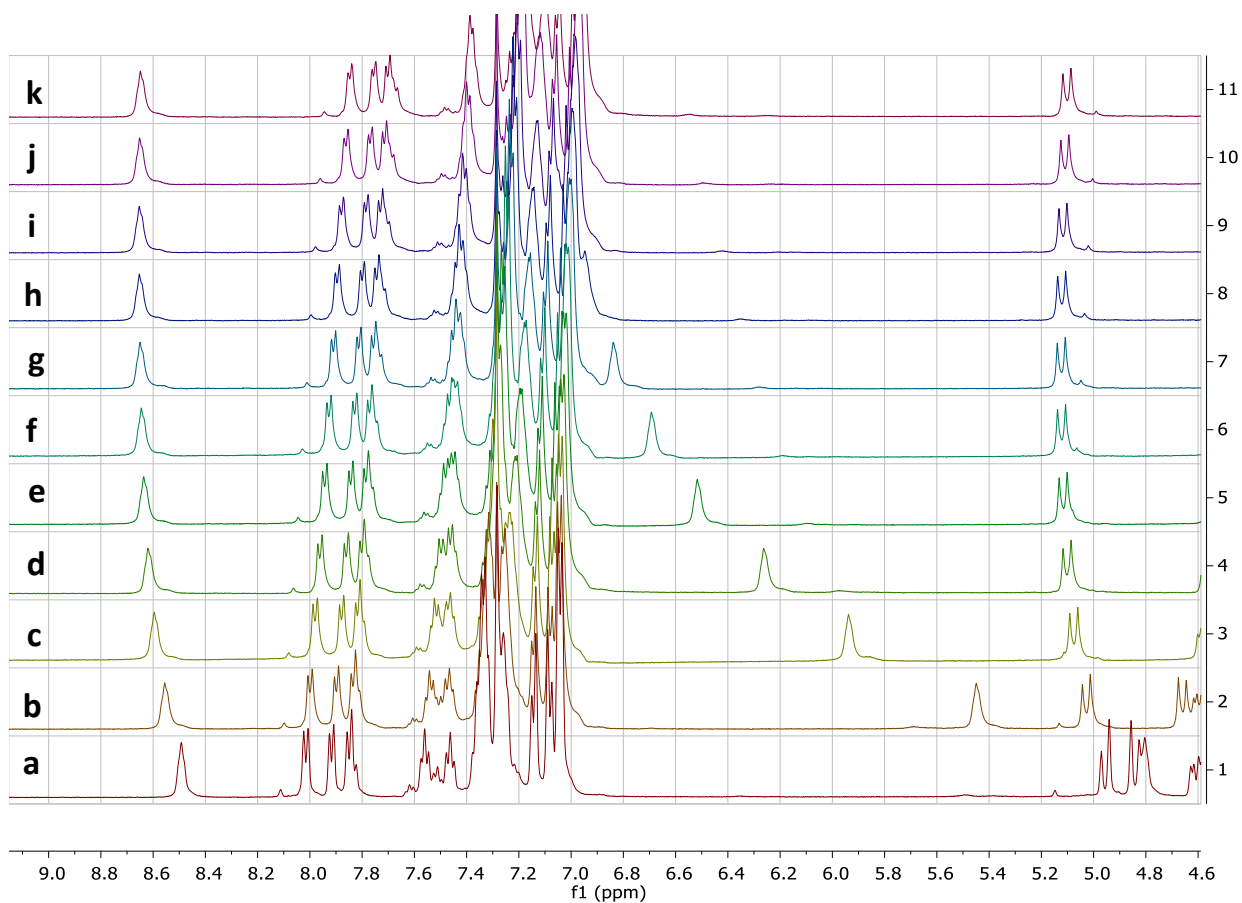

**Table S1.** Selected H-bond distances and angles.

| <b>Bond</b>   | <b>D...A (Å)</b> | <b>D-H...A (Å)</b> | <b>D-H...A (°)</b> | <b>Equivalent positions</b> |
|---------------|------------------|--------------------|--------------------|-----------------------------|
| N3-H3N...O4   | 2.727(9)         | 1.965(6)           | 147.2(5)           | x,y,z                       |
| N4-H4N...O3   | 2.843(9)         | 2.001(6)           | 166.1(5)           | x,y-1,z                     |
| C38-H38...O1  | 3.651(12)        | 2.738(6)           | 167.5(6)           | x,y,z                       |
| C31-H31...O3  | 3.751(11)        | 2.947(6)           | 145.5(6)           | x,y-1,z                     |
| C32-H32...O1  | 3.784(13)        | 2.894(6)           | 160.5(7)           | x,y-1,z                     |
| C25-H25...Cl1 | 3.775(20)        | 2.895(5)           | 158(1)             | 1-x,y,1-z                   |
